# Supplementary material for: Construction of a six-membered fused N-heterocyclic ring via a new 3-component reaction: synthesis of (pyrazolo)pyrimidines/pyridines
Source: Royal Society of Chemistry journal article supplement (doi:10.1039/c1cc16418j), 2011-10-21
Supplement: c1cc16418j.pdf [file c1cc16418j.pdf]

# Copies of <sup>1</sup>H NMR

NMR-400 in CDCl<sub>3</sub>  
AK.NO:ME0511/1922  
Date:18th May . 2011

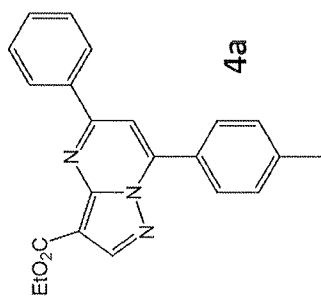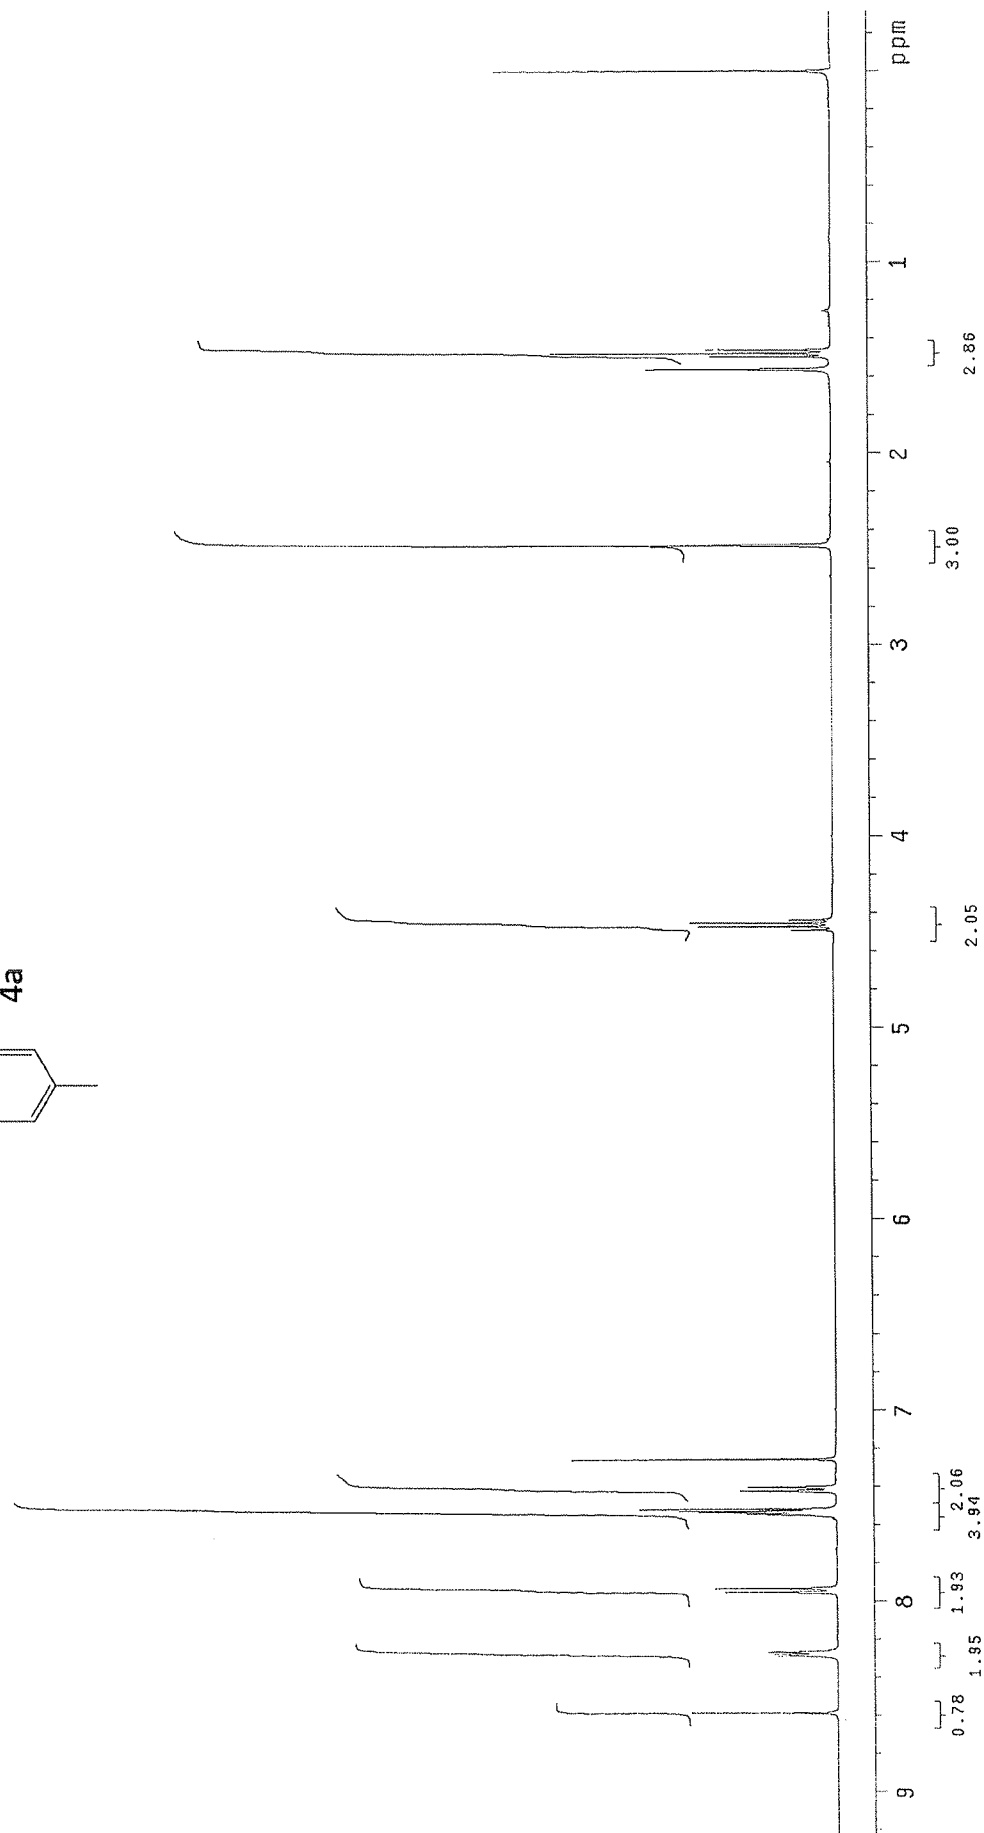

# Copies of <sup>1</sup>H NMR

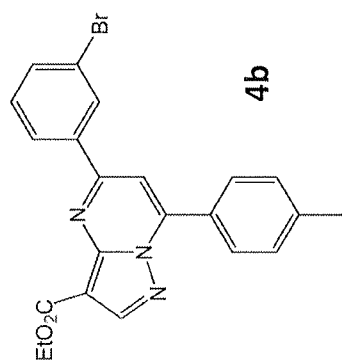

4b

NMR-400 in CDCl<sub>3</sub>  
AK.NO:ME0511/1923  
Date:18th May. 2011

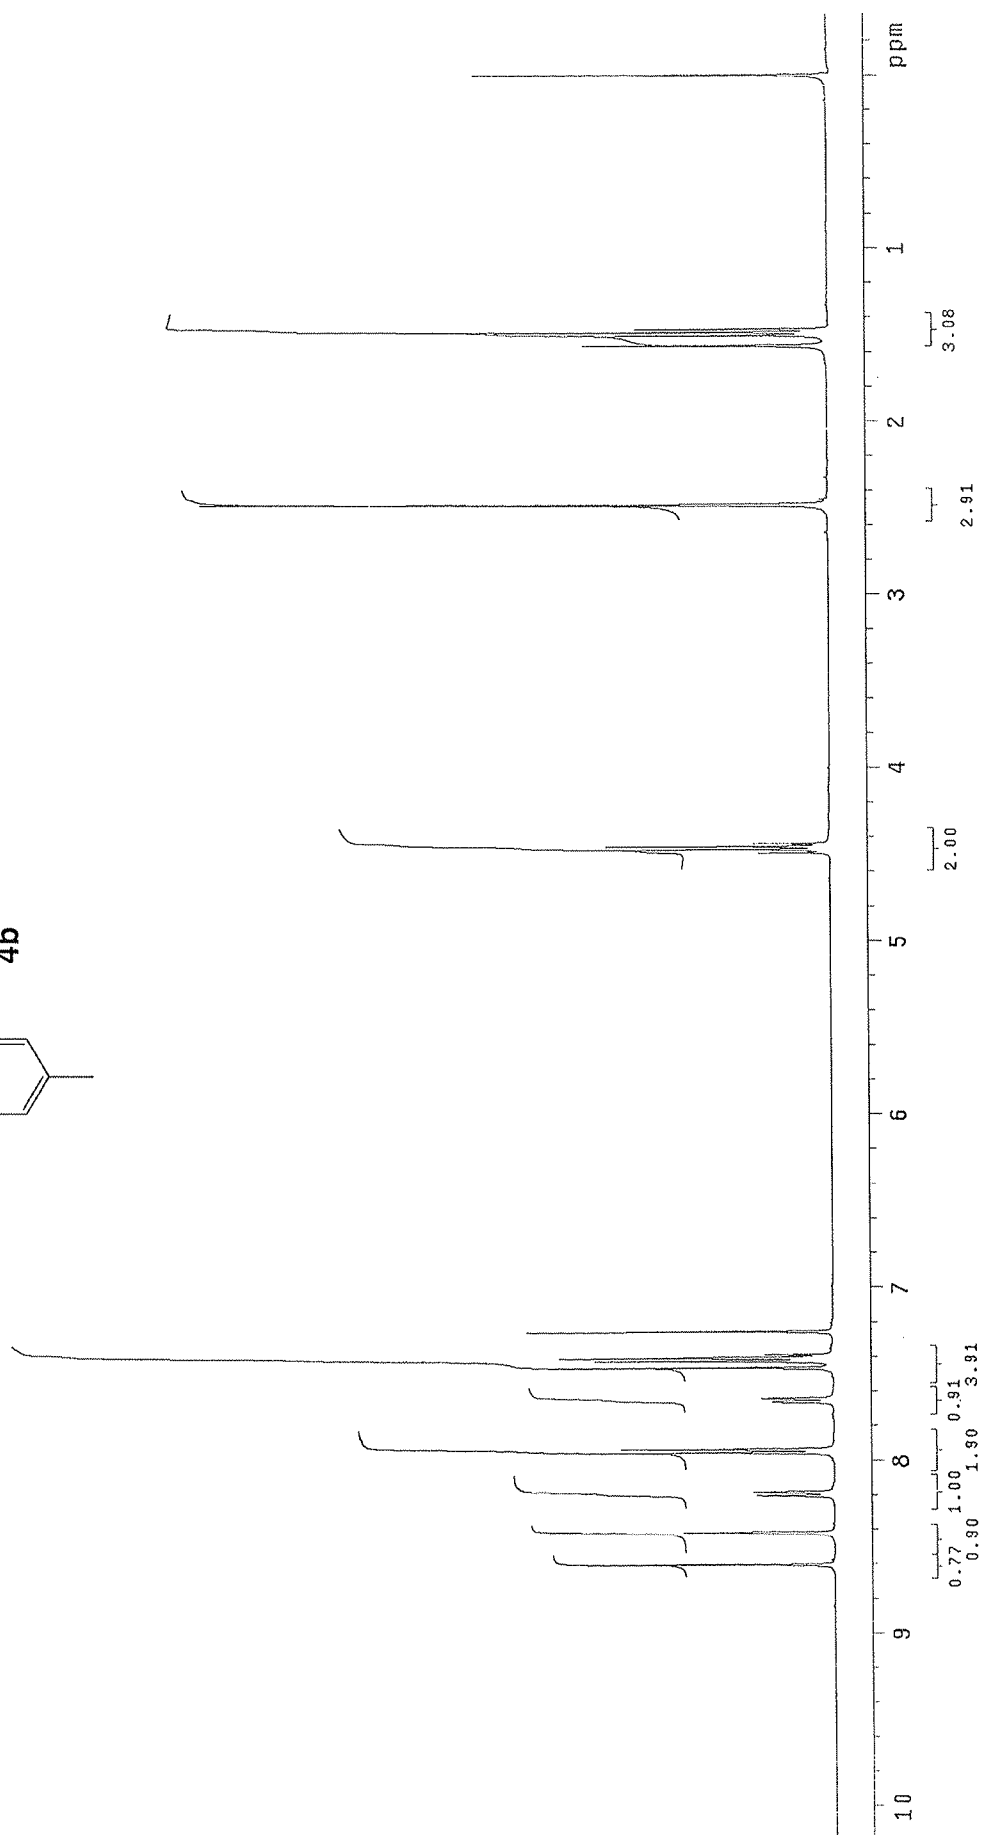

# Copies of <sup>1</sup>H NMR

NMR-400 in CDCl<sub>3</sub>  
AR.No:ME0411/2165  
Date: 21 st April, 2011

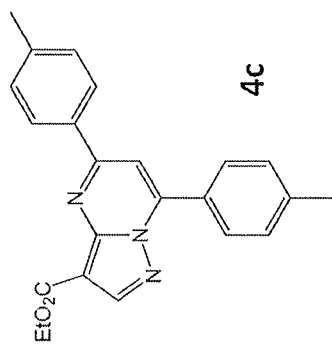

4c

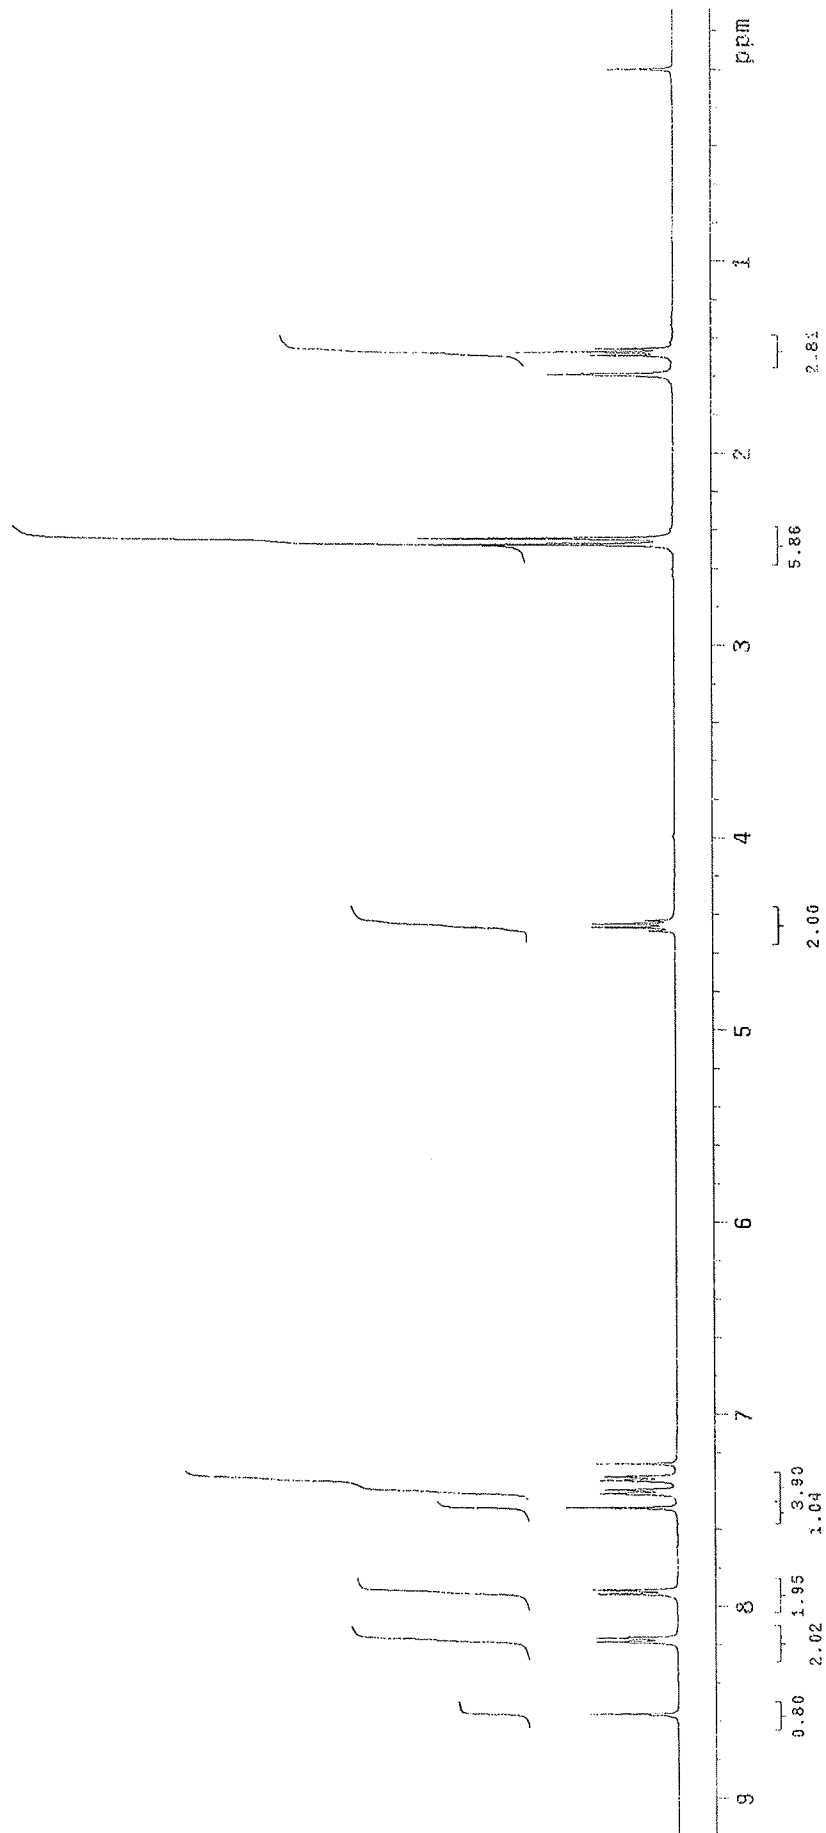

# Copies of <sup>1</sup>H NMR

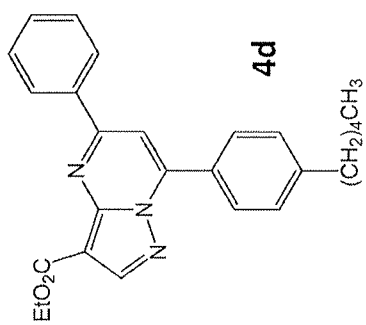

NMR-400 in CDCl<sub>3</sub>  
AR No: ME0311/1933  
Date: 18th March, 2011

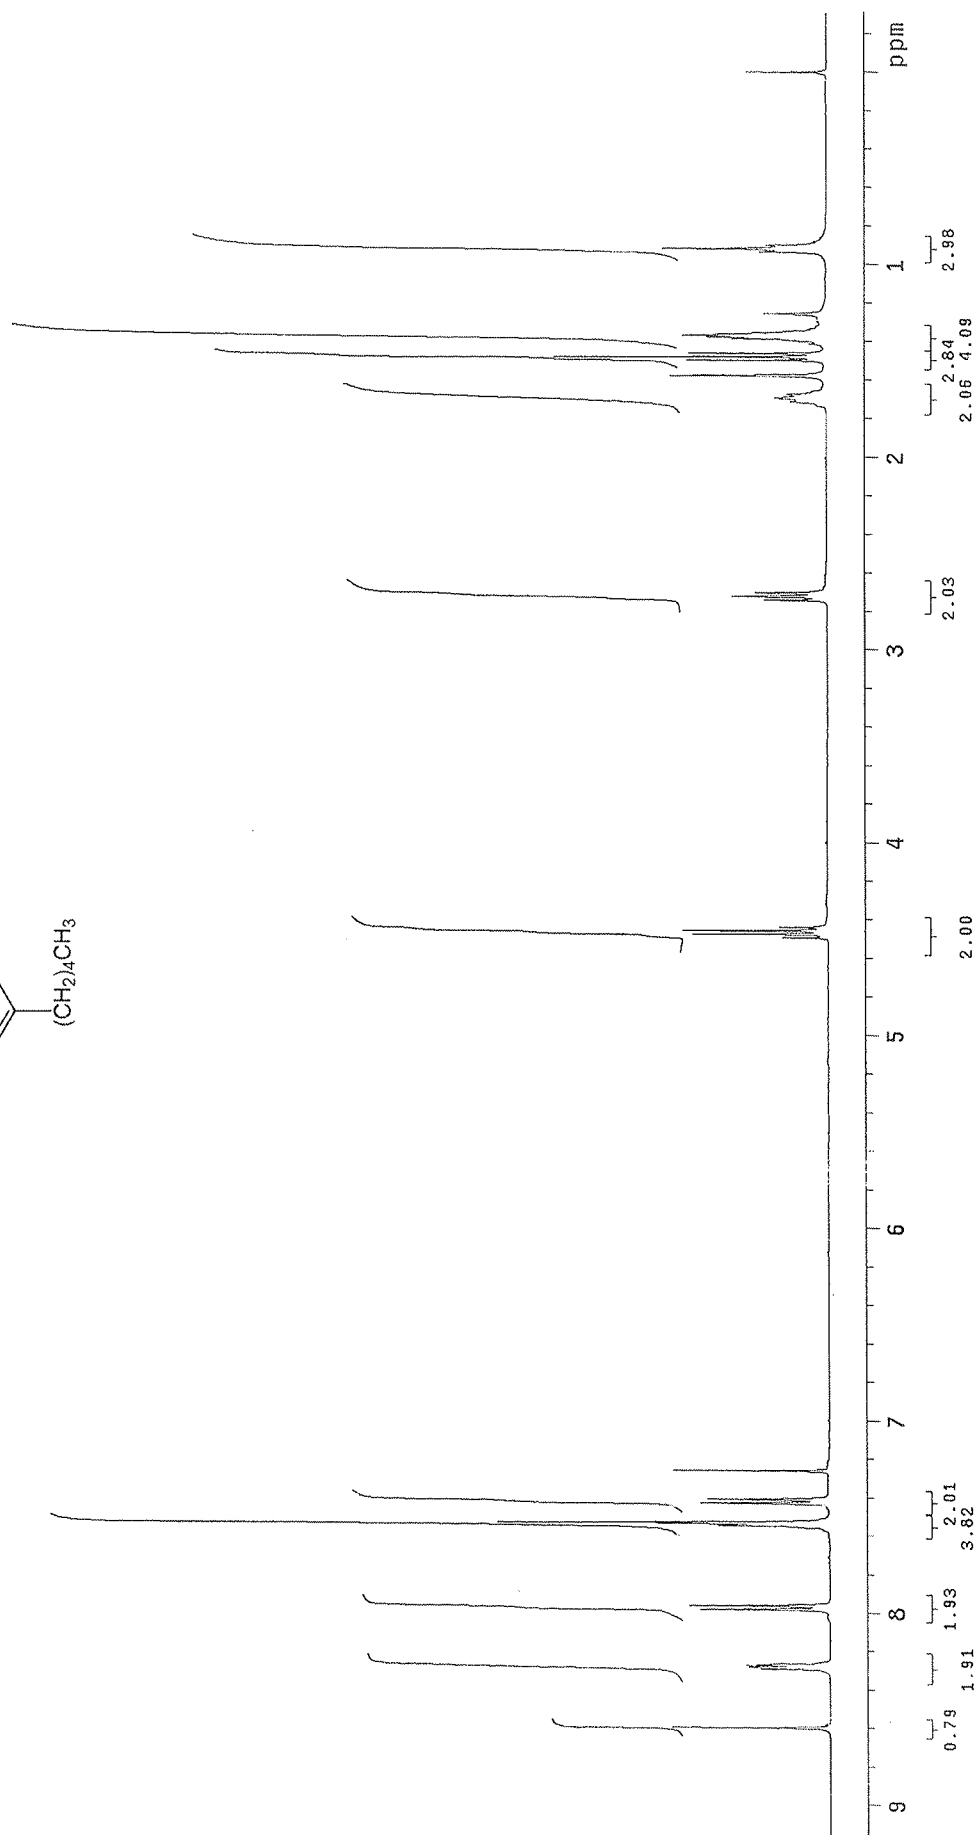

# Copies of <sup>1</sup>H NMR

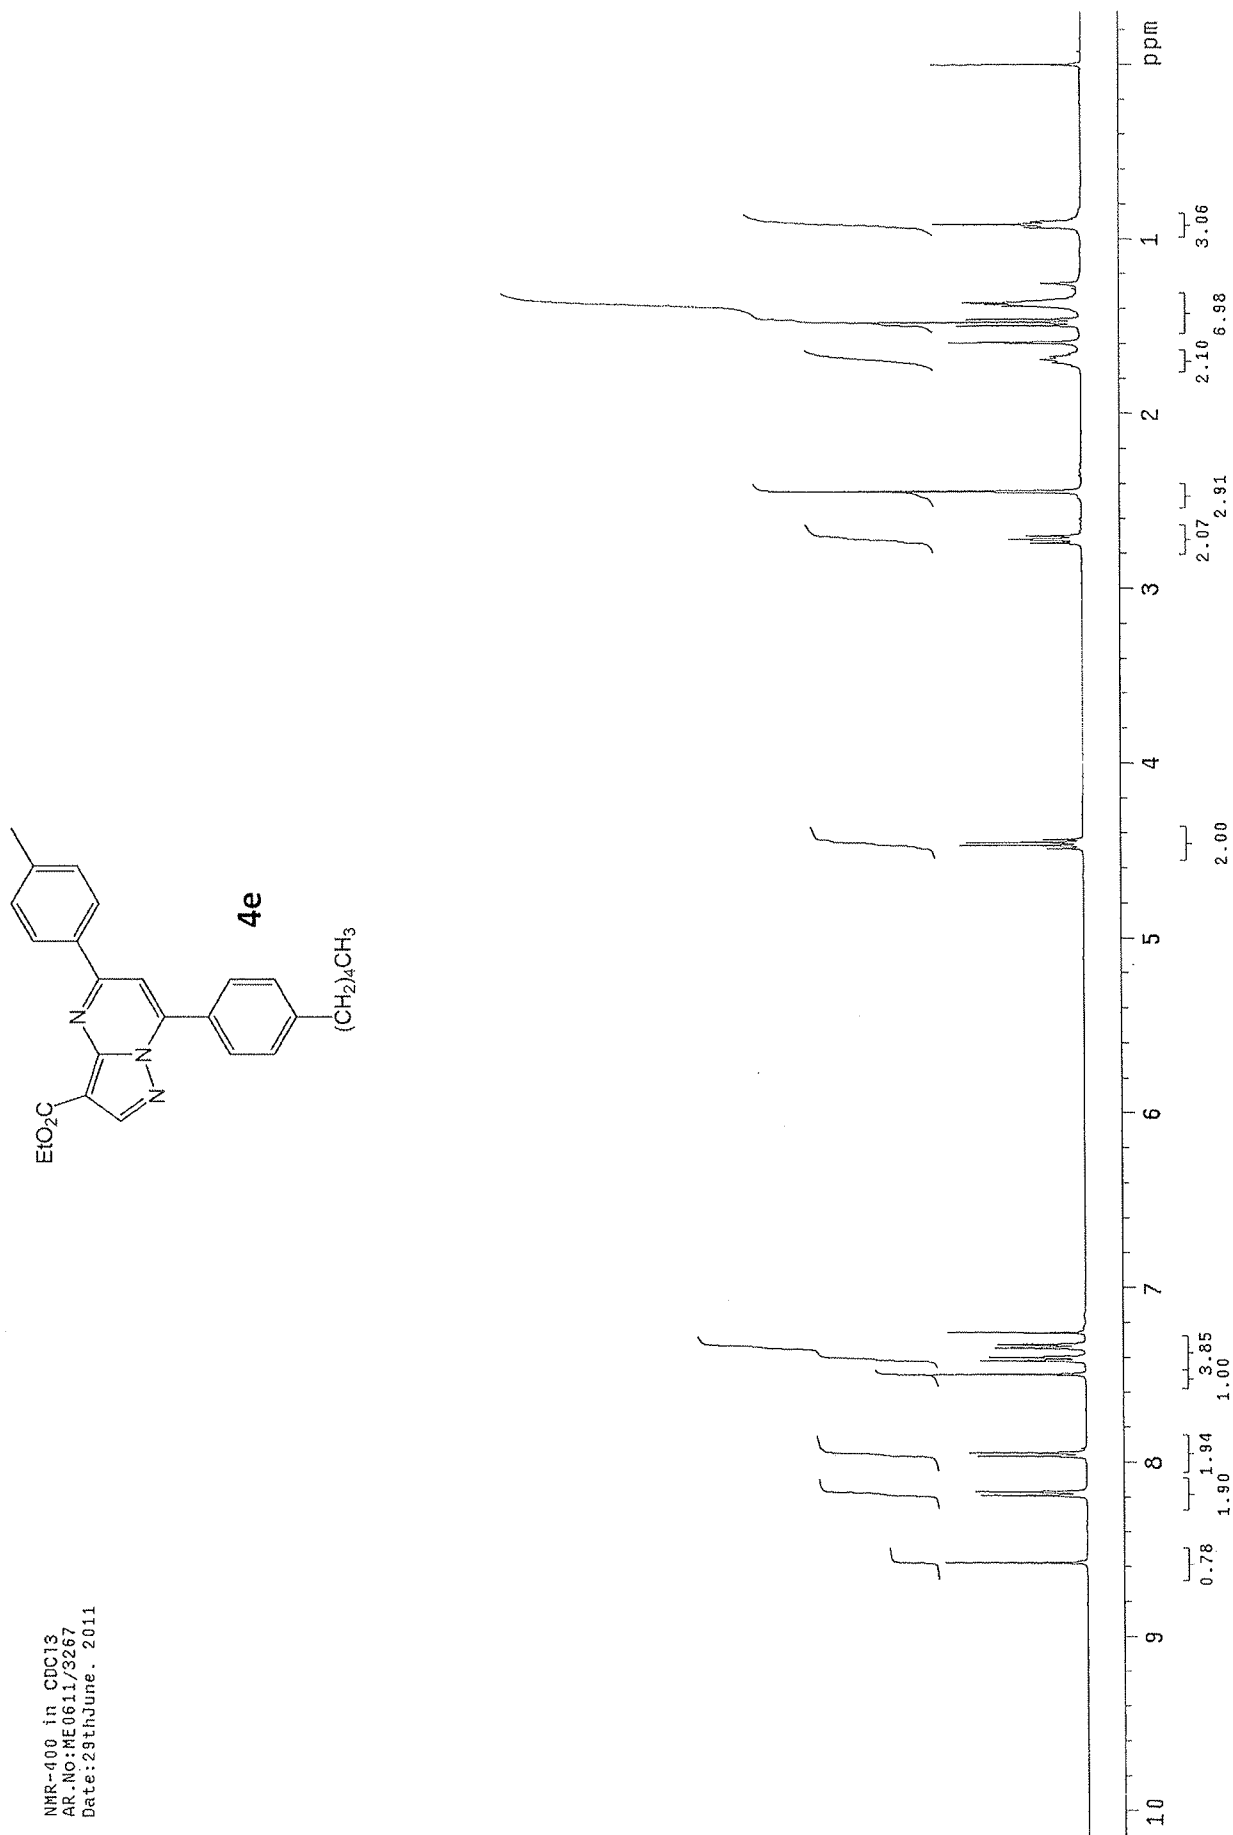

# Copies of <sup>1</sup>H NMR

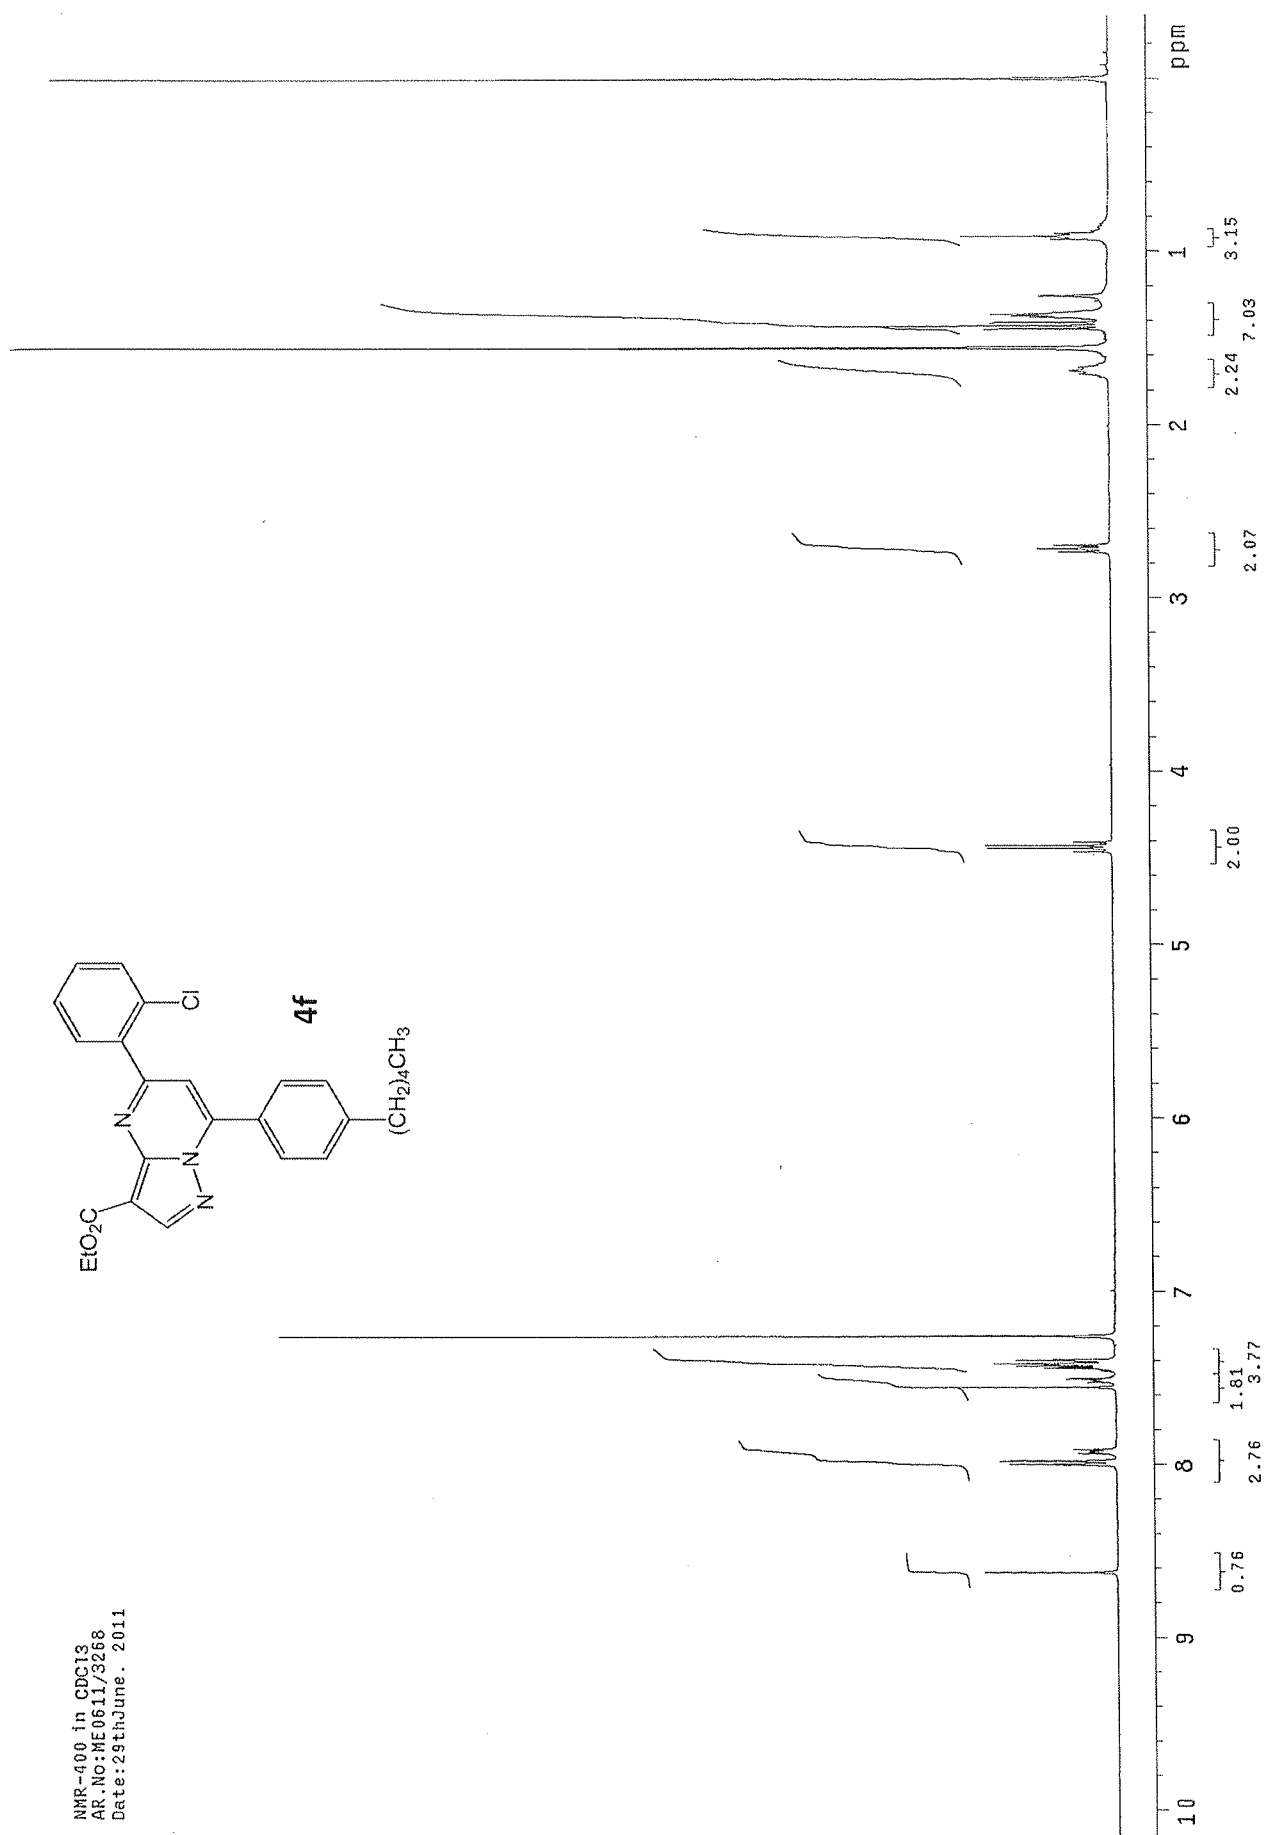

NMR-400 in CDCl<sub>3</sub>  
AK.No: ME0611/3268  
Date: 29th June, 2011

# Copies of <sup>1</sup>H NMR

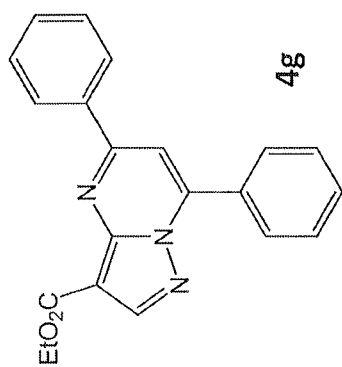

4g

NMR-400 in CDCl<sub>3</sub>  
AK.No:ME0311/1784  
Date: 17th March. 2011

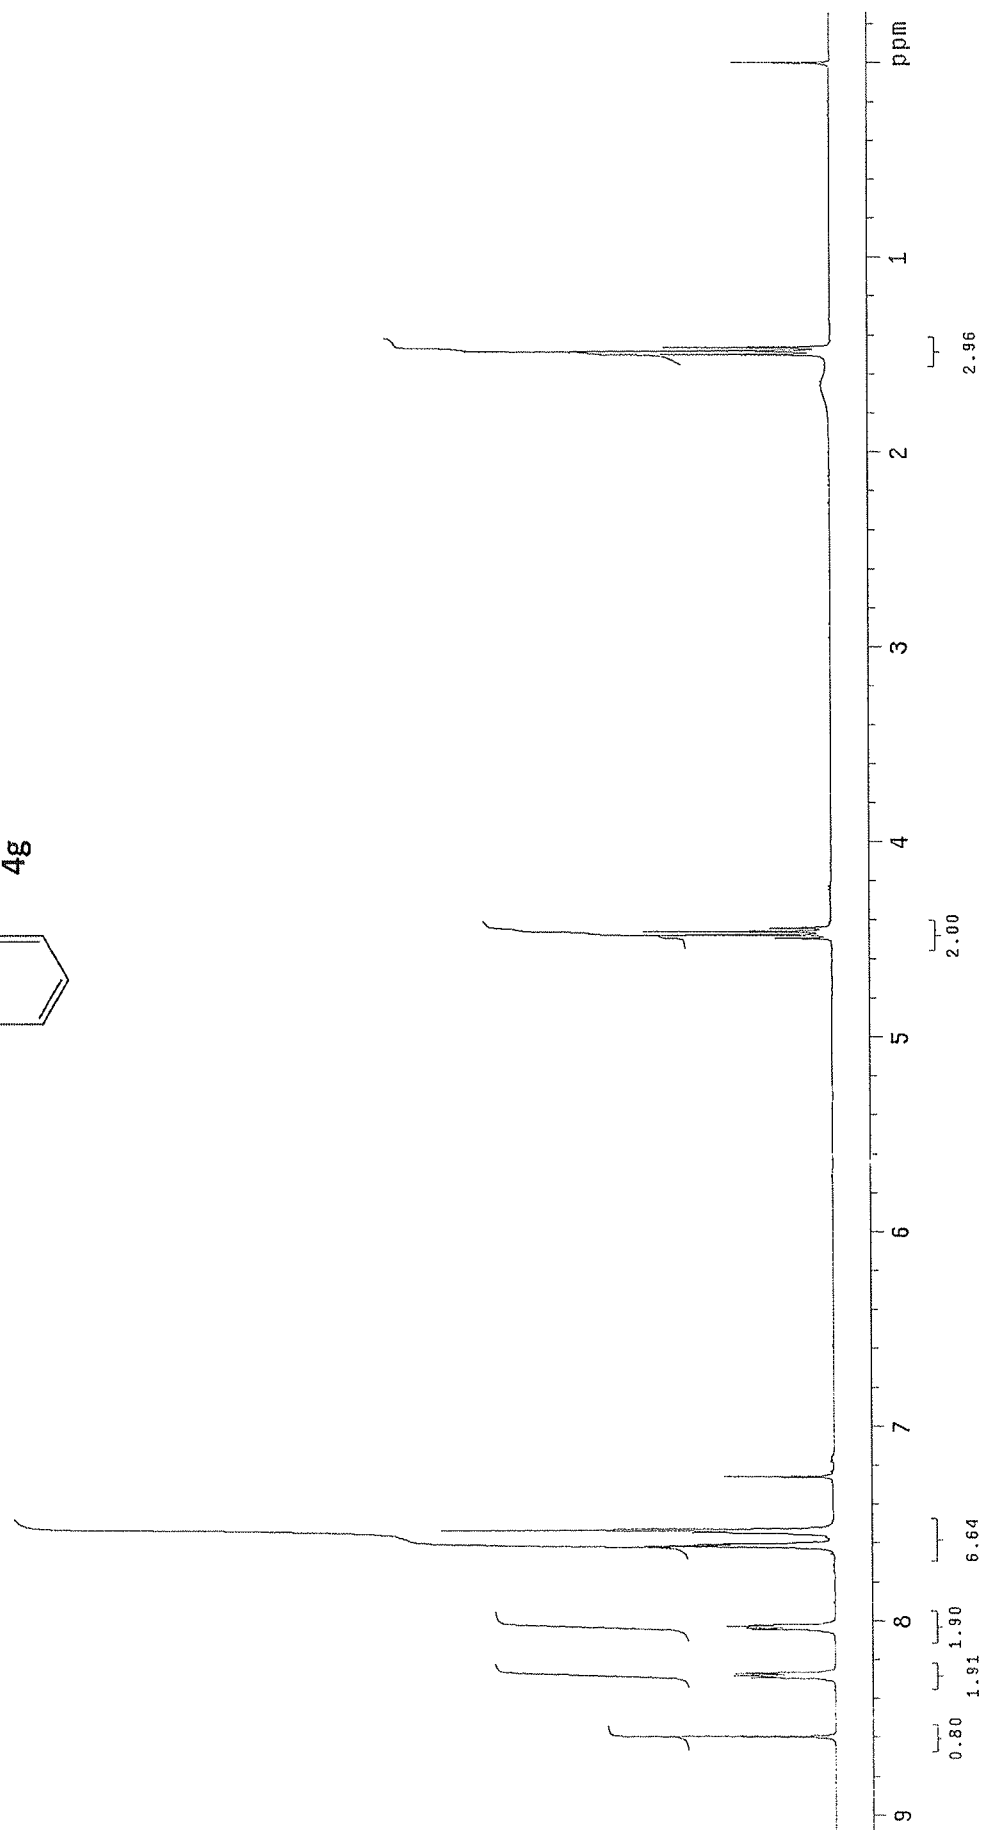

# Copies of <sup>1</sup>H NMR

NMR-400 in CDCl<sub>3</sub>  
AR.No:ME0411/2166  
Date: 21 st April. 2011

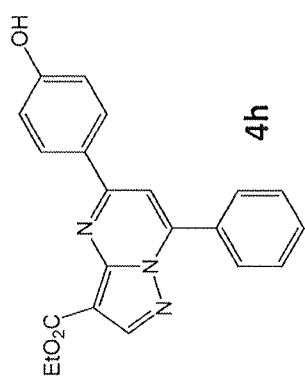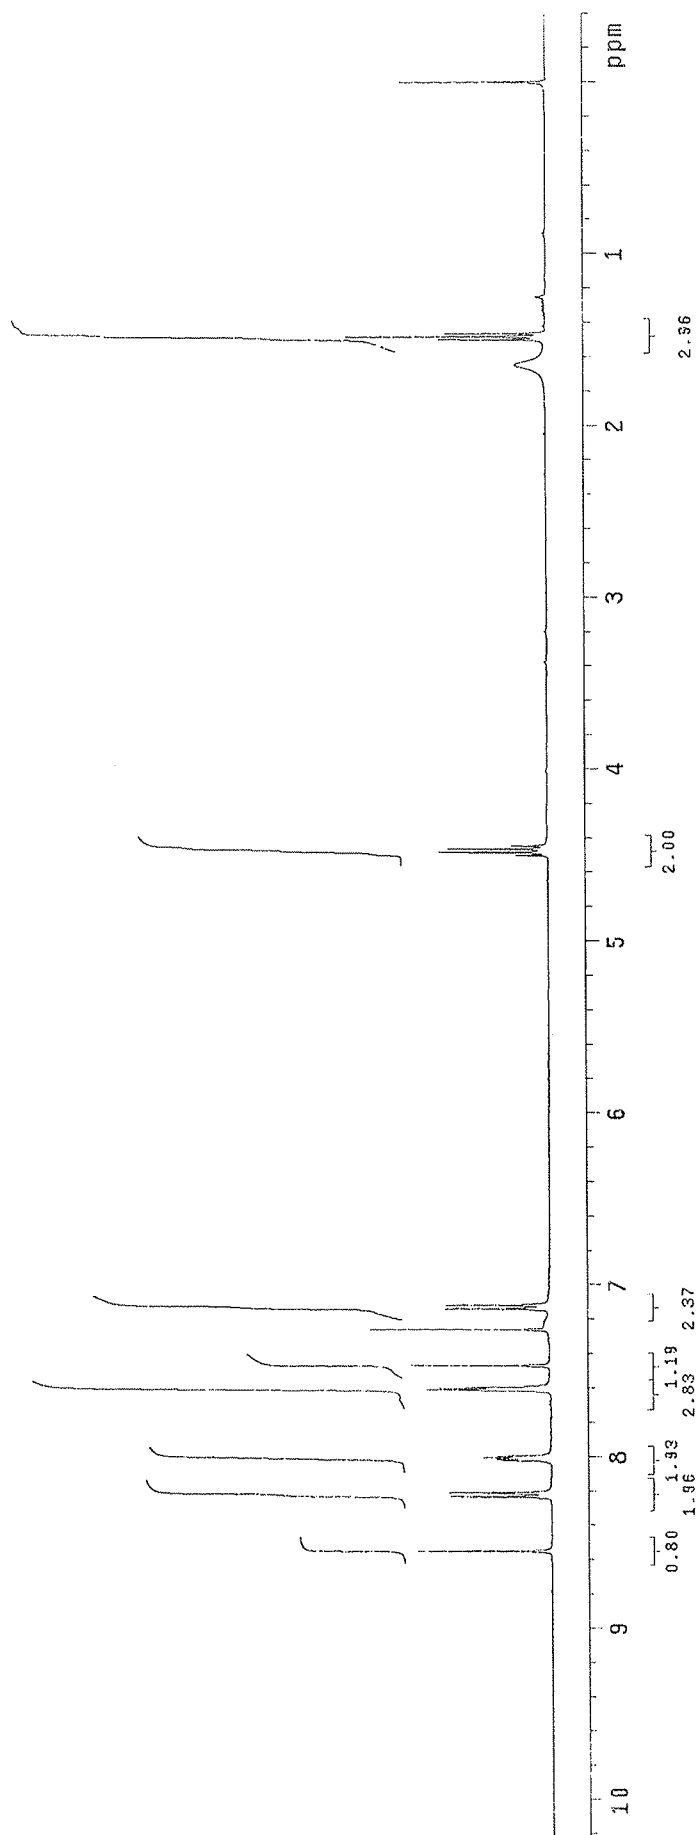



# Copies of <sup>1</sup>H NMR

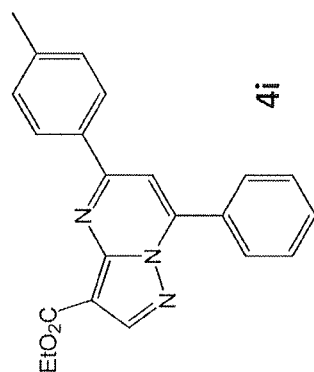

4i

NMR-400 in CDCl<sub>3</sub>  
AR.No:ME0311/2938  
Date: 25 th March, 2011

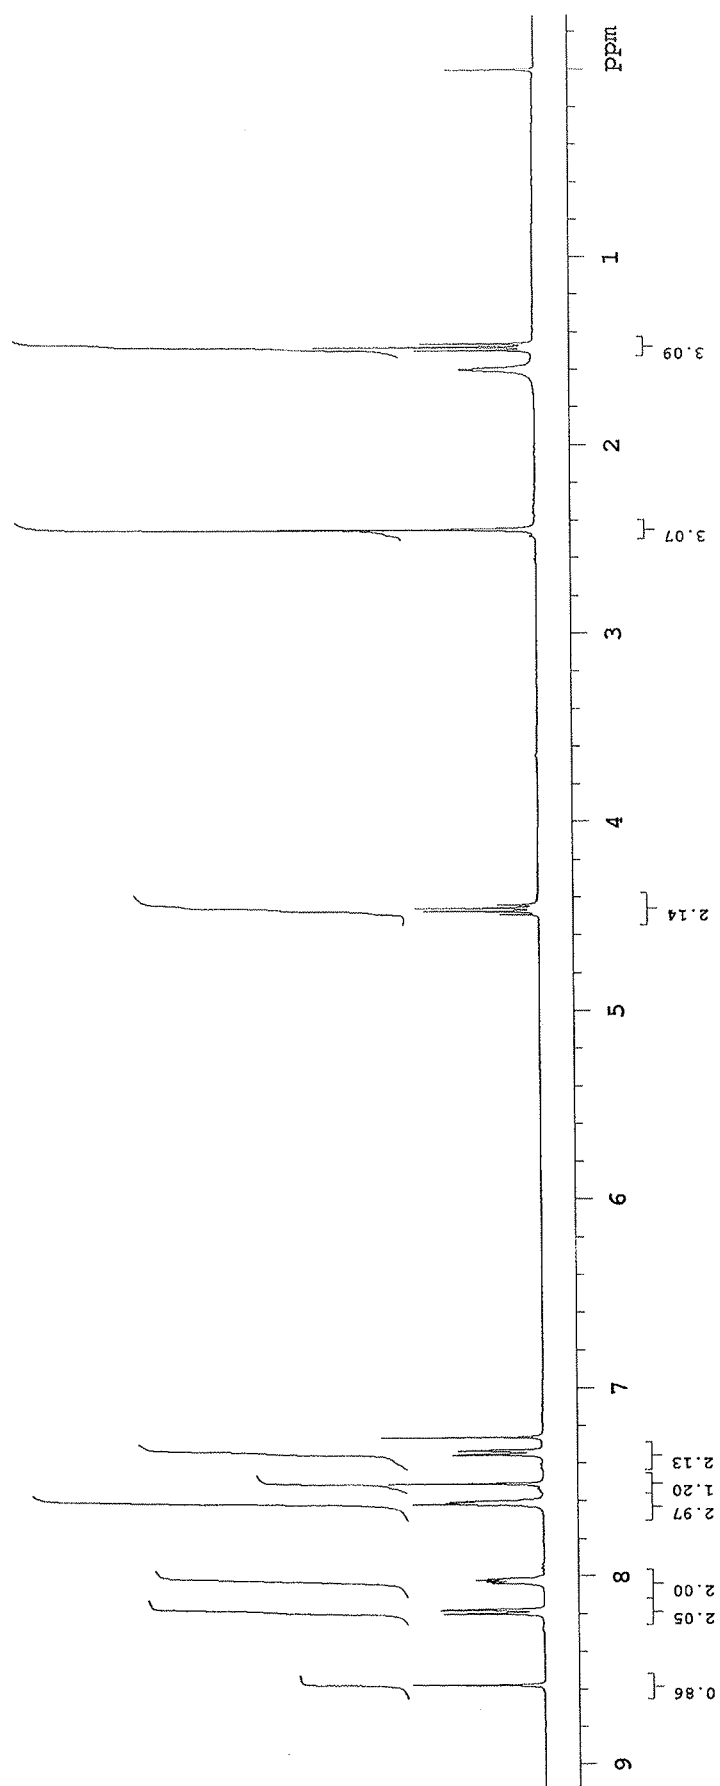

# Copies of <sup>1</sup>H NMR

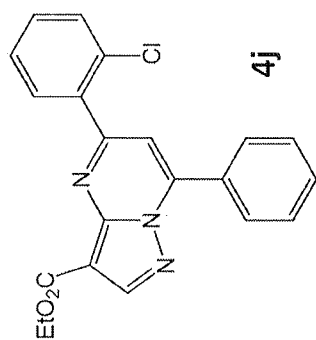

NMR-400 in CDCl<sub>3</sub>  
AR.NO:ME0411/2167  
Date: 21 st April, 2011

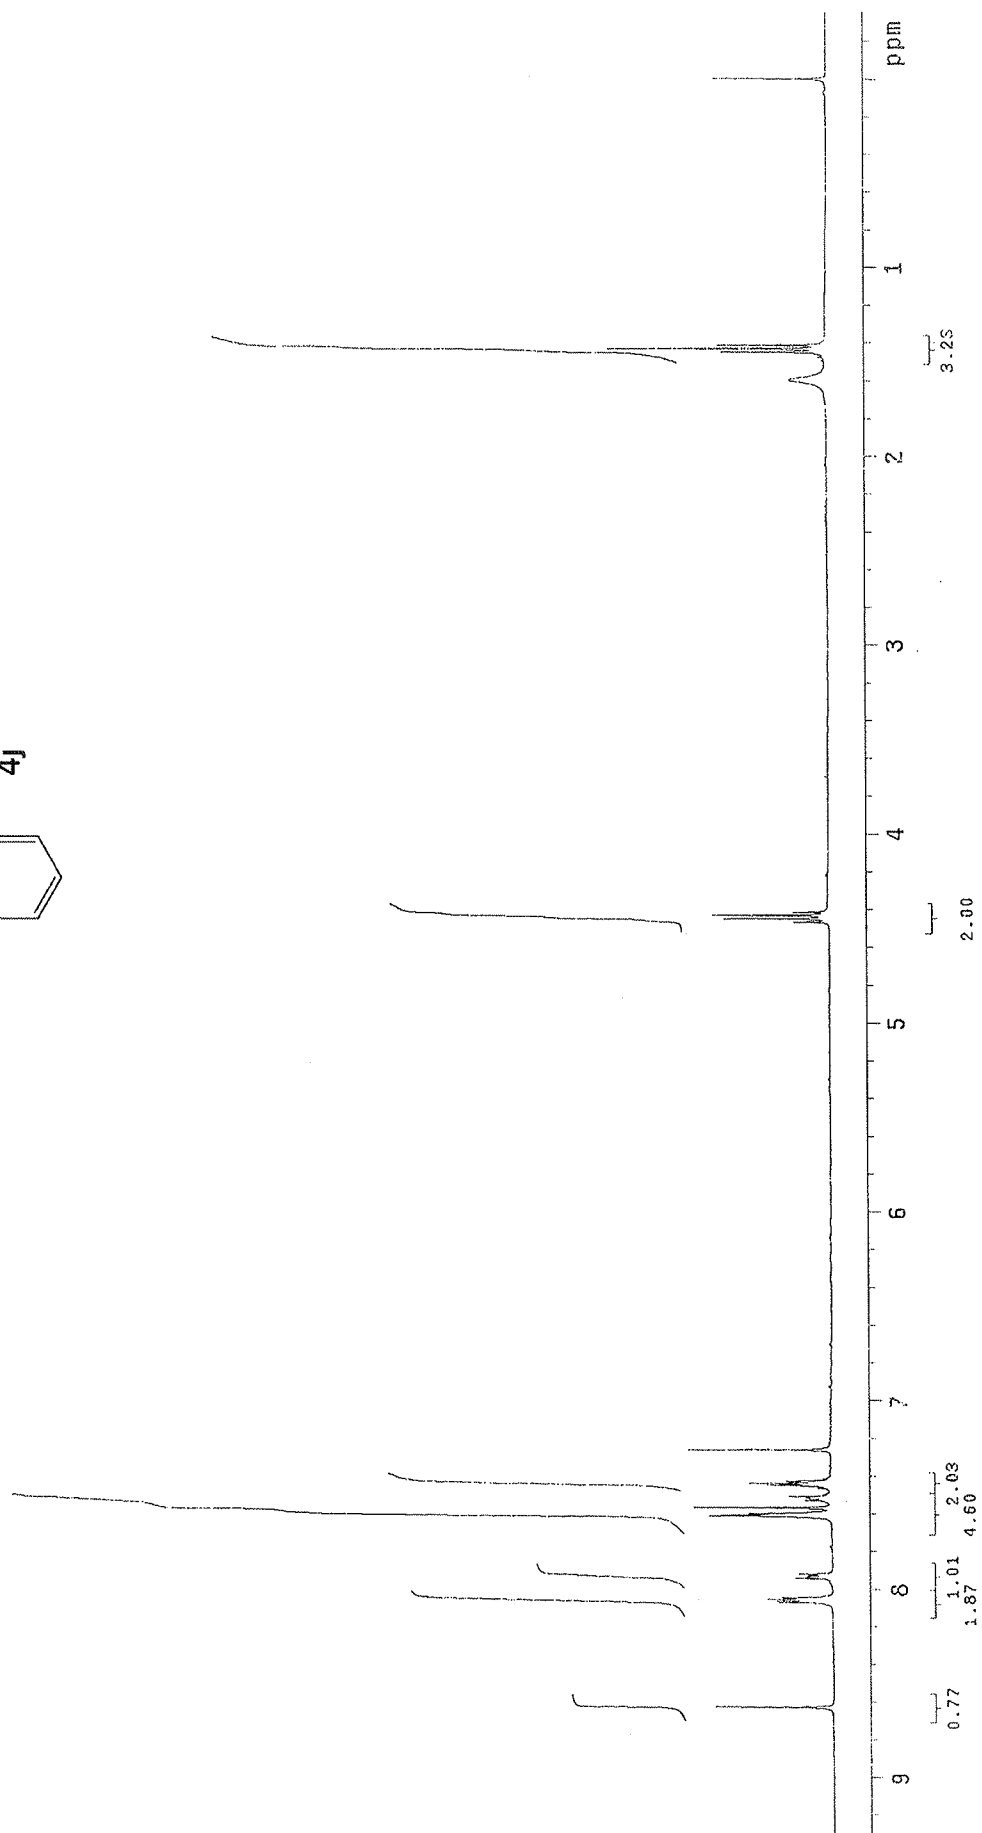

# Copies of <sup>1</sup>H NMR

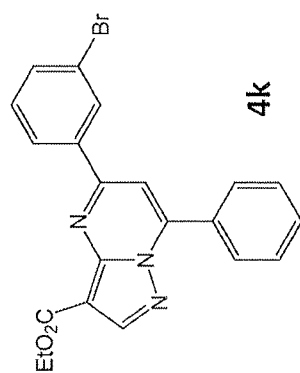

4k

NMR-400 in CDCl<sub>3</sub>  
AR.No:ME0511/1925  
Date: 18th May. 2011

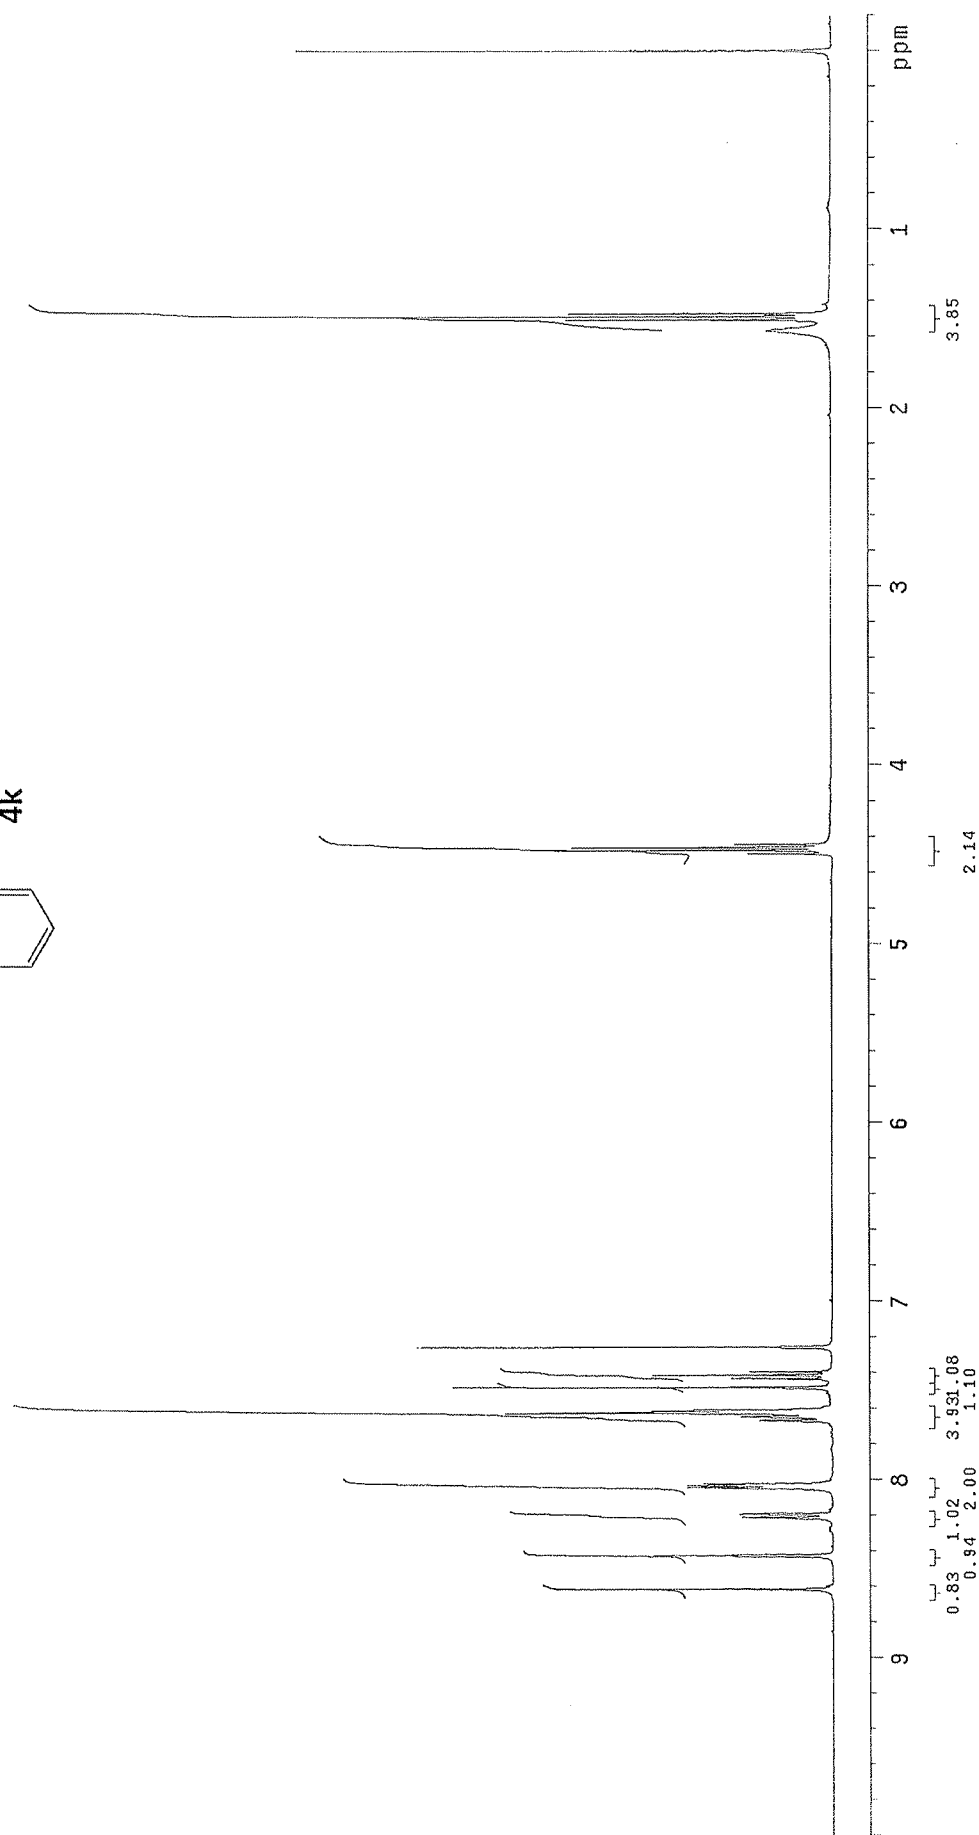

# Copies of <sup>1</sup>H NMR

NMR-400 in CDCl<sub>3</sub>  
AK.NO:ME0411/2168  
Date: 21 st April. 2011

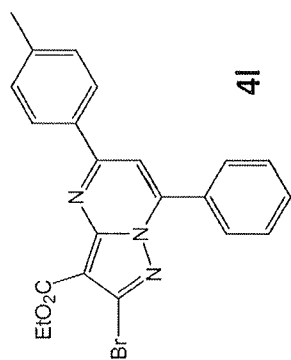

4I

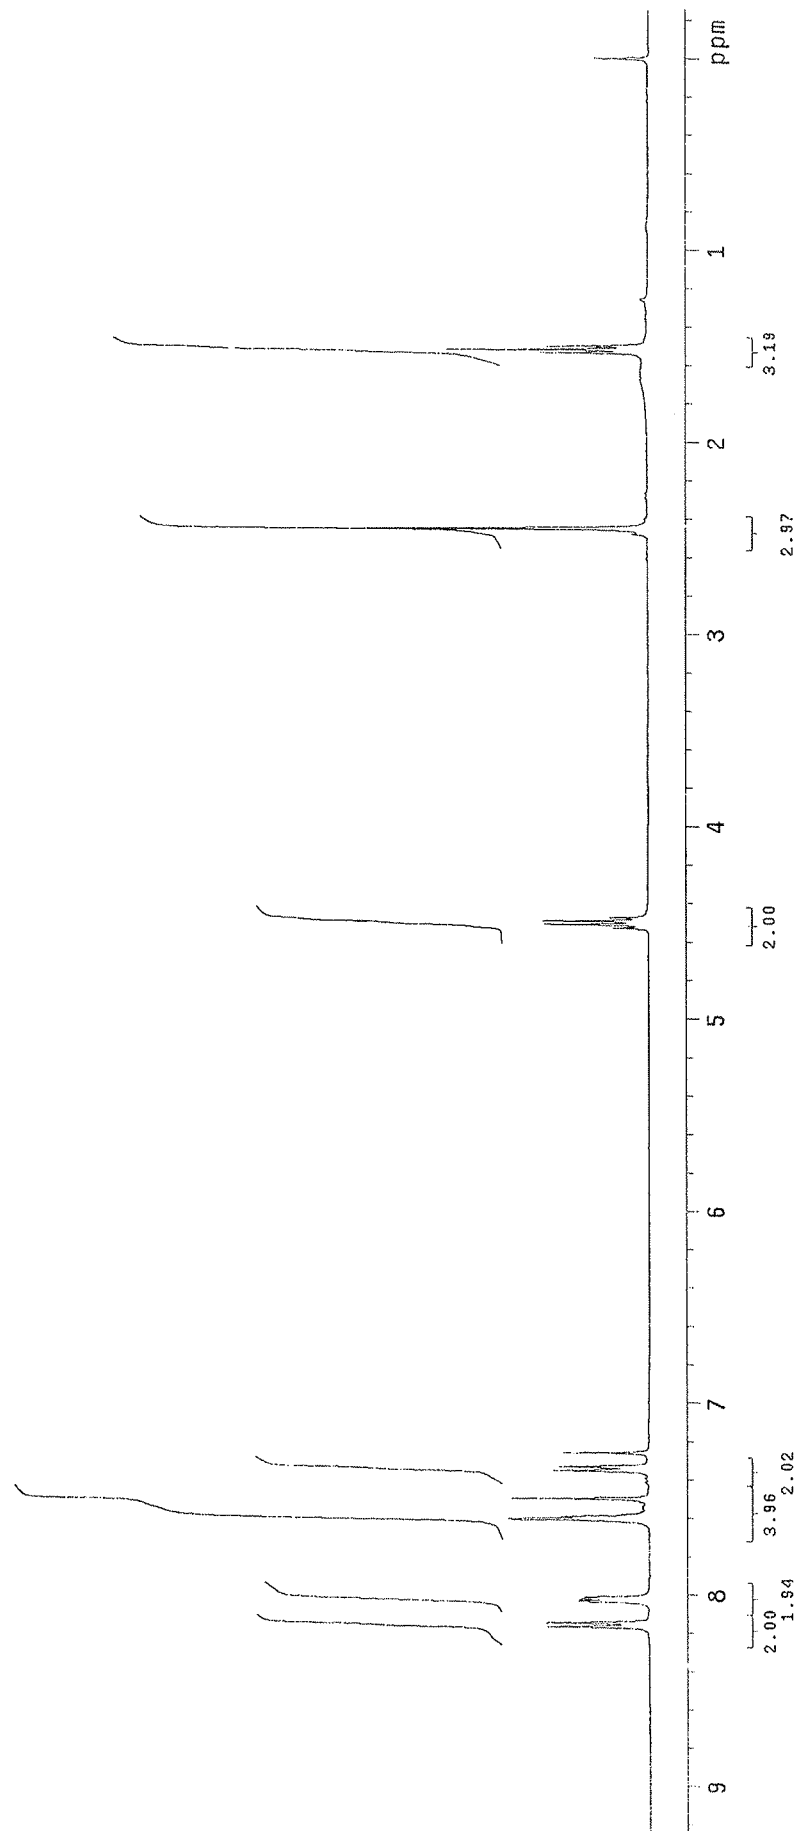

# Copies of <sup>1</sup>H NMR

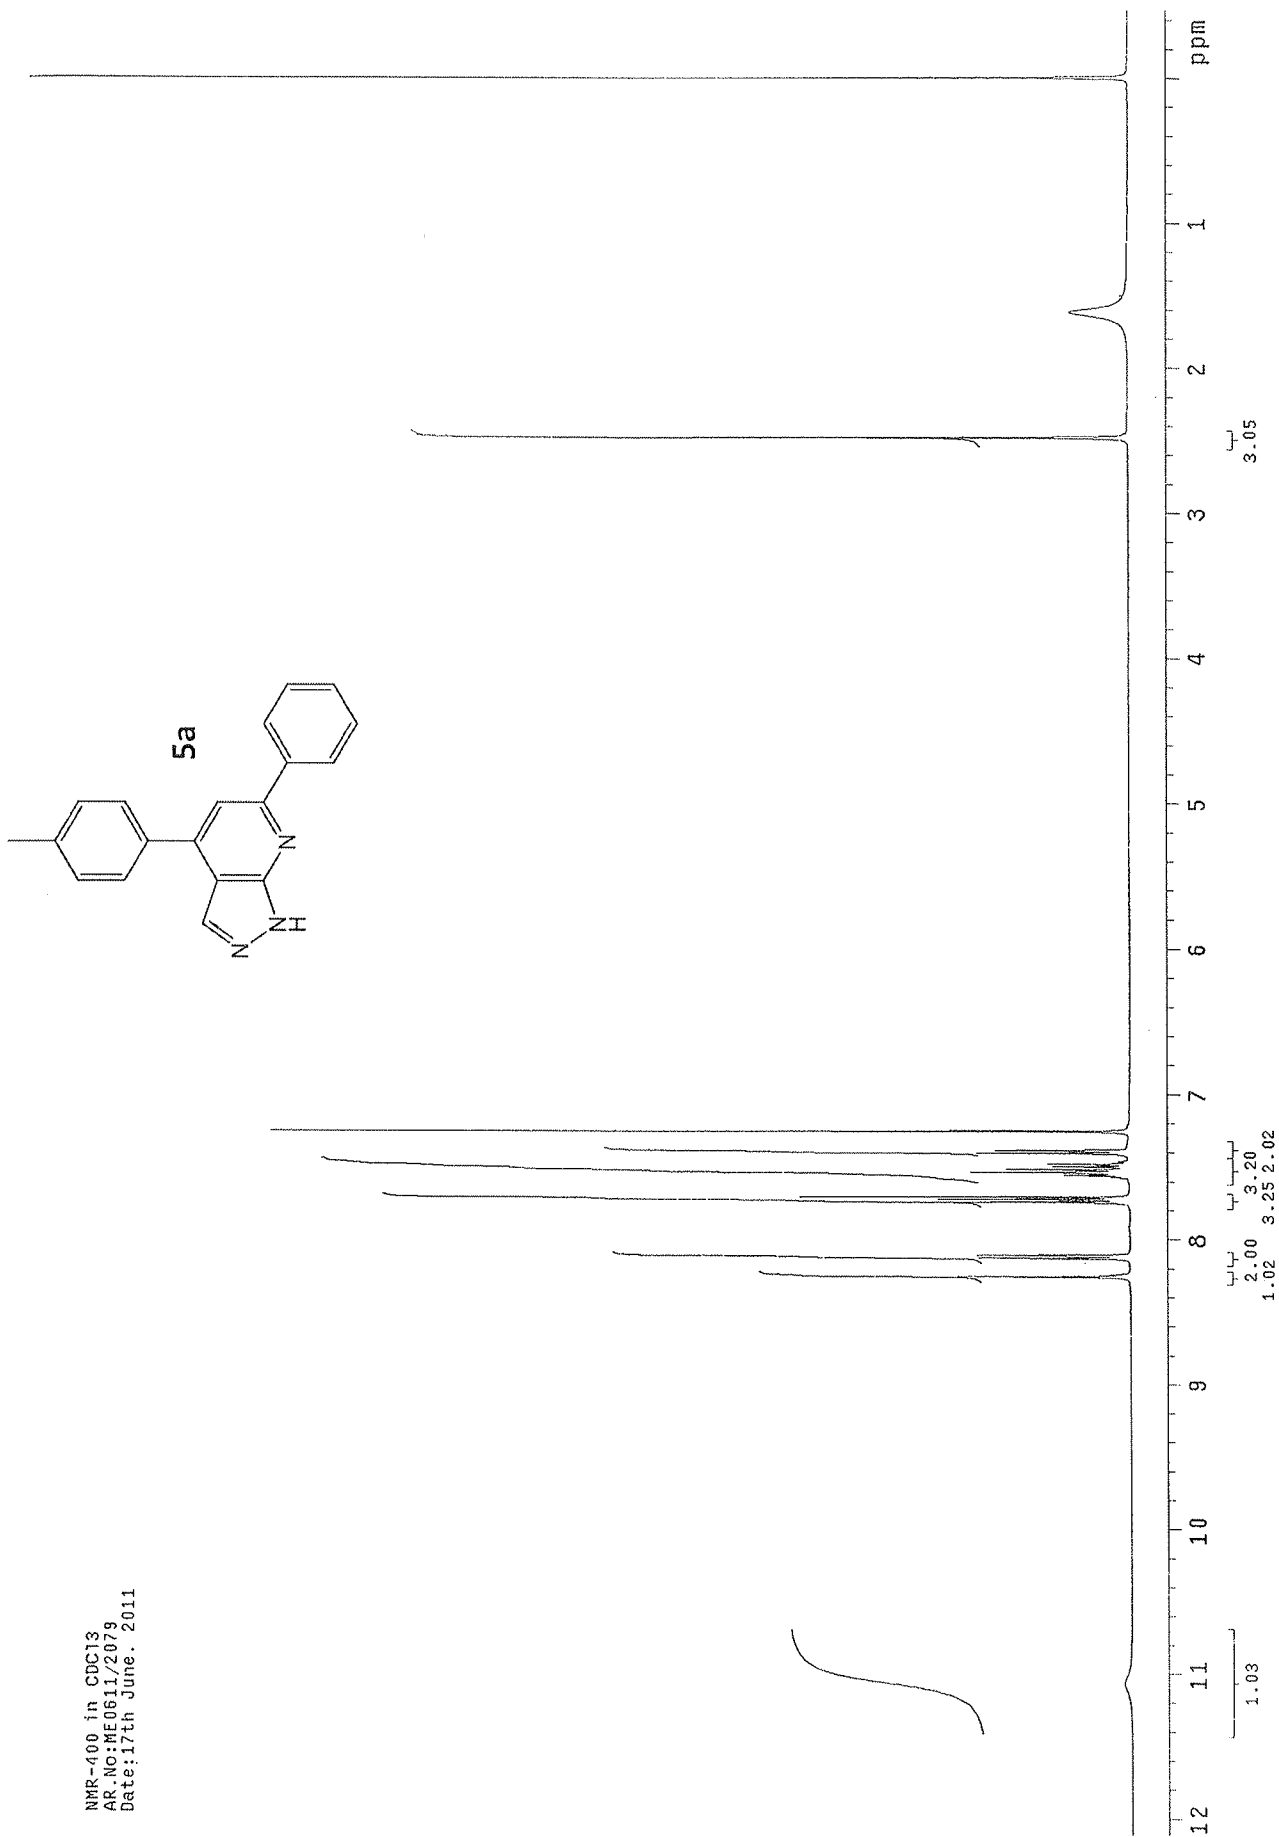

# Copies of <sup>1</sup>H NMR

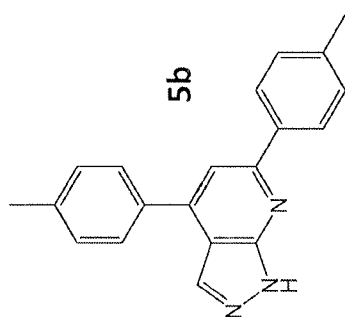

NMR-400 in CDCl<sub>3</sub>  
AK.NO:ME0711/43  
Date:01st July.2011

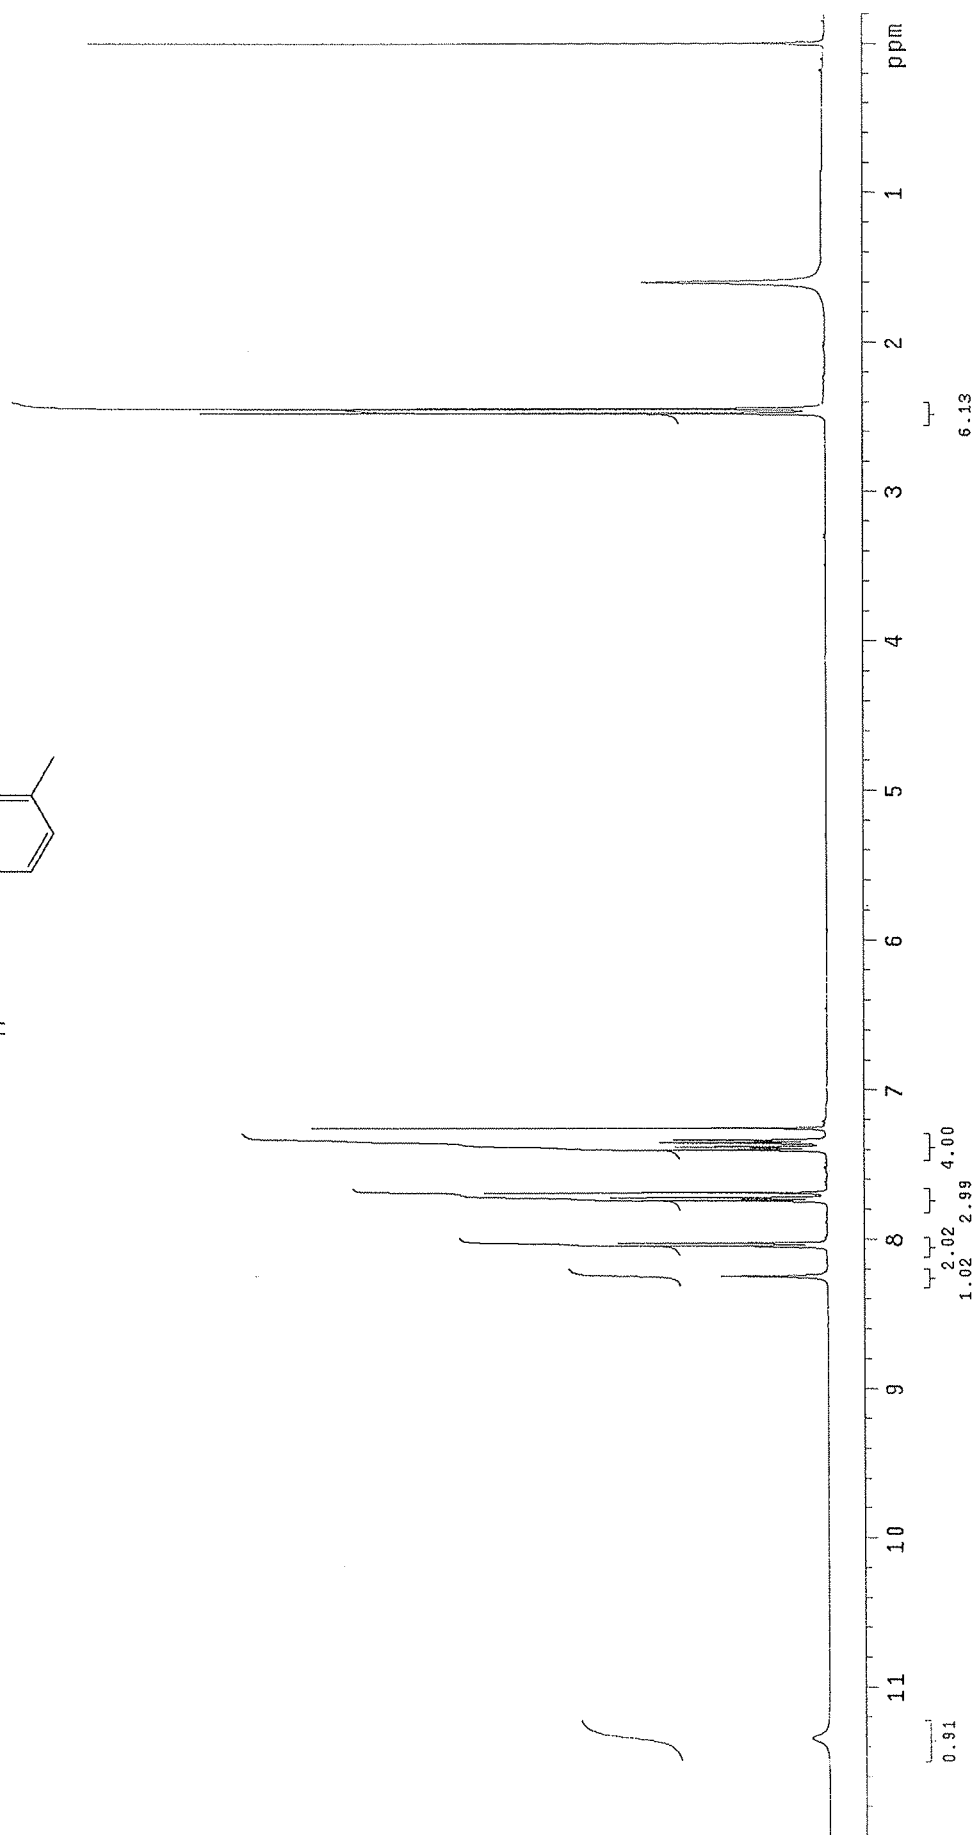

# Copies of <sup>1</sup>H NMR

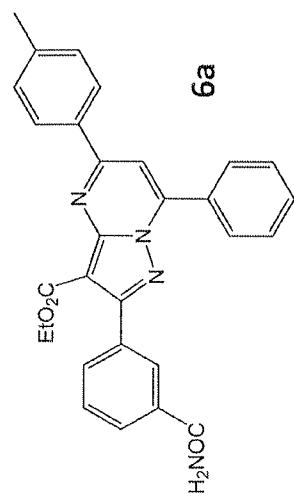

NMR-400MHZ in CDCl<sub>3</sub>  
AR.No:ME0511/12S  
Date: 05th Sep.2011

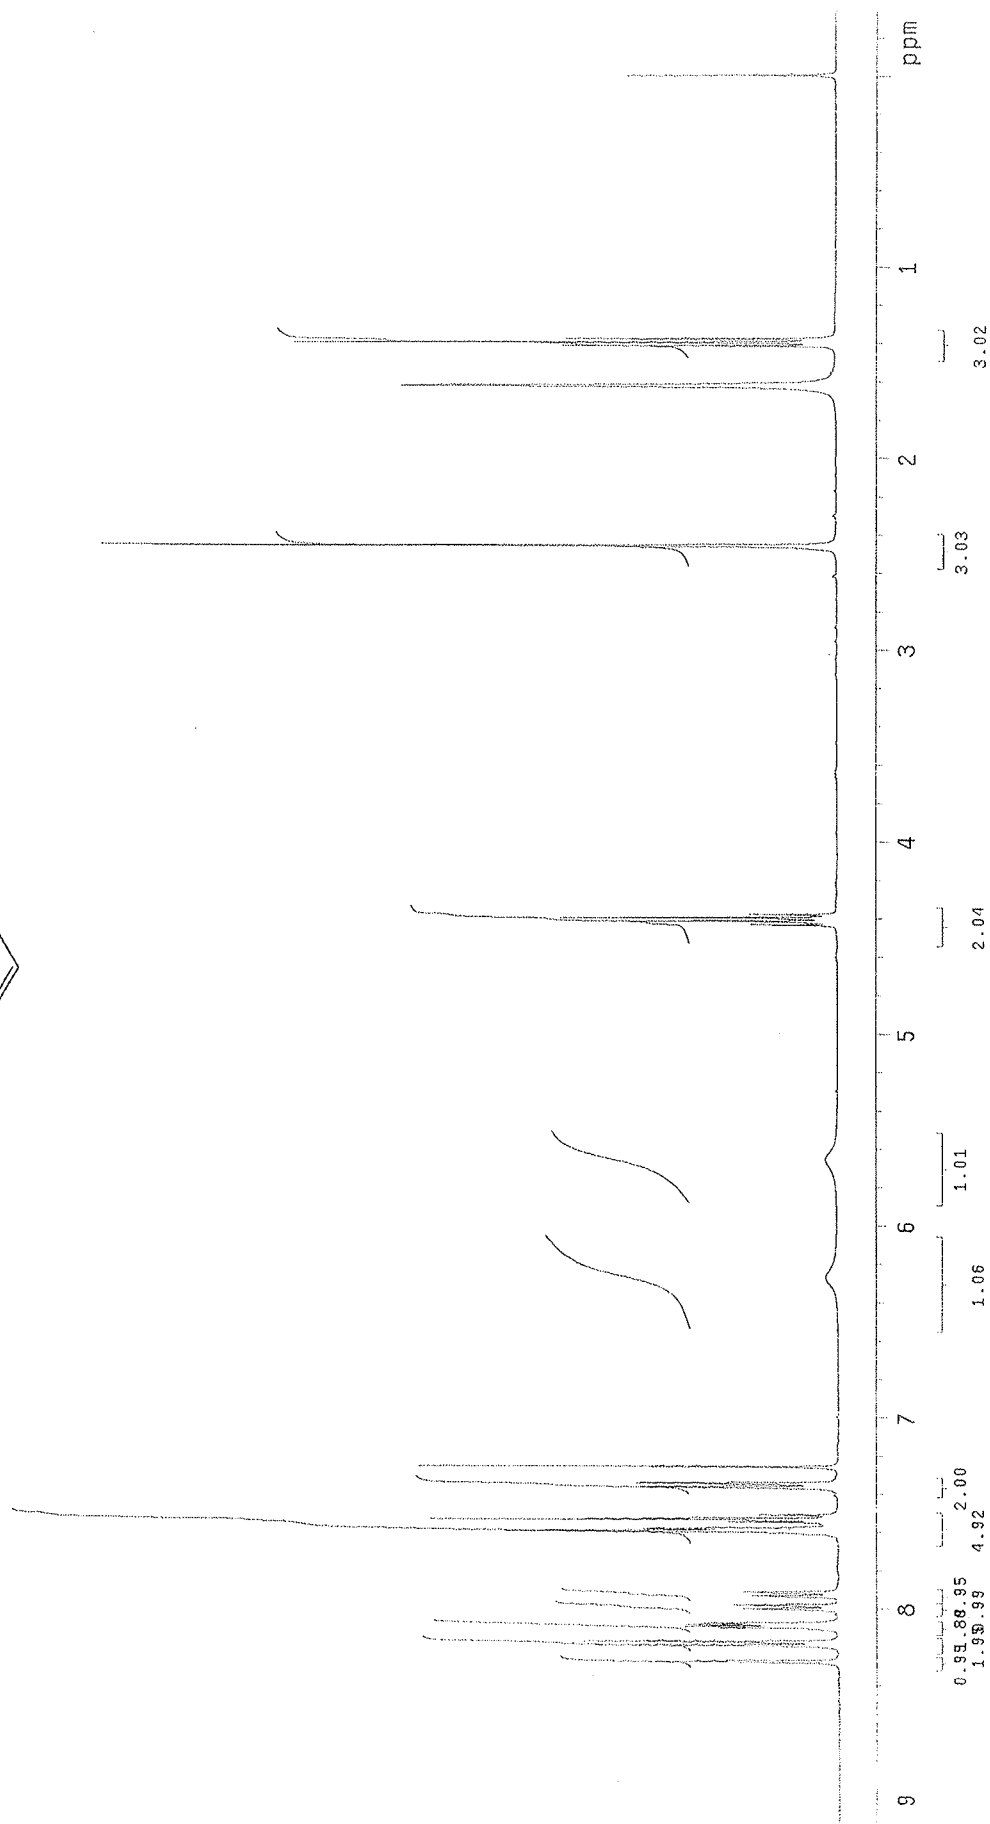

# Copies of <sup>1</sup>H NMR

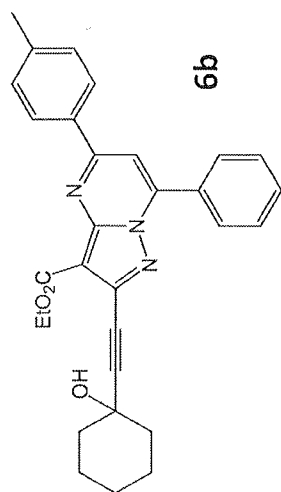

NMR-400MHZ in CDCl<sub>3</sub>  
AR.No:ME0911/126  
Analyt: Haribabu  
Date: 05th Sep.2011

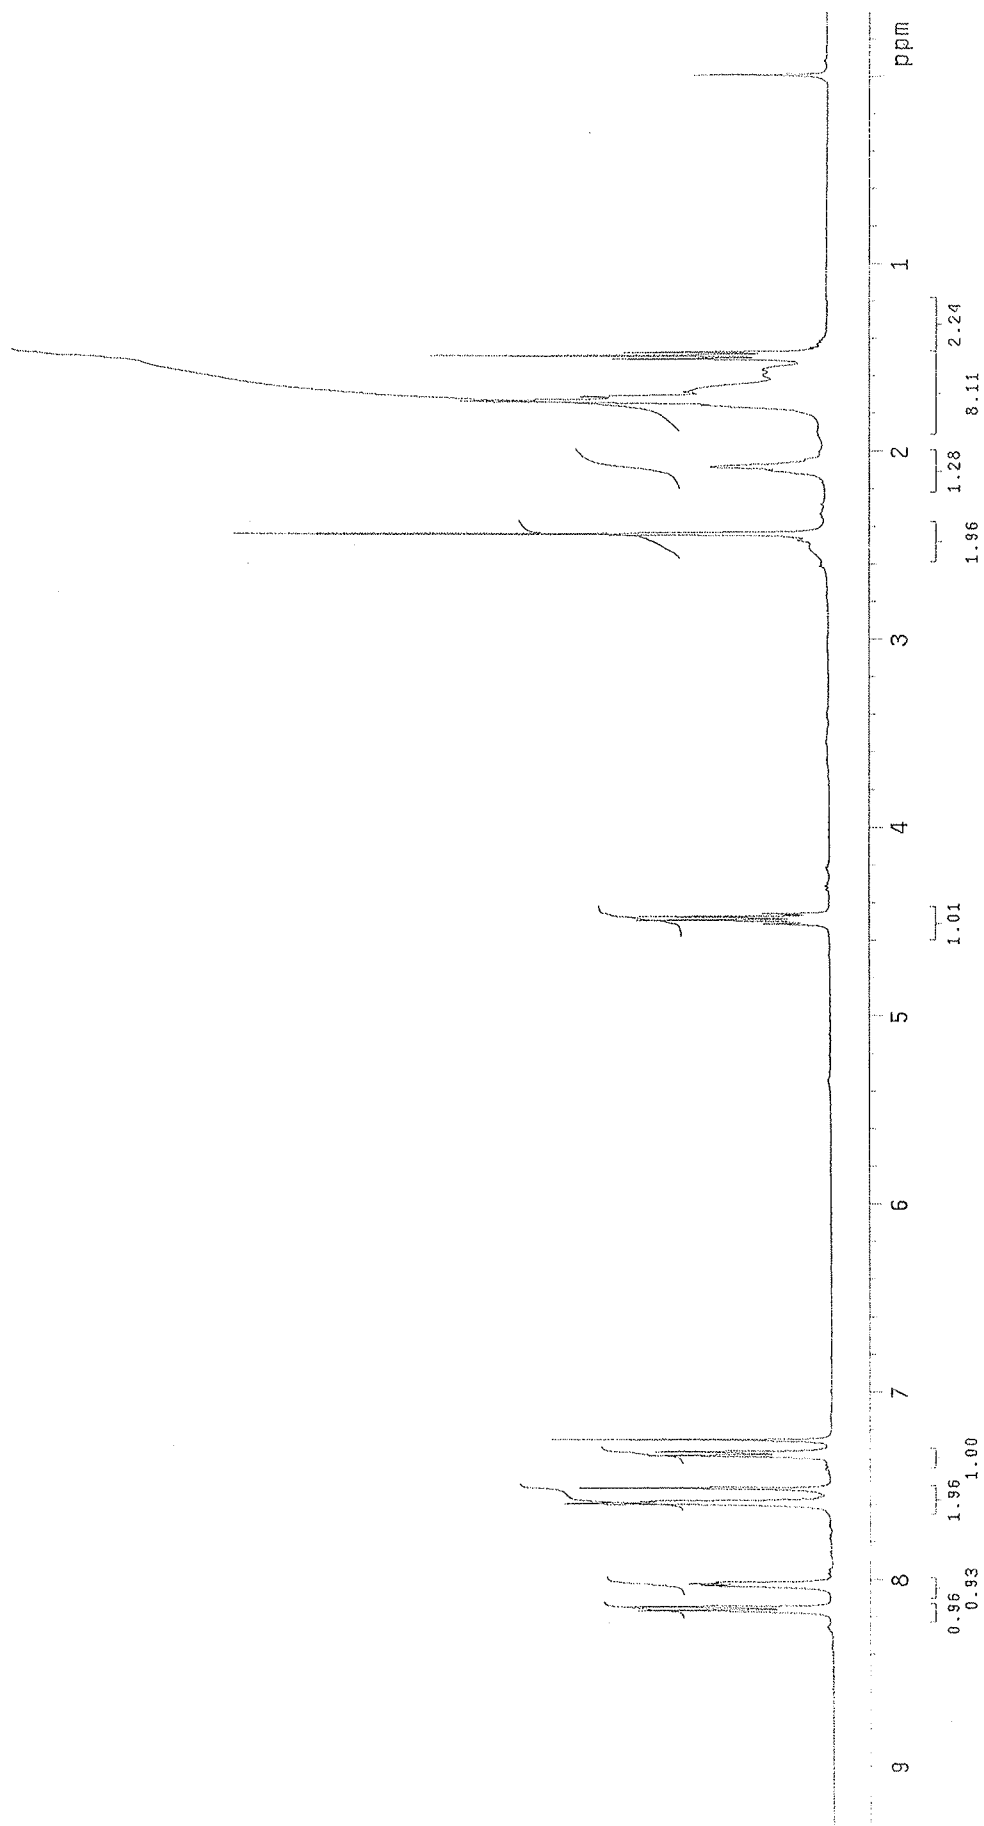



# Copies of $^{13}\text{C}$ NMR

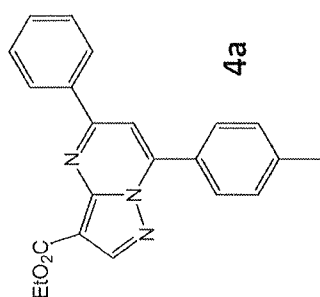

NMR-400 in  $\text{CDCl}_3$   
AR.NO:ME0411/3039  
Date: 30 th April, 2011

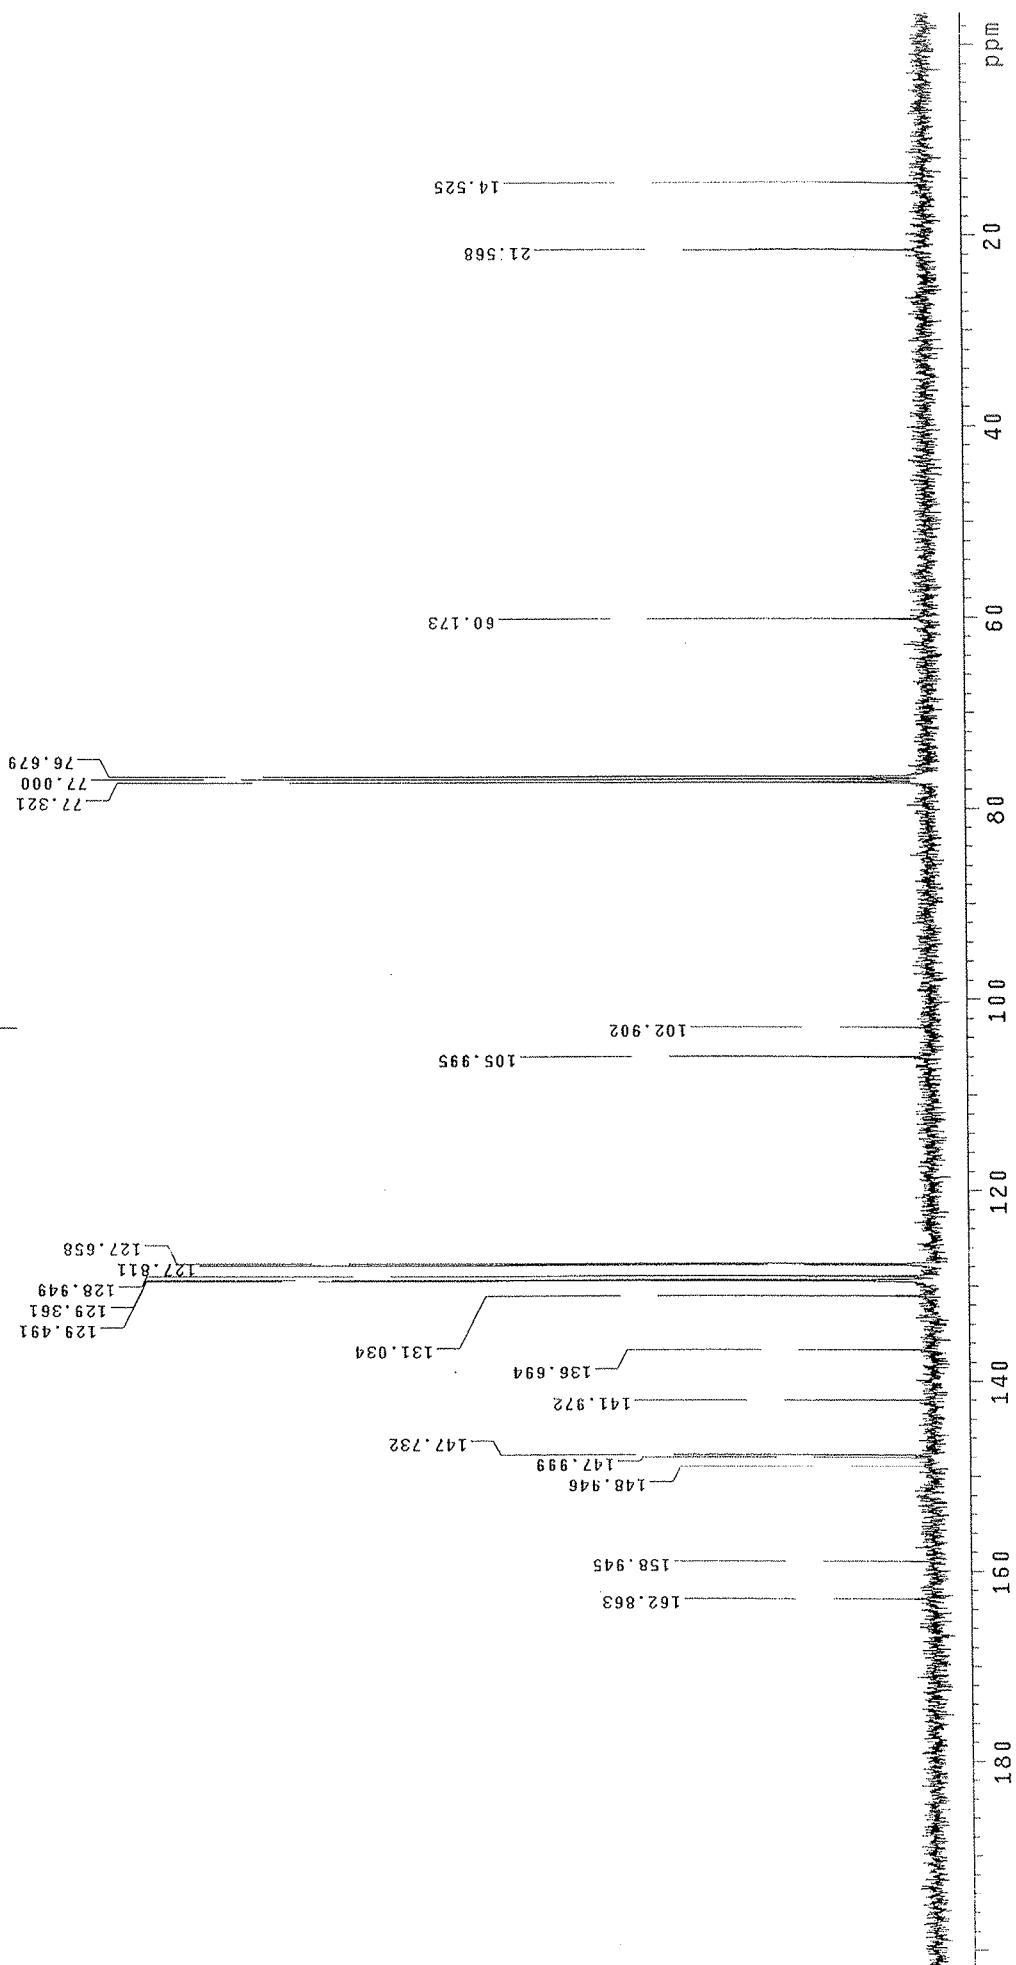

# Copies of $^{13}\text{C}$ NMR

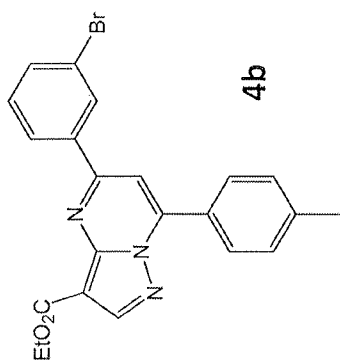

NMR-400 in  $\text{CDCl}_3$   
AR.No:ME0411/3040  
Date: 30<sup>th</sup> April, 2011

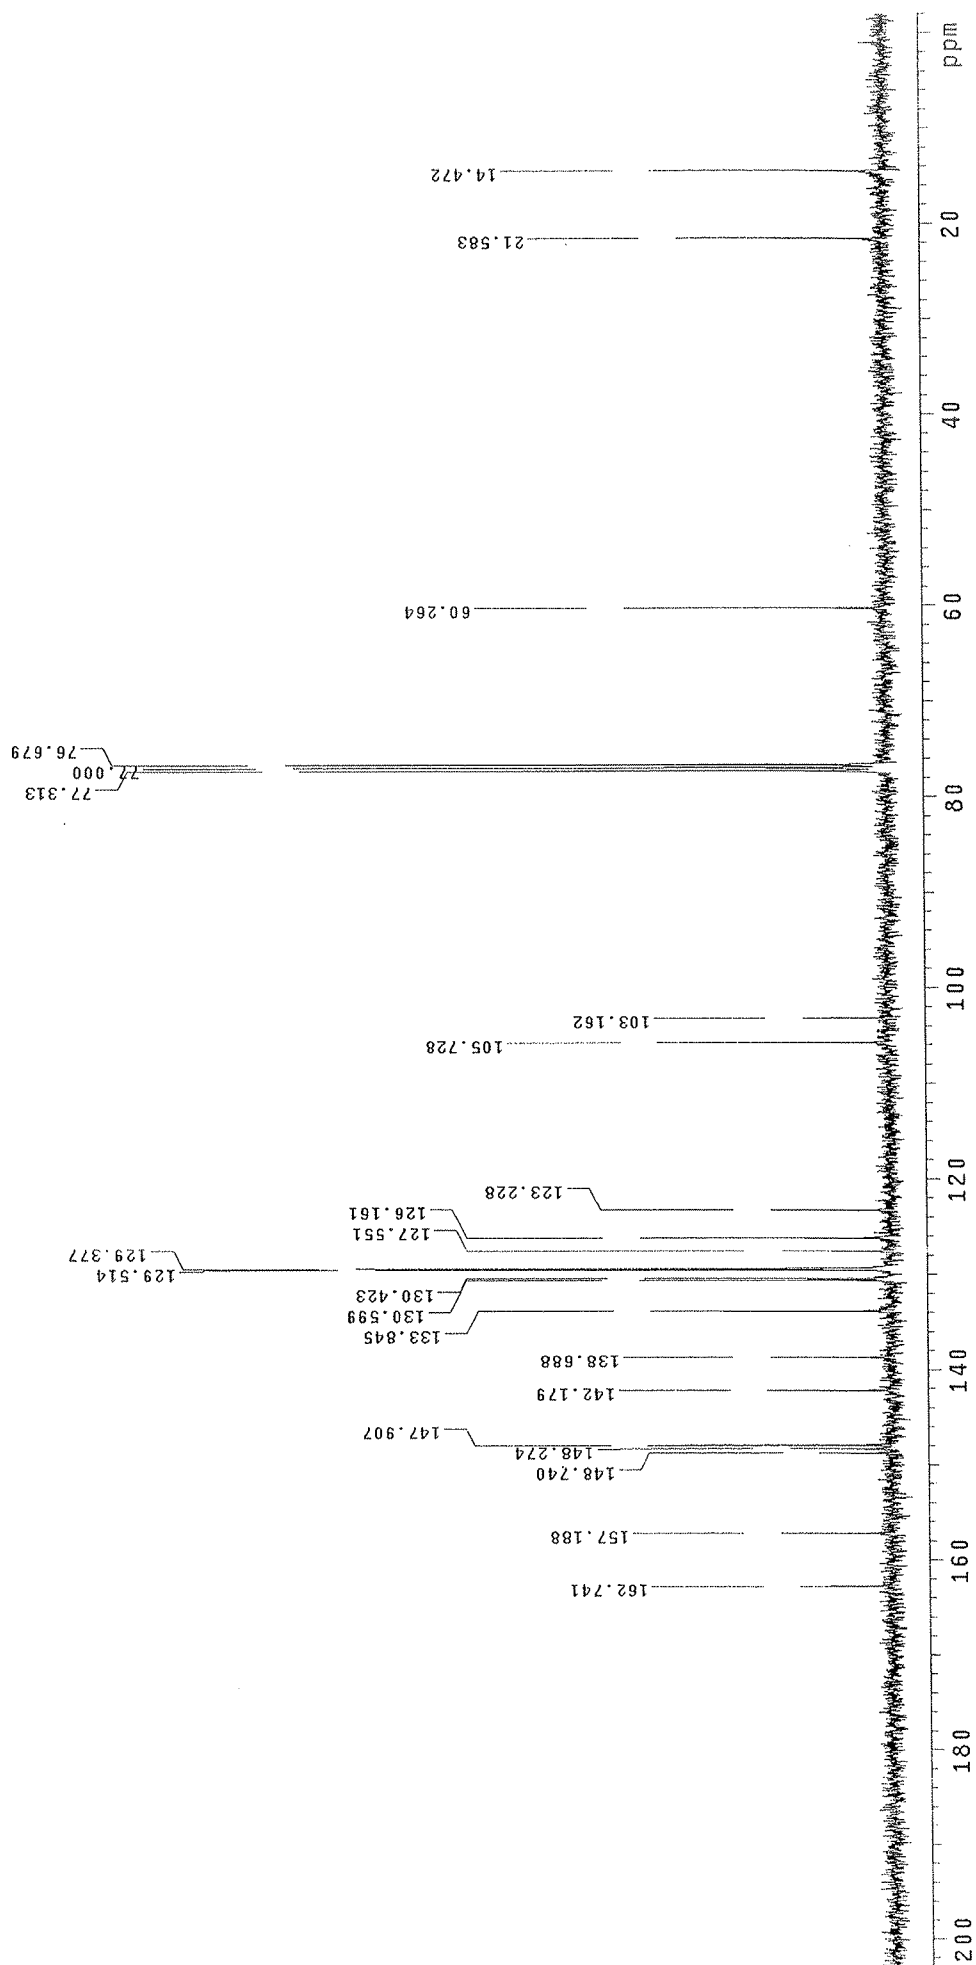

# Copies of $^{13}\text{C}$ NMR

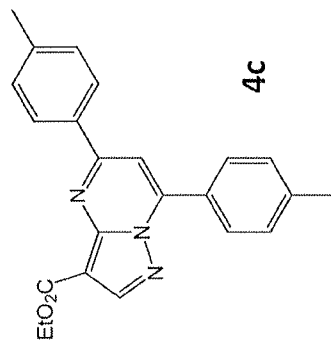

NMR-400 in  $\text{CDCl}_3$   
AK:ME0411/3041  
Date: 30 th April, 2011

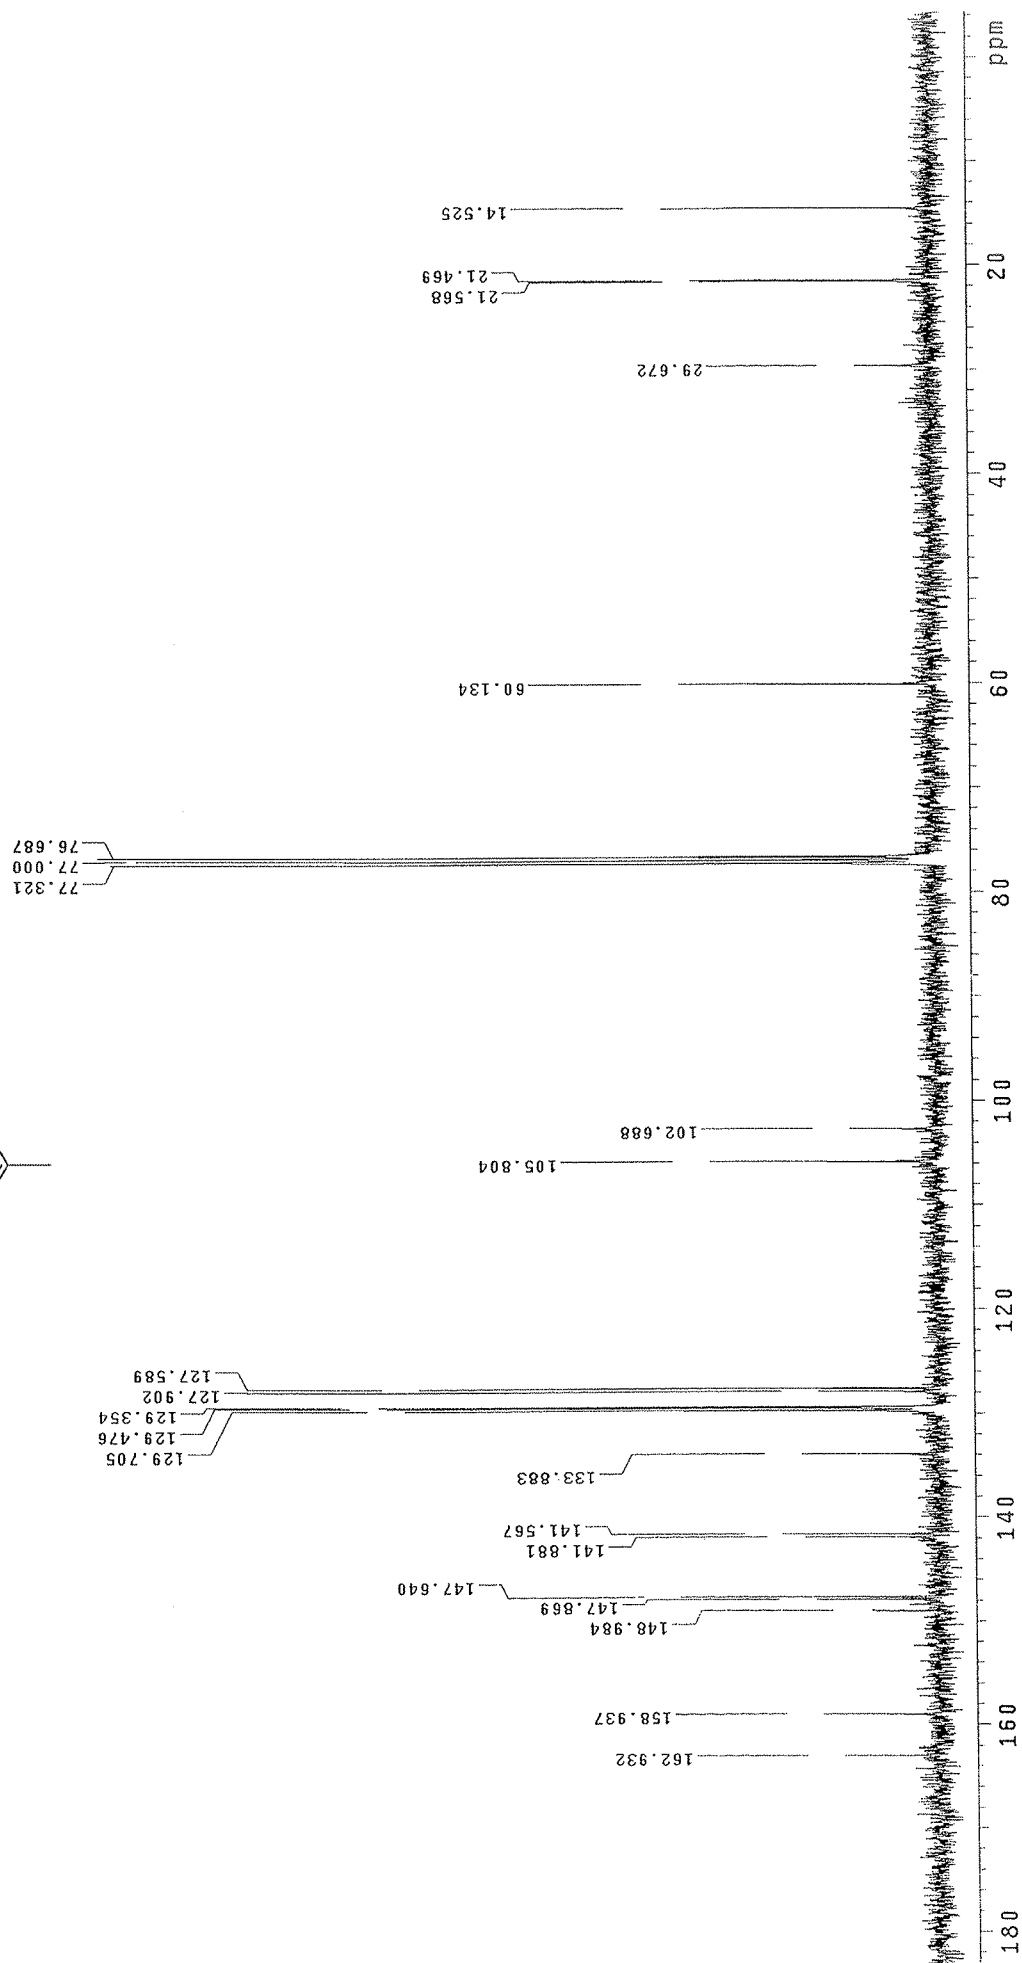

# Copies of $^{13}\text{C}$ NMR

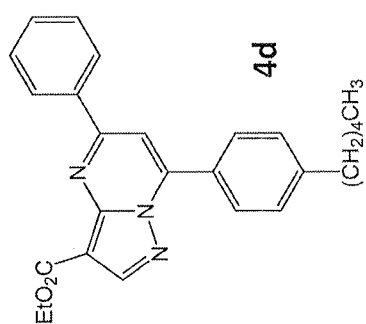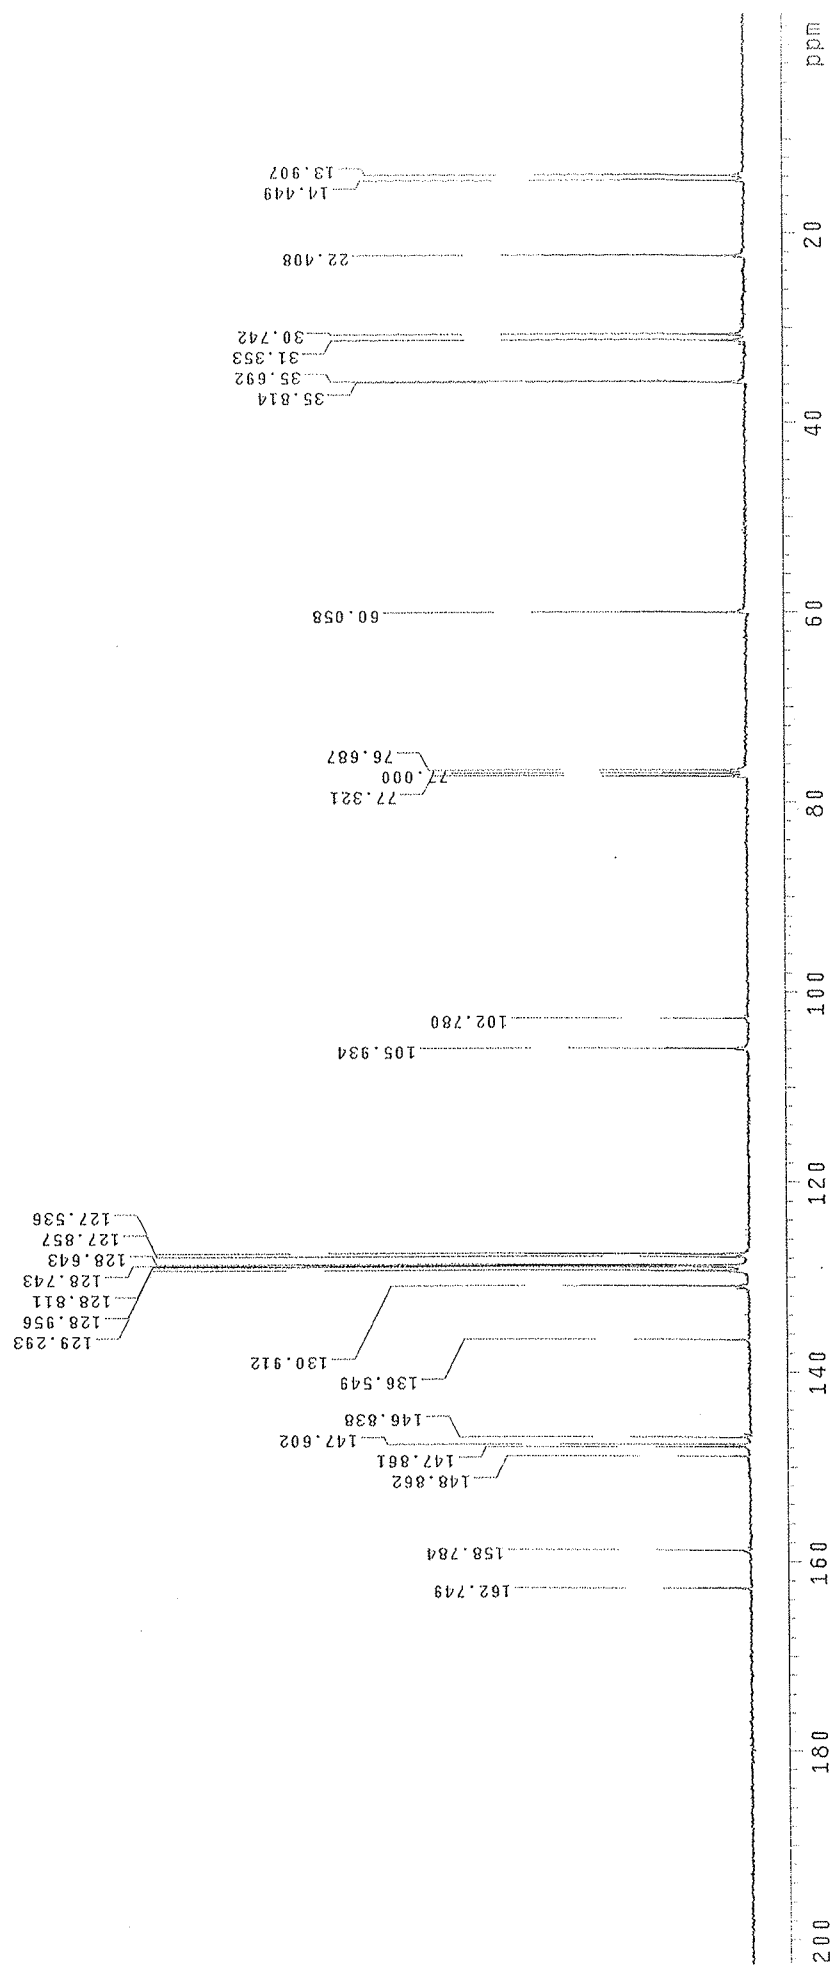

NMR-400 in CDCl<sub>3</sub>  
AR.No:ME0411/154  
Date: 1st April 2011

# Copies of <sup>13</sup>C NMR

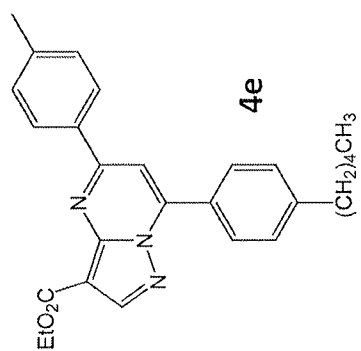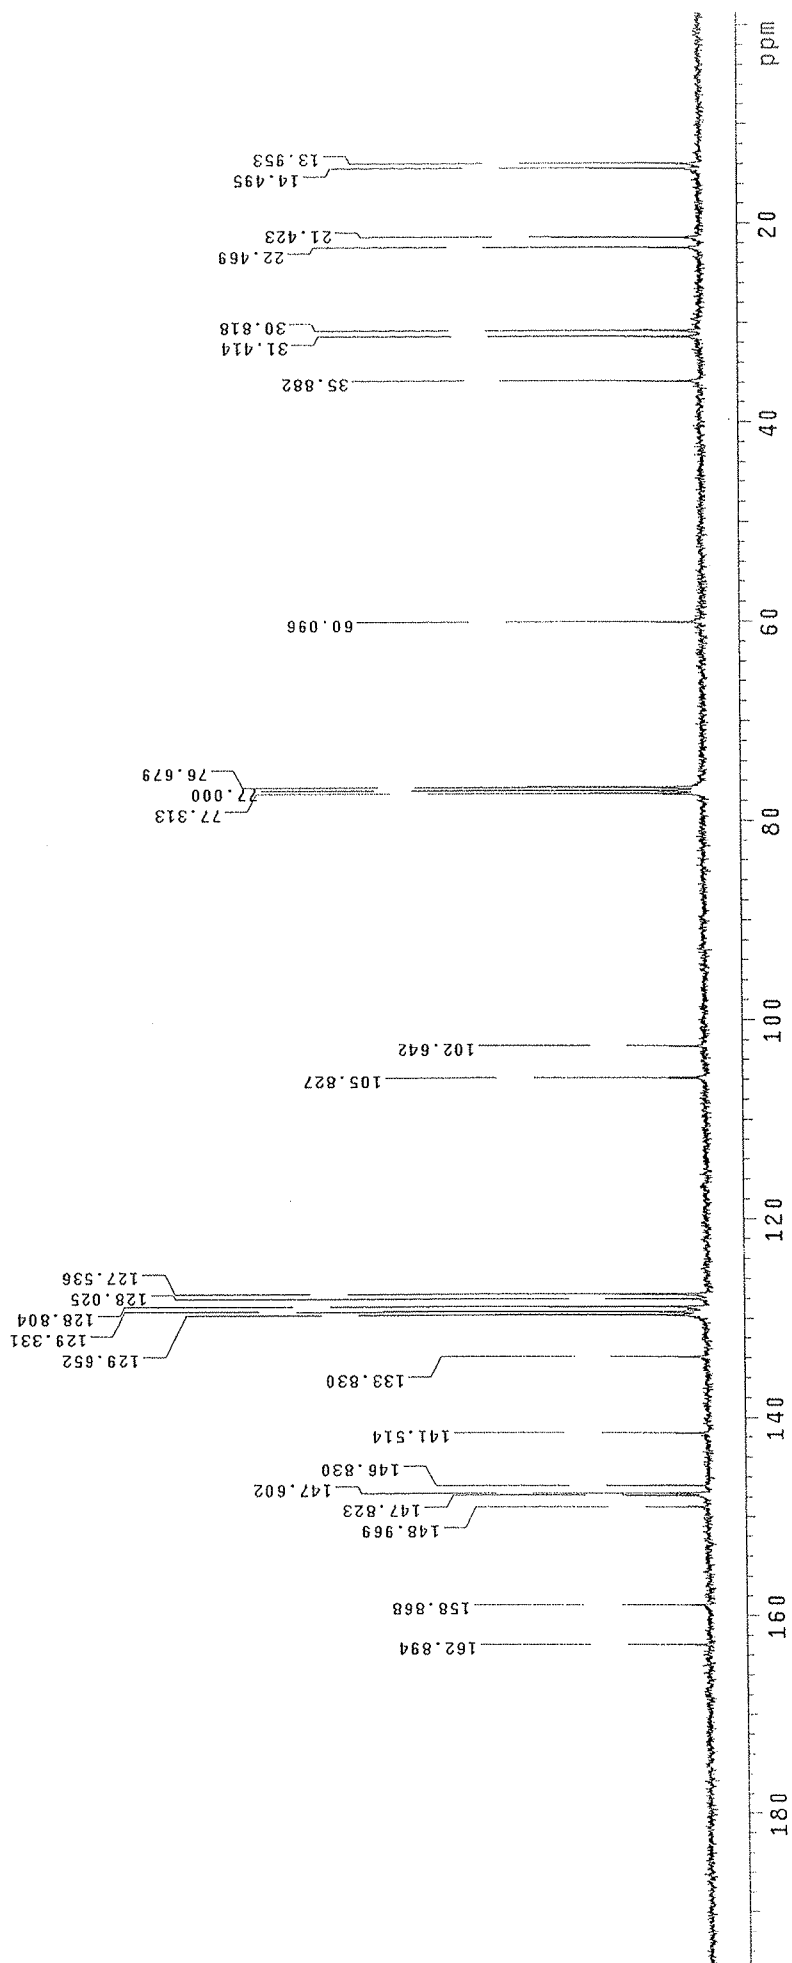

NMR-400 in CDCl<sub>3</sub>  
AR.No:ME0711/177  
Date:02nd July.2011

# Copies of $^{13}\text{C}$ NMR

NMR-400MHZ in CDCl<sub>3</sub>  
AR.No:NE0711/789  
Date:09th July.2011

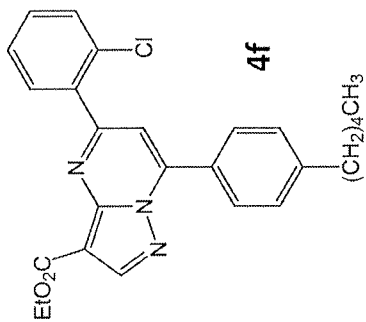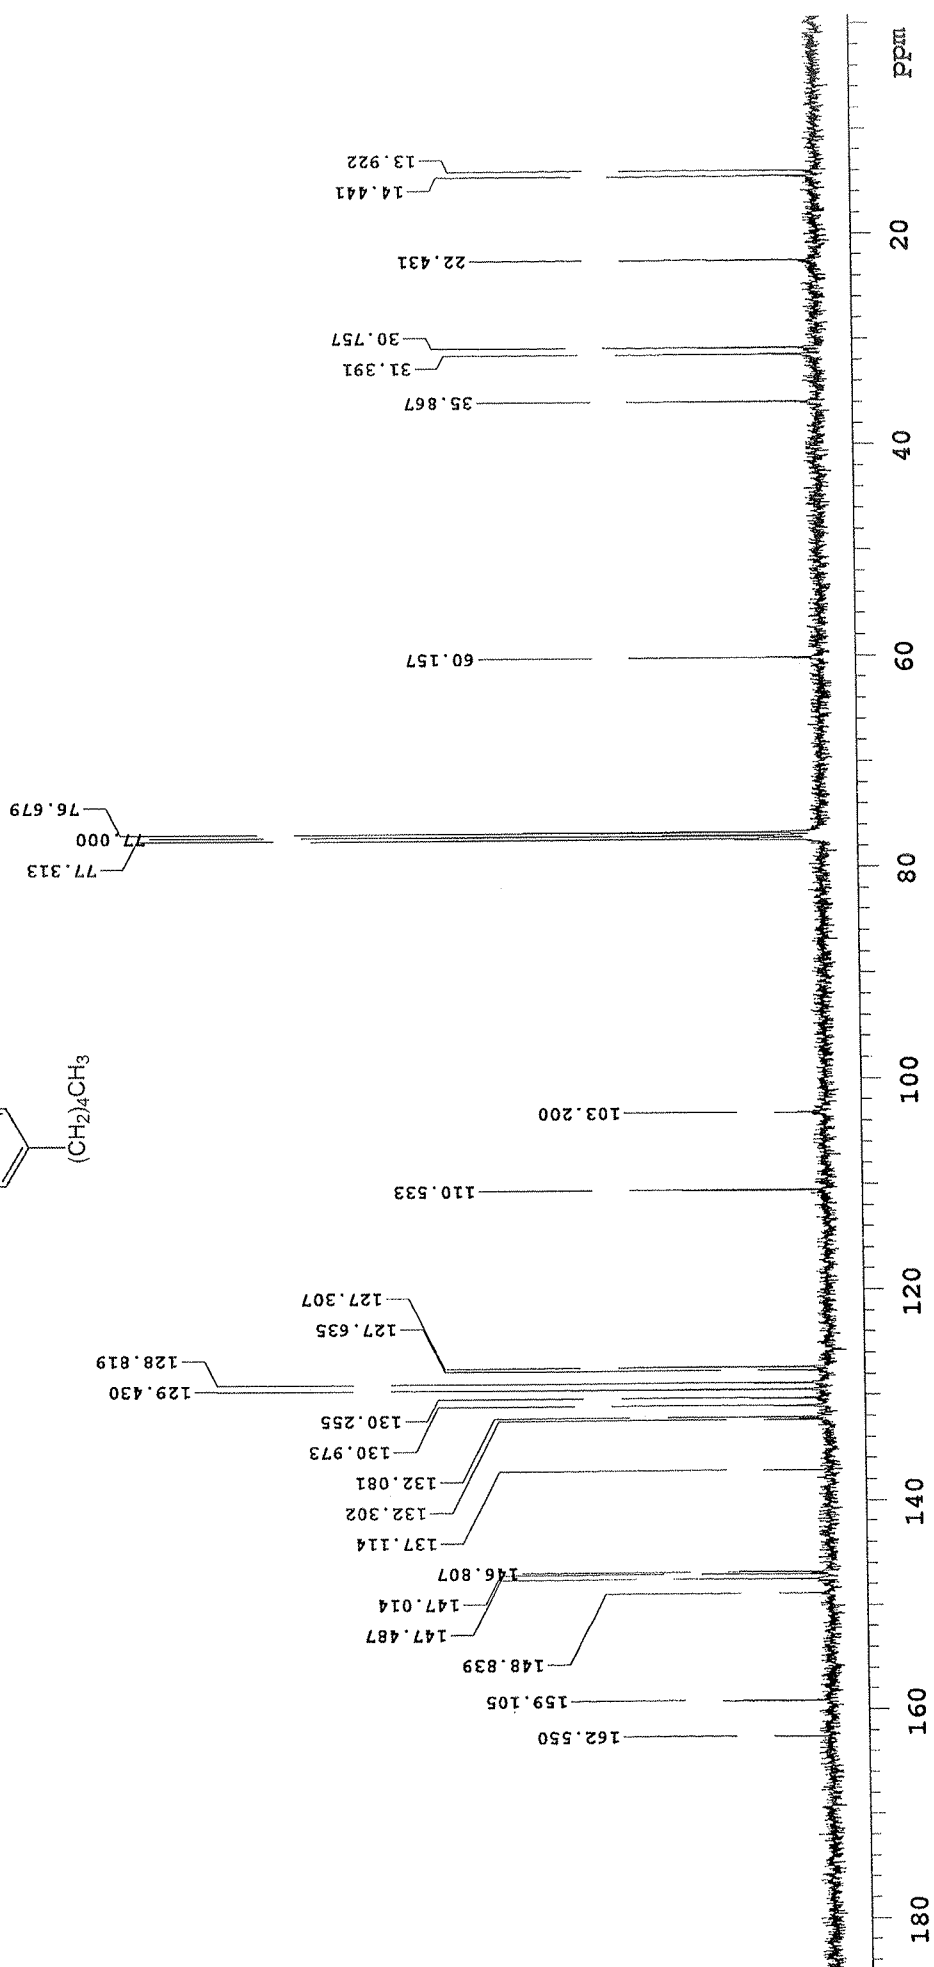

# Copies of <sup>13</sup>C NMR

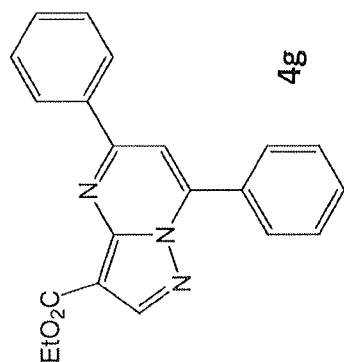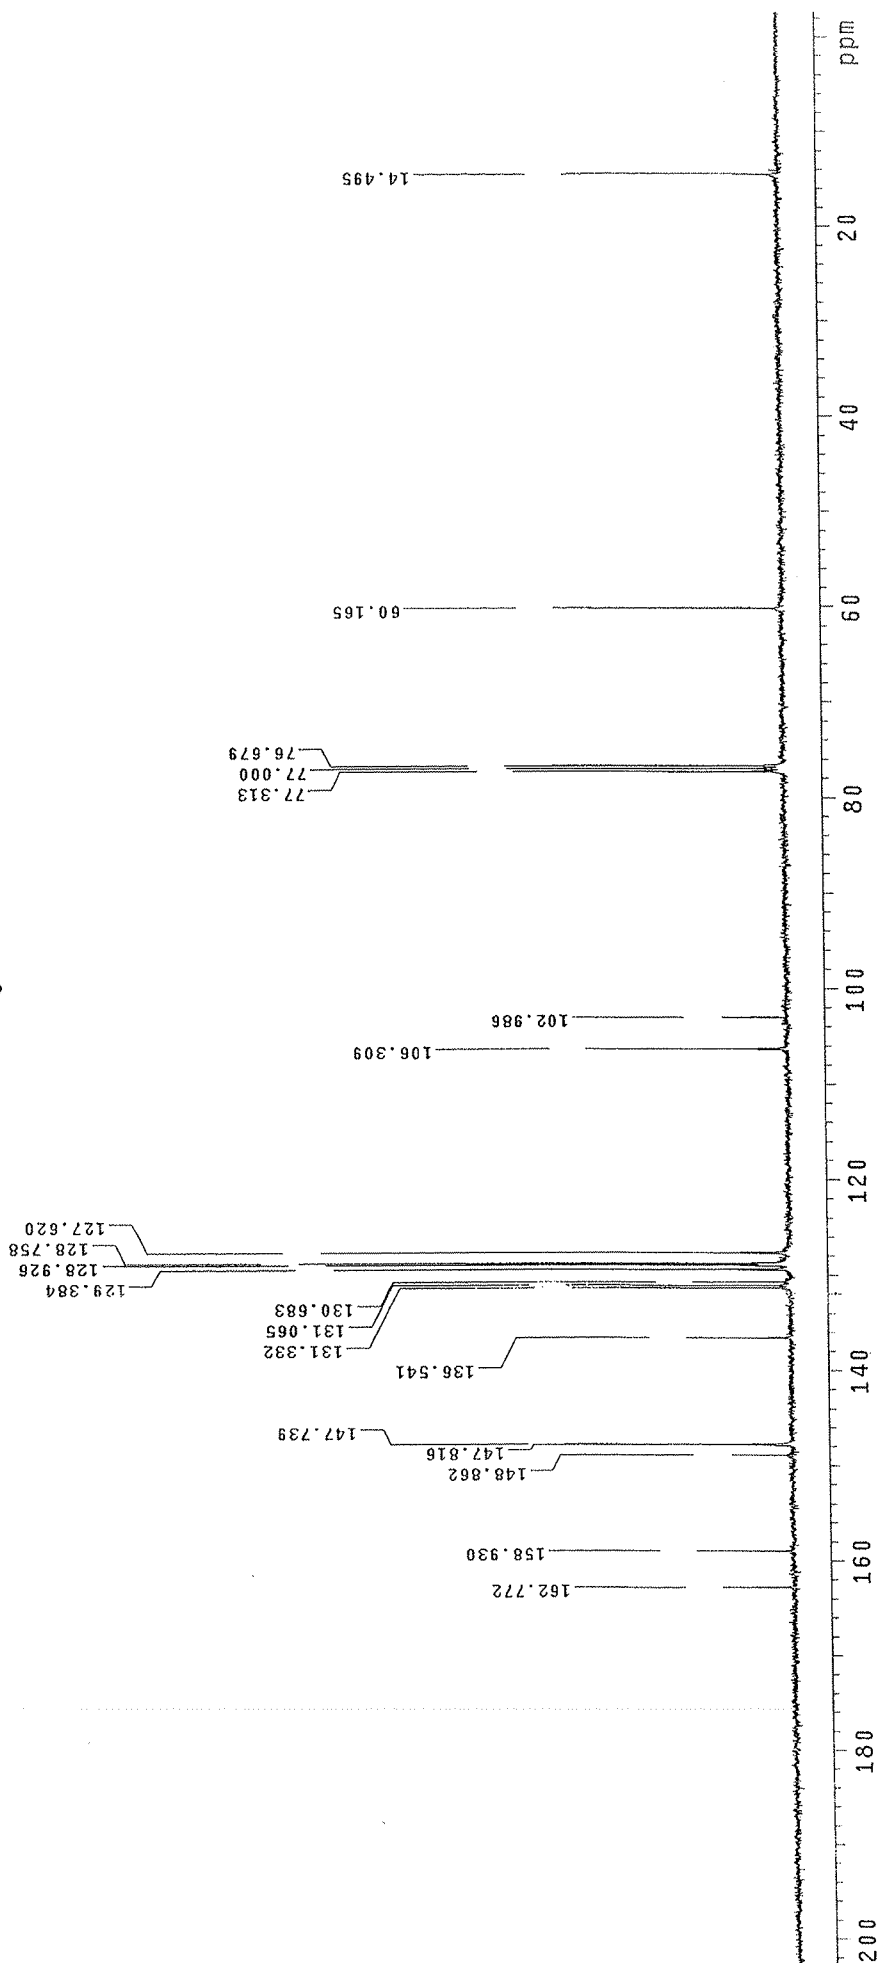

NMR-400 in CDCl<sub>3</sub>  
AR.NO:ME0311/2067  
Date: 19th March, 2011

# Copies of $^{13}\text{C}$ NMR

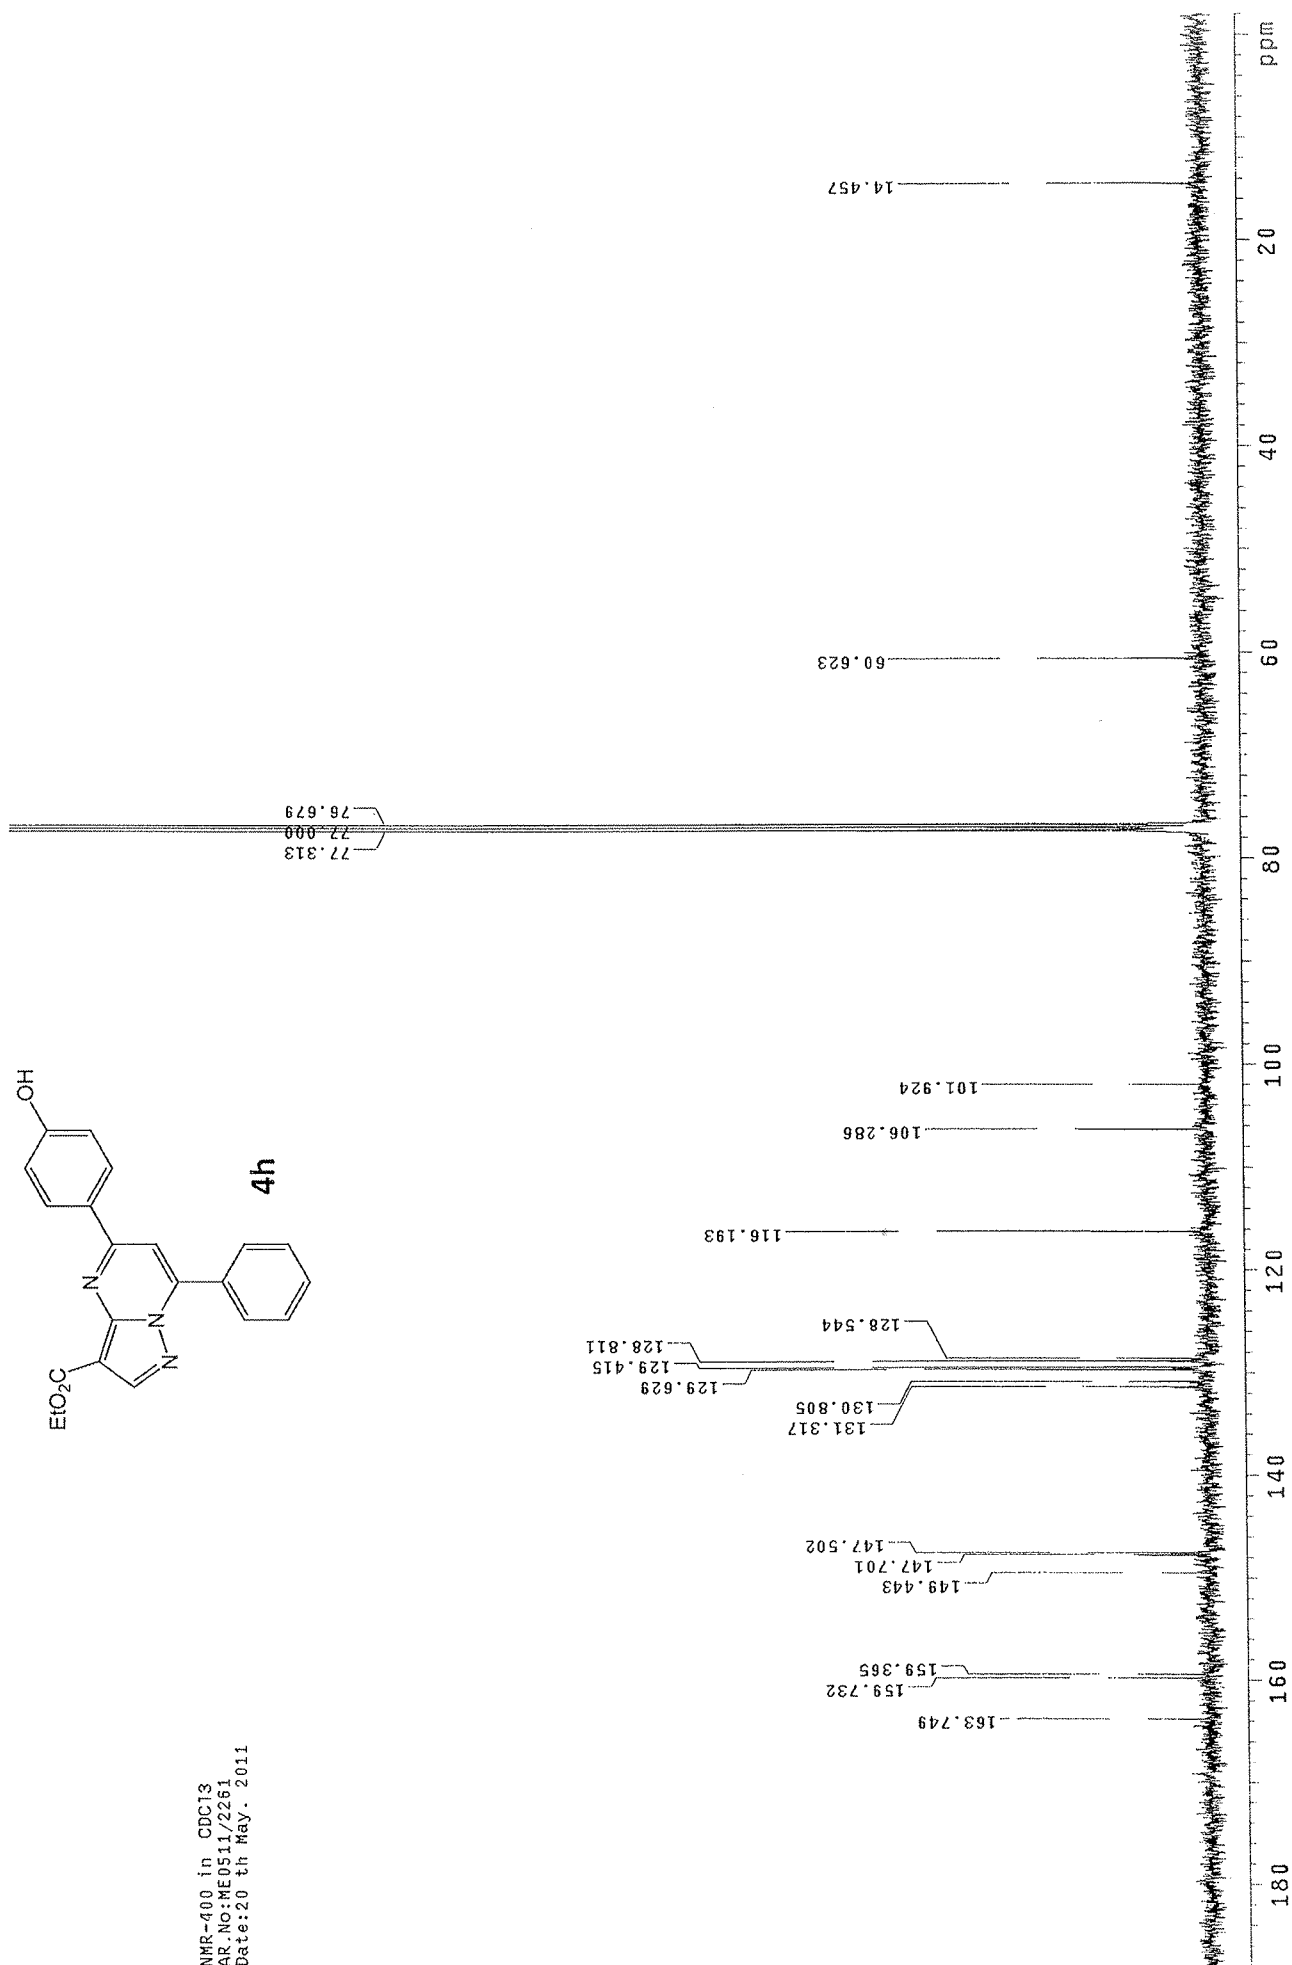

NMR-400 in CDCl<sub>3</sub>  
AR.No:ME0511/2261  
Date:20 th May. 2011



# Copies of $^{13}\text{C}$ NMR

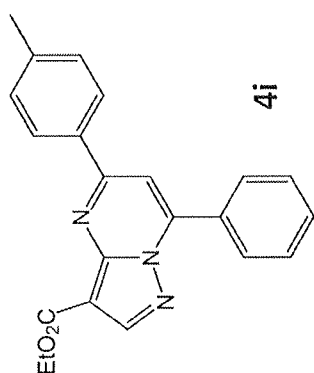

4i

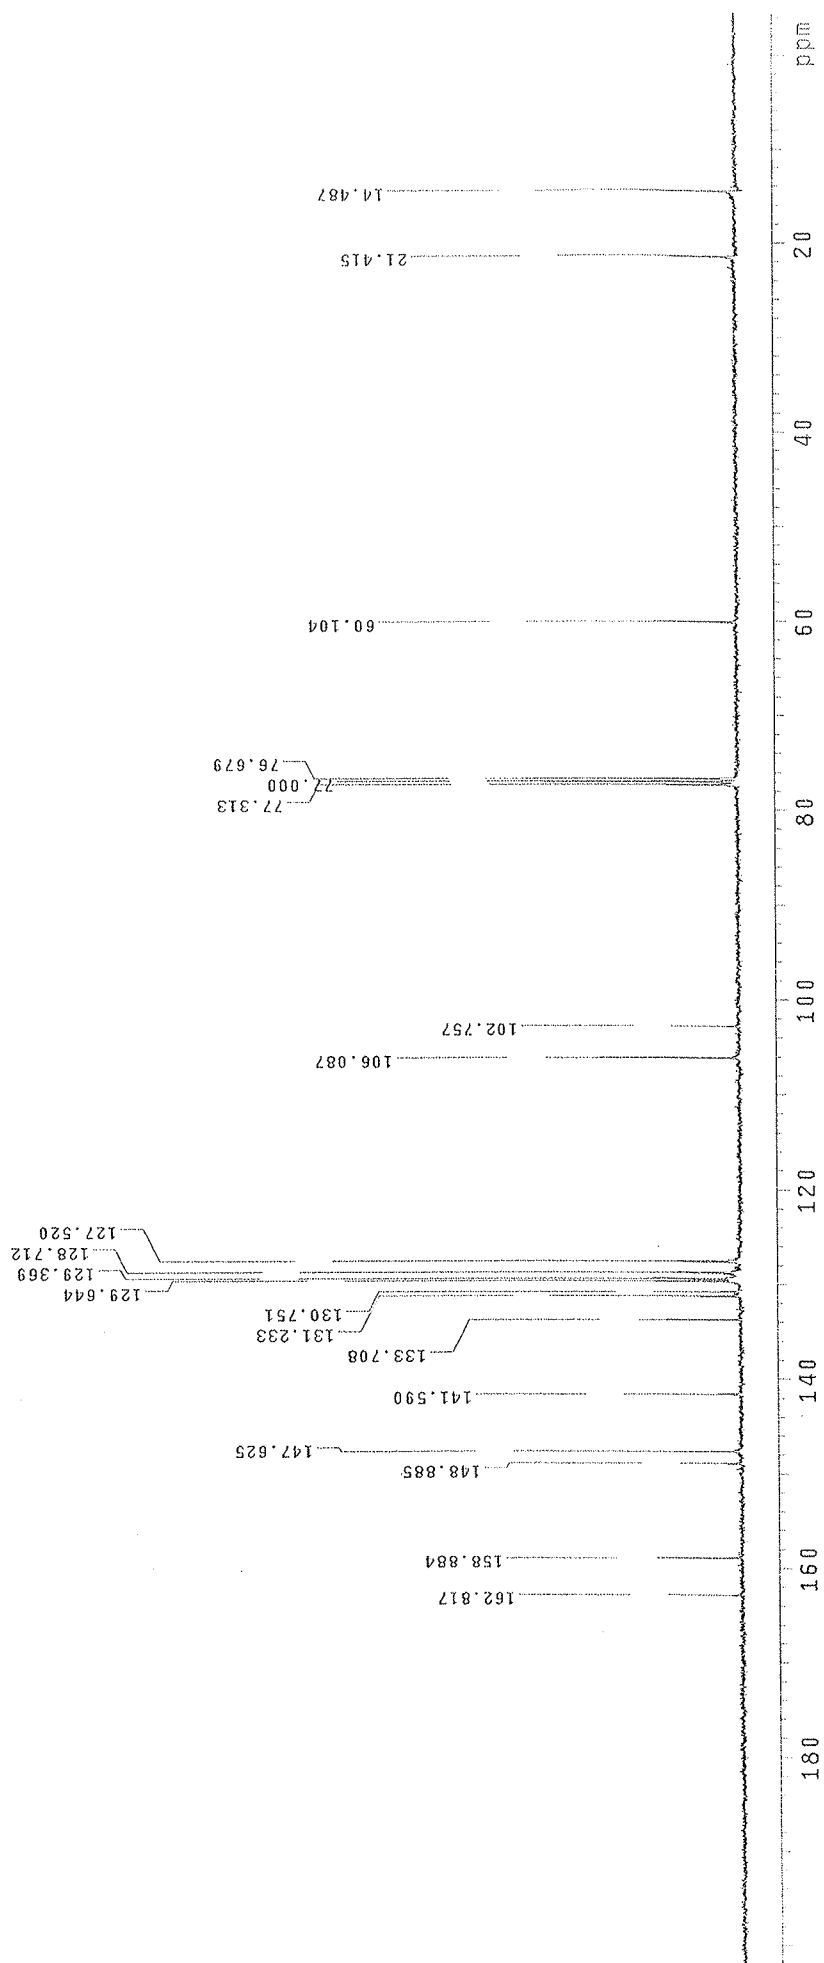

NMR-400 in CDCl<sub>3</sub>  
AR.No:ME0411/162  
Date: 1st April 2011

# Copies of <sup>13</sup>C NMR

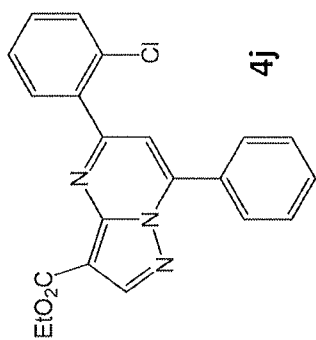

NMR-40J in CDCl<sub>3</sub>  
AR.No: NE0511/2262  
Date: 20 th May. 2011

77.313  
77.000  
76.679

4j

162.573  
159.220  
148.847  
147.609  
146.693  
137.084  
132.363  
132.157  
131.454  
131.088  
130.461  
130.331  
129.537  
128.804  
127.398

110.884  
103.421

60.257  
14.495

ppm  
160  
140  
120  
100  
80  
60  
40  
20

# Copies of <sup>13</sup>C NMR

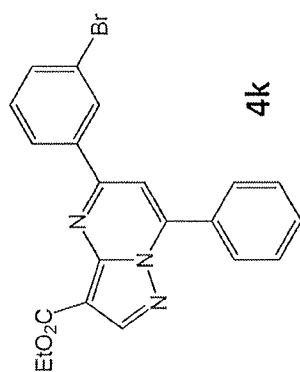

77.321  
77.000  
76.687

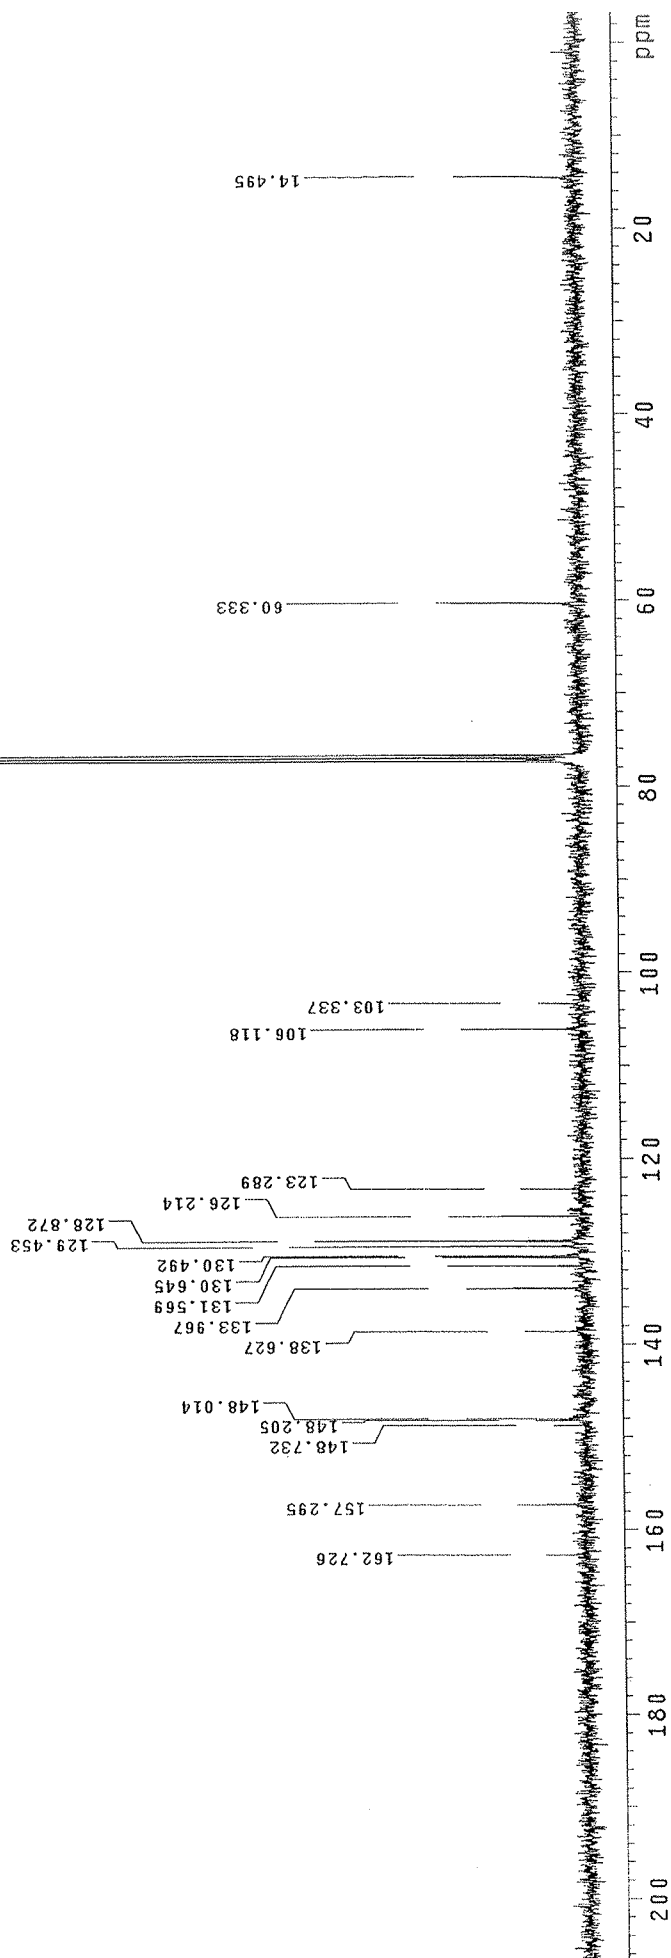

NMR-400 in CDCl<sub>3</sub>  
AR.No:ME0411/3042  
Date: 30 th April. 2011

# Copies of <sup>13</sup>C NMR

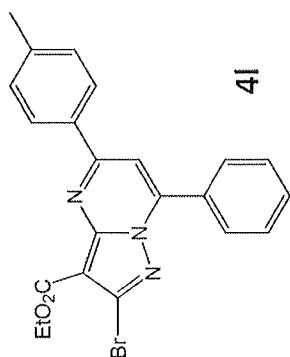

4I

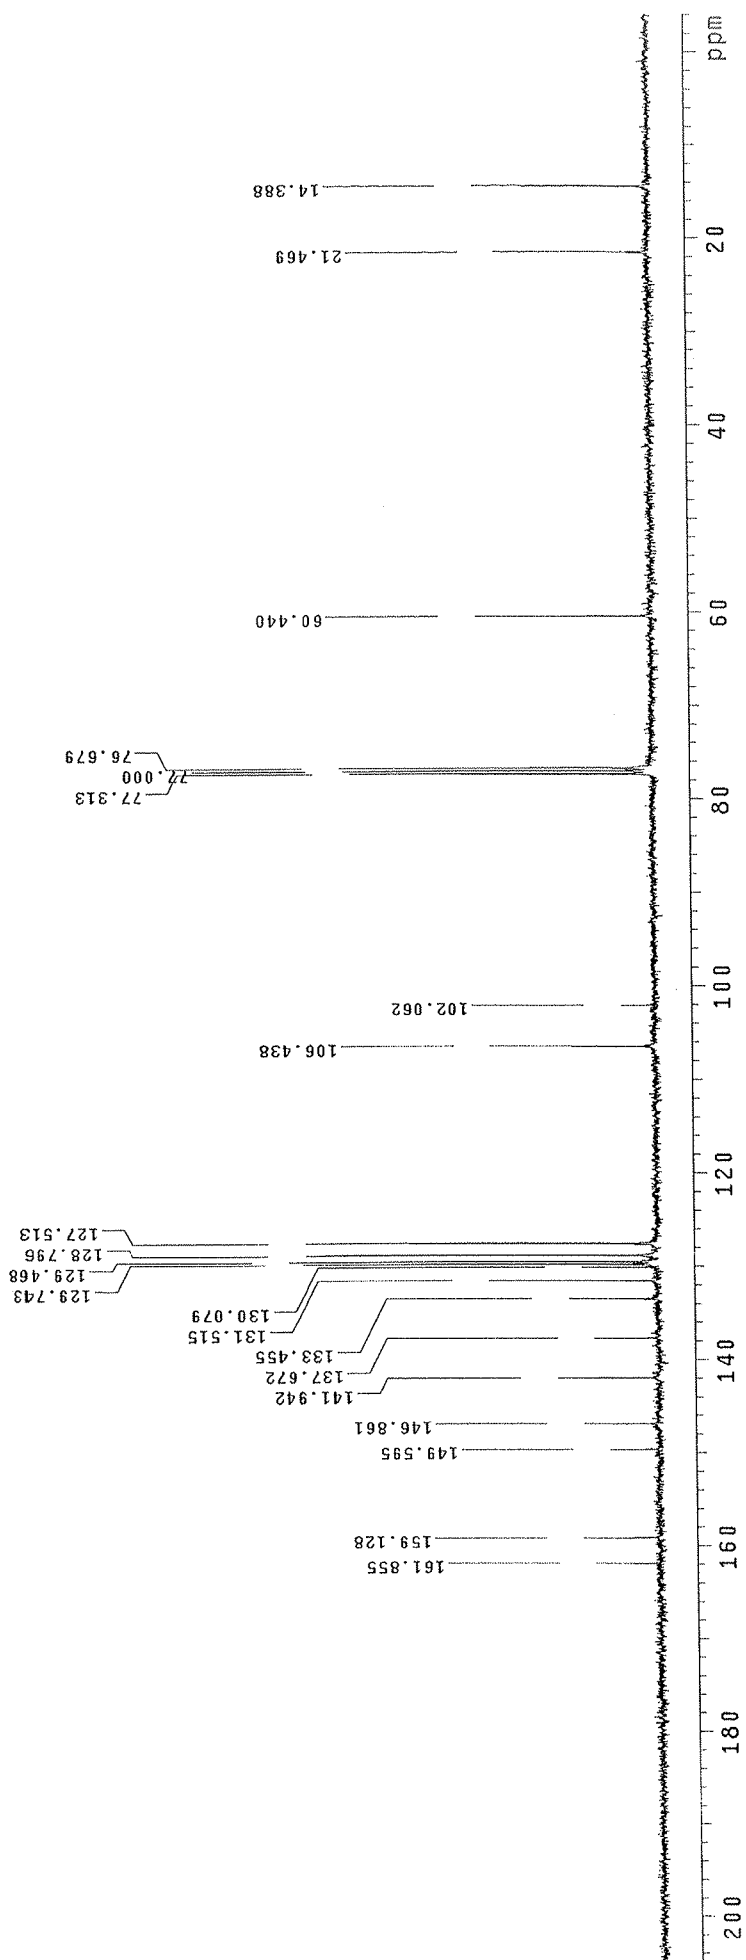

NMR-400 in CDCl<sub>3</sub>  
AR.No:ME0411/3043  
Date: 30 th April. 2011

# Copies of $^{13}\text{C}$ NMR

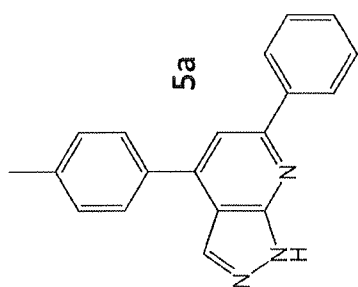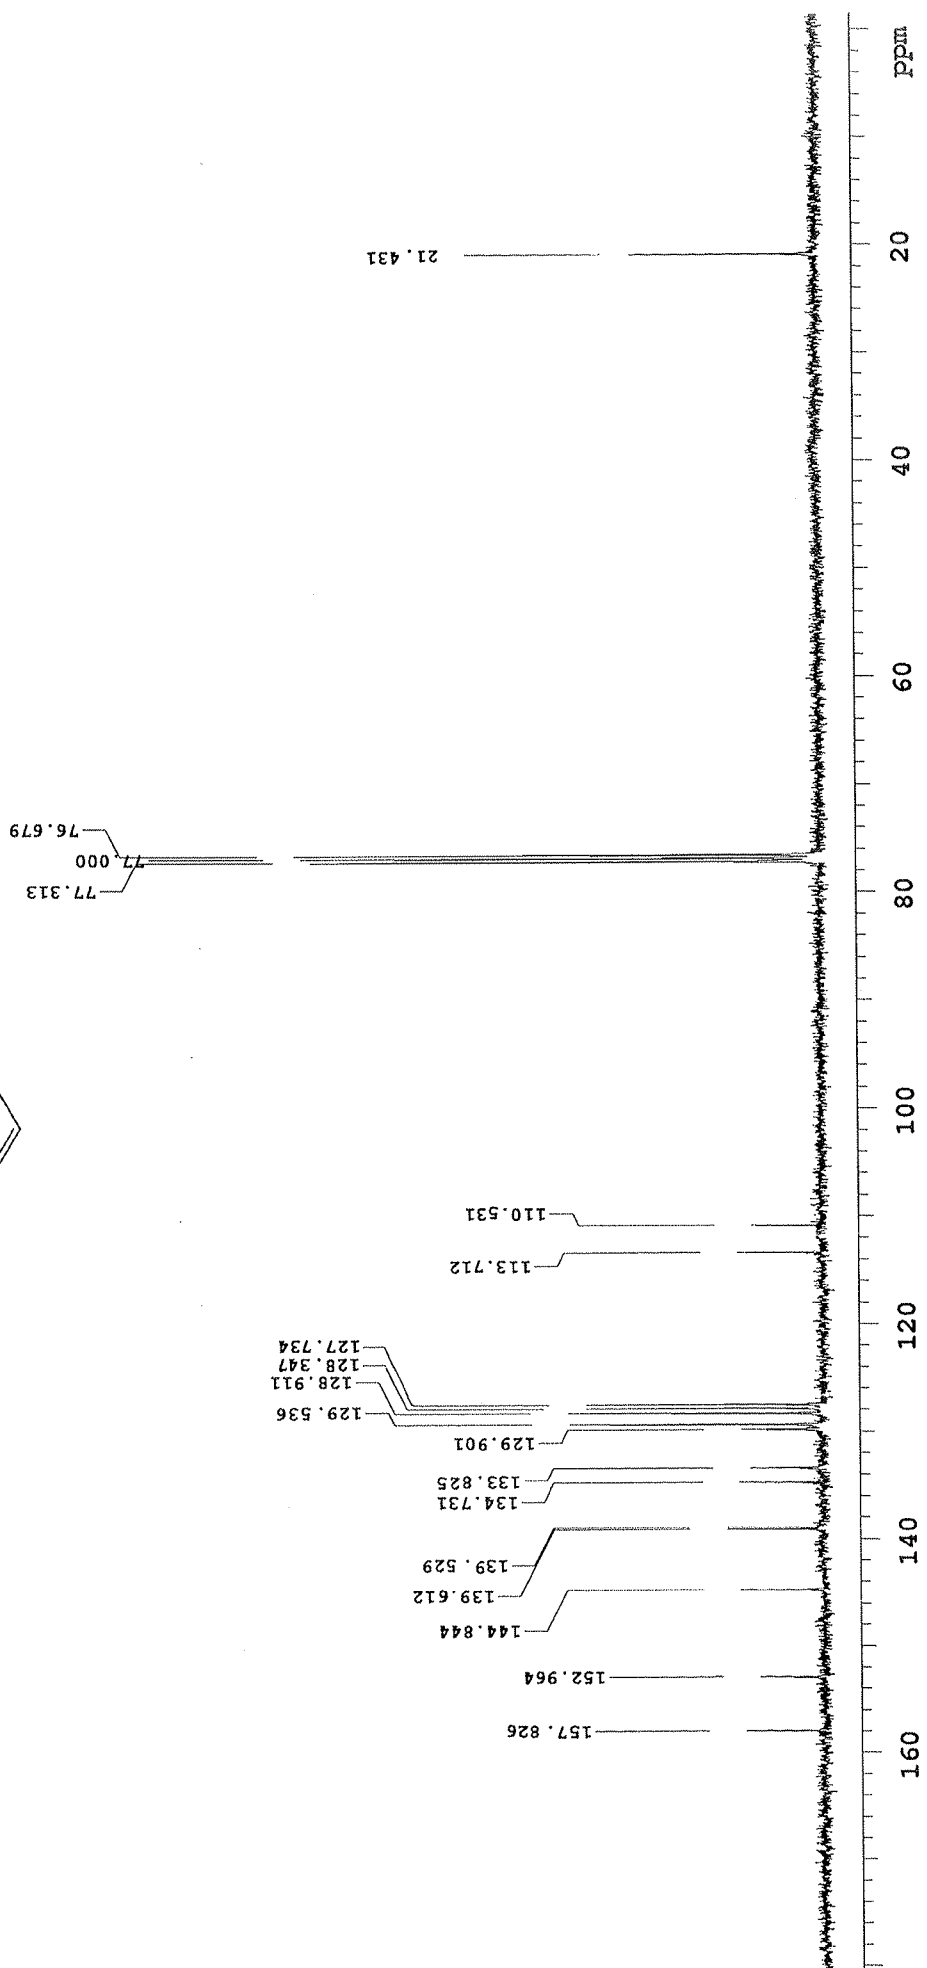

NMR-400 in CDCl<sub>3</sub>  
AR.No:ME0711/801  
Date:09th July.2011

# Copies of <sup>13</sup>C NMR

NMR-400MHZ in DMSO  
AR.No:ME0711/802  
Date:09th July.2011

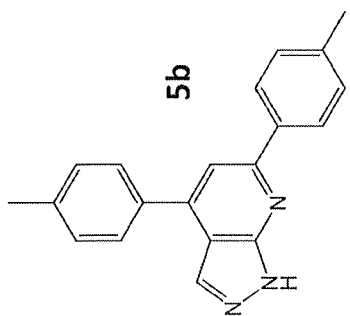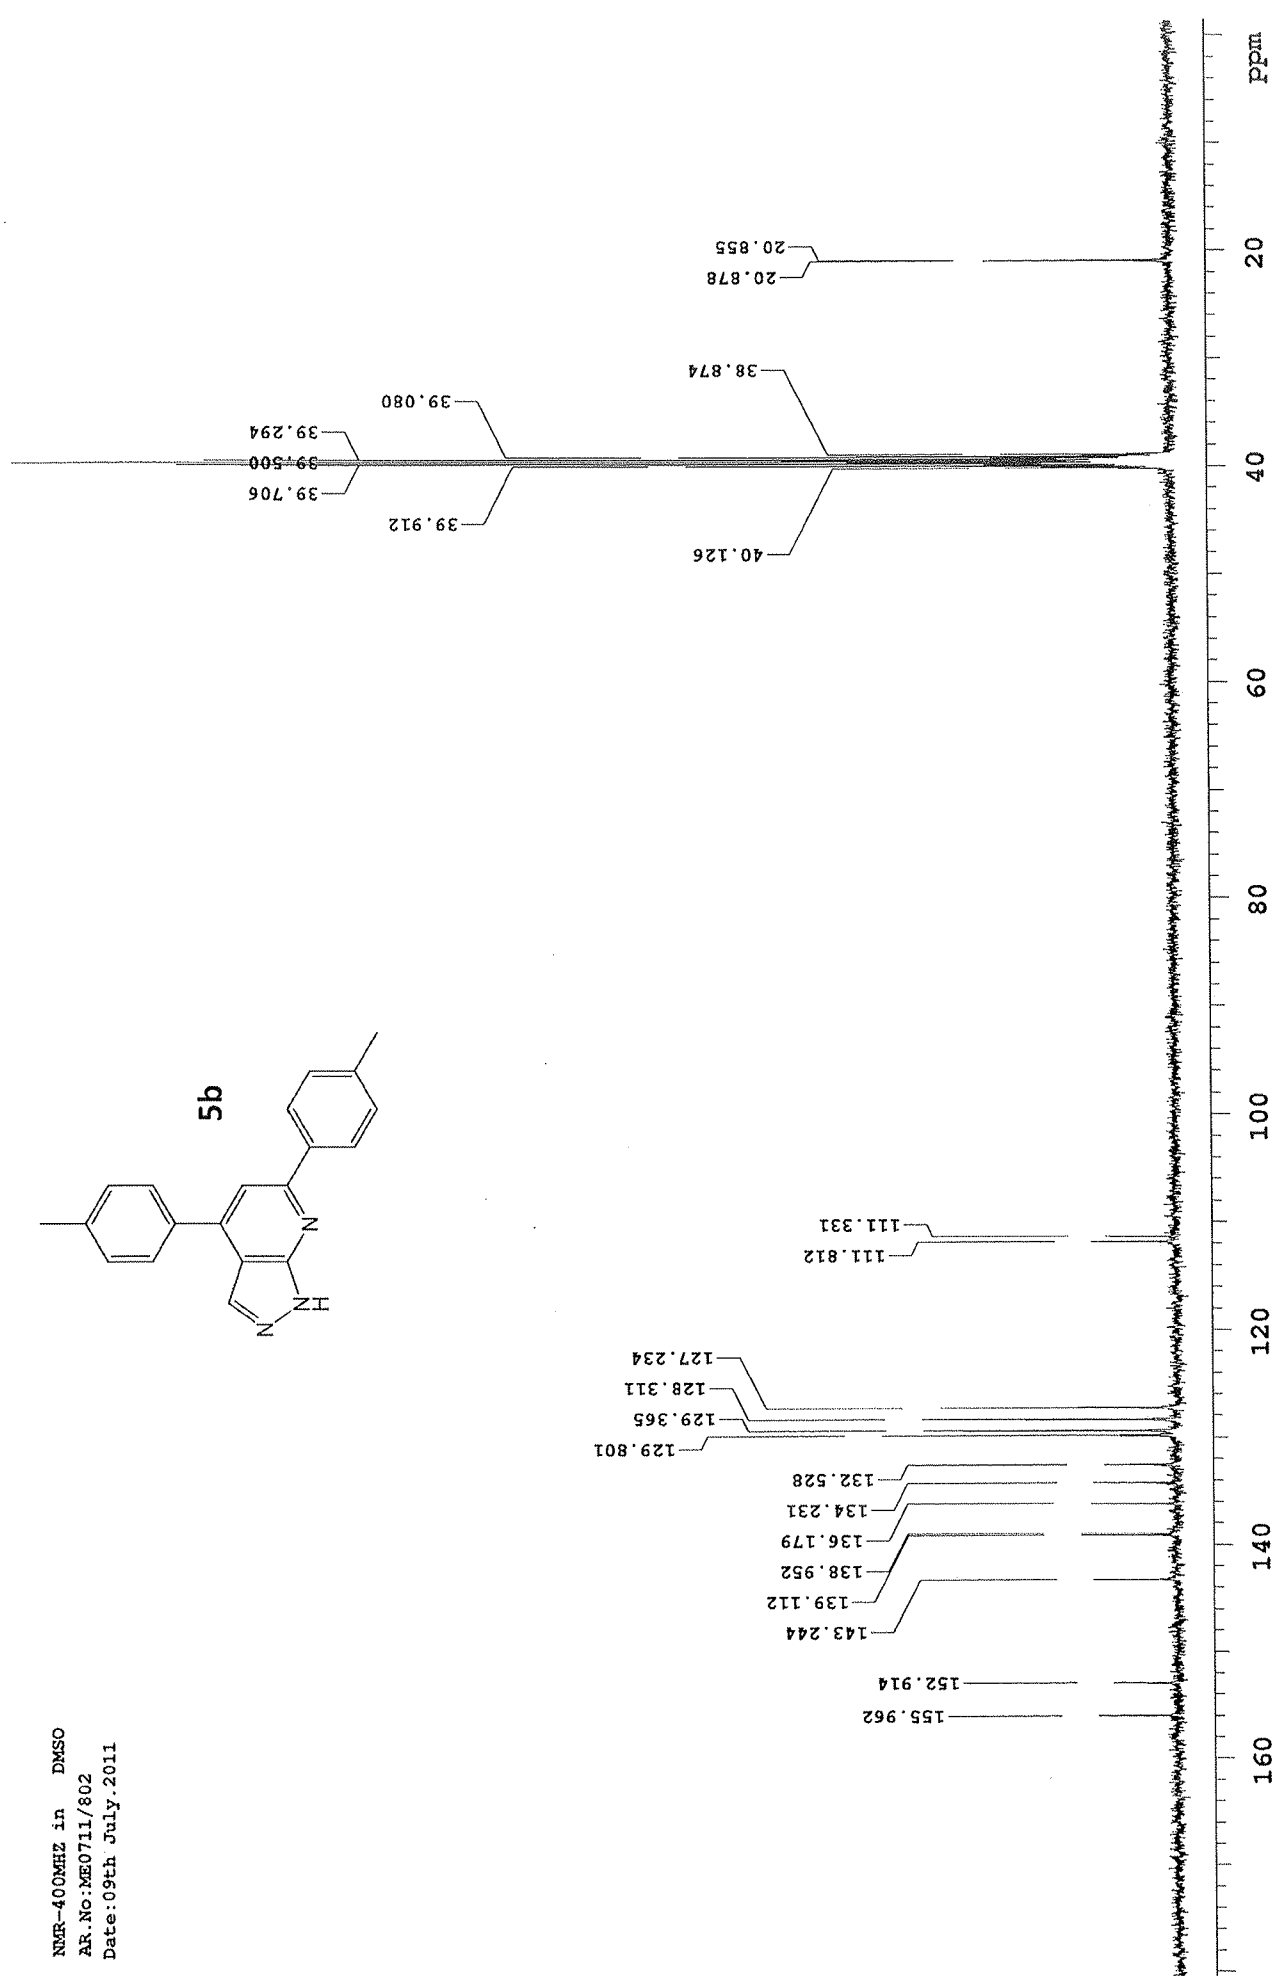

# Copies of $^{13}\text{C}$ NMR

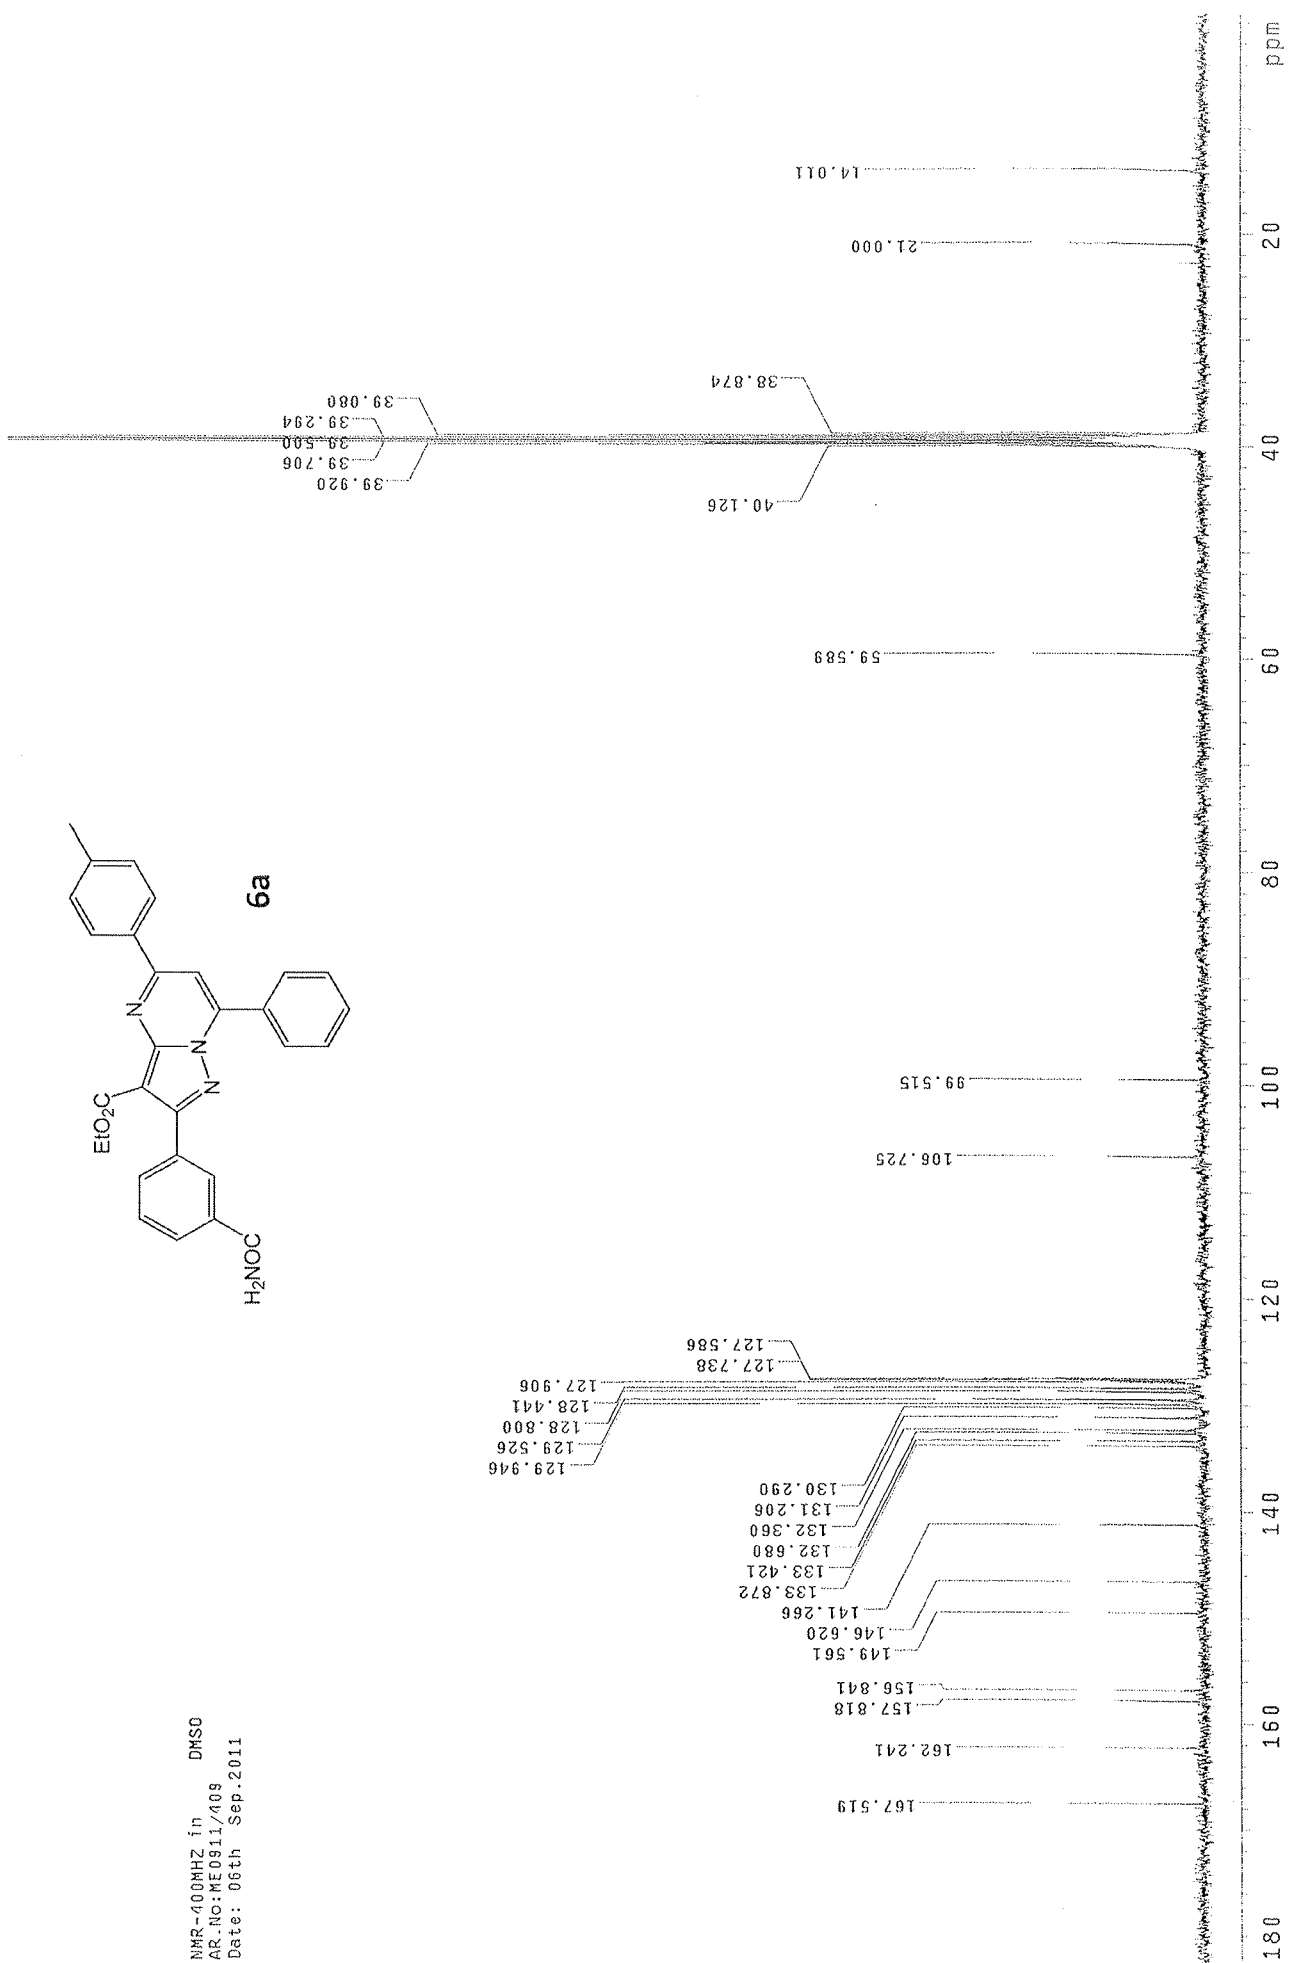

NMR-400MHZ in DMSO  
AR-NO:KE0911/109  
Date: 06th Sep.2011

# Copies of <sup>13</sup>C NMR

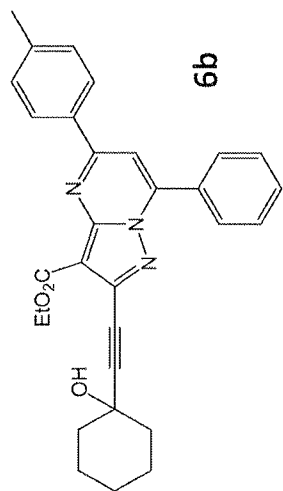



### Elemental Composition Report

#### Single Mass Analysis

Tolerance = 5.0 PPM / DBE: min = 0.0, max = 80.0  
 Element prediction: Off  
 Number of isotope peaks used for i-FIT = 3

Monoisotopic Mass, Even Electron Ions  
 147 formula(e) evaluated with 1 results within limits (up to 4 best isotopic matches for each mass)  
 Elements Used:  
 C: 0-35 H: 0-35 N: 0-6 O: 0-6  
 CPPS1

Aurigene Discovery Technologies, Hyderabad

UT0911\_20 24 (0.541) Cm (24:26-65:78x0.010)

1: TOF MS ES-  
 5.61e+00

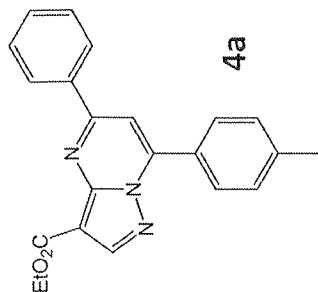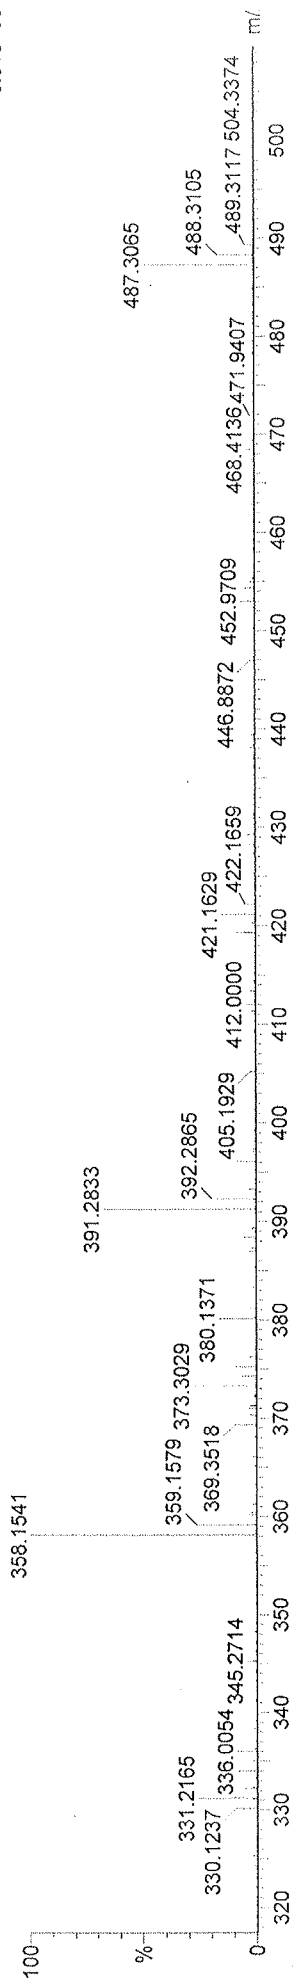

Minimum:  
 Maximum:

0.0  
 80.0

| Mass     | Calc. Mass | mDa  | PPM  | DBE  | i-FIT | Formula       |
|----------|------------|------|------|------|-------|---------------|
| 358.1541 | 358.1556   | -1.5 | -4.2 | 14.5 | 0.5   | C22 H20 N3 O2 |

358.1541 358.1556 -1.5 -4.2 14.5 0.5 C22 H20 N3 O2

## Elemental Composition Report

### Single Mass Analysis

Tolerance = 5.0 PPM / DBE: min = 0.0, max = 80.0

Element prediction: Off

Number of isotope peaks used for i-FIT = 3

Monoisotopic Mass, Even Electron Ions

300 formula(e) evaluated with 1 results within limits (up to 4 best isotopic matches for each mass)

Elements Used:

C: 0-35 H: 0-35 N: 0-6 O: 0-6 Br: 0-1

CPPS2

Aurigene Discovery Technologies, Hyderabad

UT0911\_19 25 (0.579) Cm (25:28-66:76x0.010)

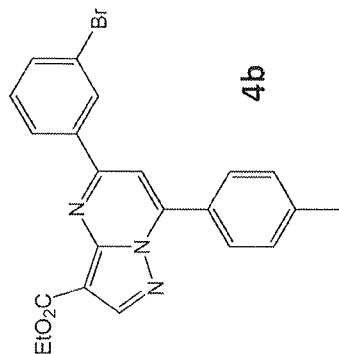

1: TOF MS ES-  
9.69e+0C

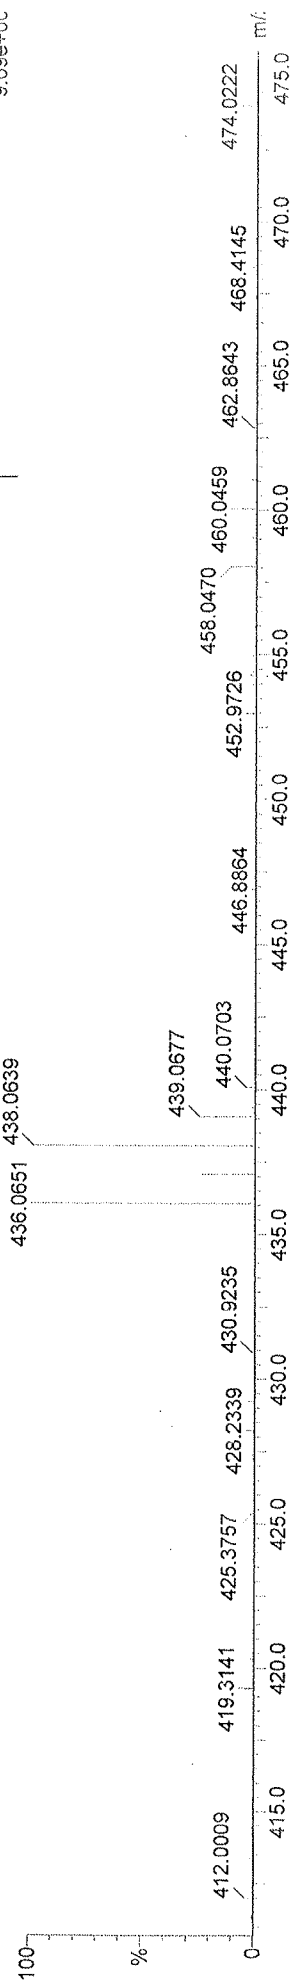

Minimum: 0.0  
 Maximum: 80.0

| Mass     | Calc. Mass | mDa  | PPM  | DBE  | i-FIT | Formula          |
|----------|------------|------|------|------|-------|------------------|
| 436.0651 | 436.0661   | -1.0 | -2.3 | 14.5 | 2.8   | C22 H19 N3 O2 Br |

### Elemental Composition Report

#### Single Mass Analysis

Tolerance = 5.0 PPM / DBE: min = 0.0, max = 80.0  
 Element prediction: Off  
 Number of isotope peaks used for i-FIT = 3

Monoisotopic Mass, Even Electron Ions  
 147 formula(e) evaluated with 1 results within limits (up to 4 best isotopic matches for each mass)  
 Elements Used:  
 C: 0-35 H: 0-35 N: 0-6 O: 0-6  
 CPPS3

Aurigene Discovery Technologies, Hyderabad

UT0911\_18 26 (0.598) Cm (26:29-75:82x0.010)

1: TOF MS ES+  
 1.24e+00

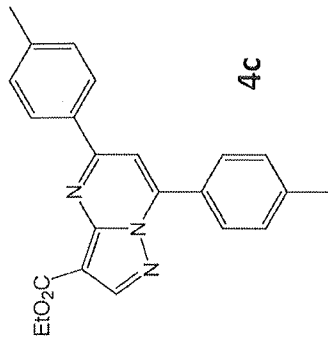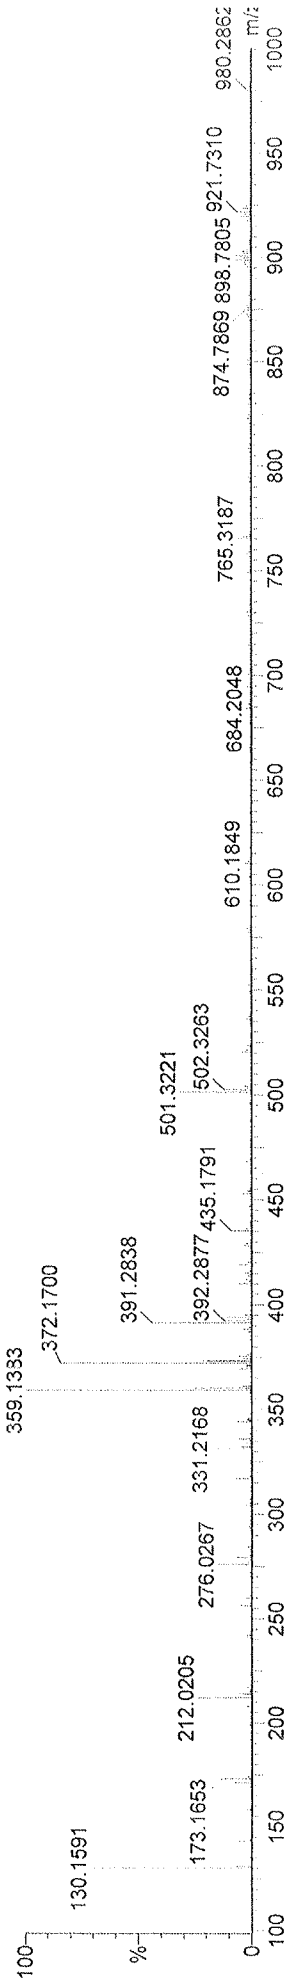

| Mass     | Calc. Mass | mDa  | PPM  | DBE  | i-FIT | Formula       |
|----------|------------|------|------|------|-------|---------------|
| 372.1700 | 372.1712   | -1.2 | -3.2 | 14.5 | 4.5   | C23 H22 N3 O2 |
|          |            |      |      | 0.0  |       |               |
|          |            |      |      | 80.0 |       |               |

## Elemental Composition Report

### Single Mass Analysis

Tolerance = 5.0 PPM / DBE: min = 0.0, max = 80.0  
 Element prediction: Off  
 Number of isotope peaks used for i-FIT = 3

Monoisotopic Mass, Even Electron Ions  
 147 formula(e) evaluated with 1 results within limits (up to 4 best isotopic matches for each mass)  
 Elements Used:  
 C: 0-35 H: 0-35 N: 0-6 O: 0-6  
 CPPS4

Aurigene Discovery Technologies, Hyderabad

UT0911\_17 25 (0.581) Cm (25:27-72:75x0.010)

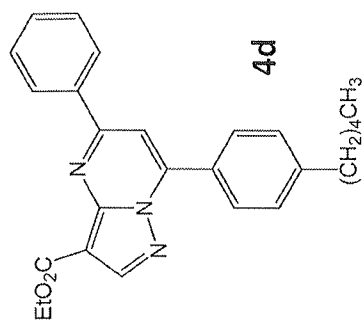

1: TOF MS ES+  
 1.56e+00

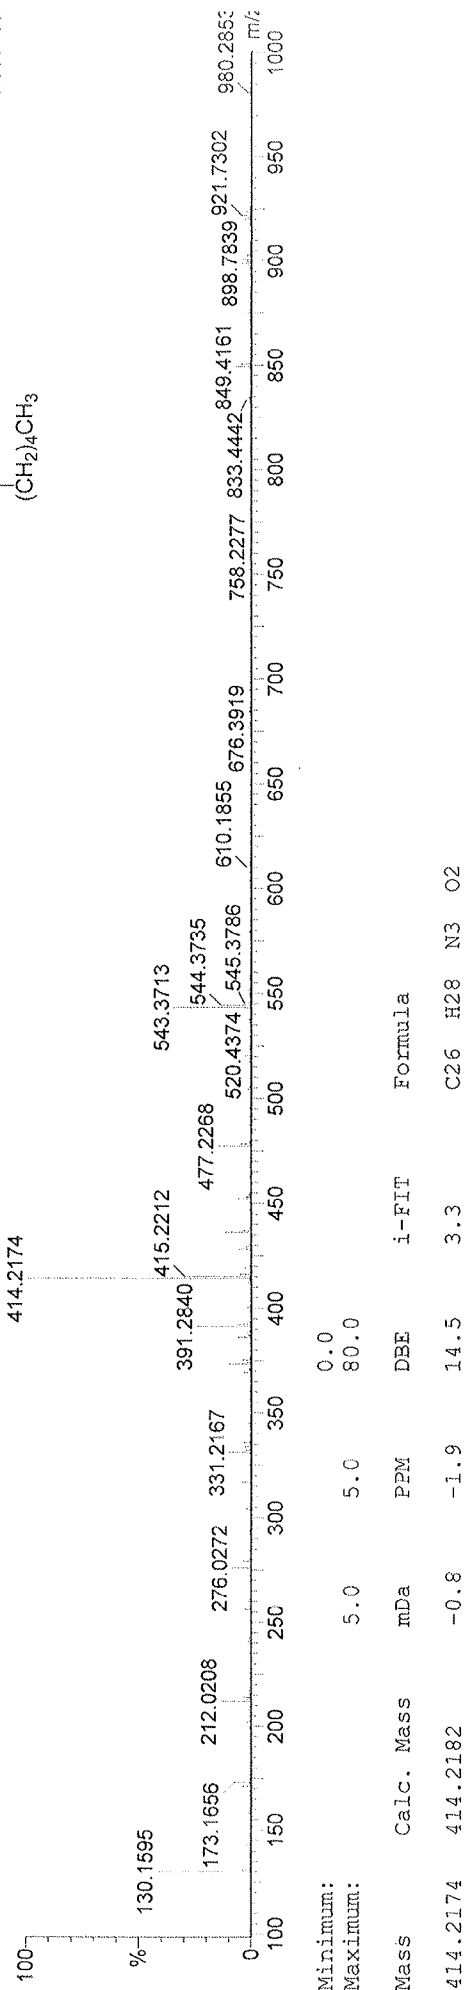

Minimum:

Maximum:

| Mass     | Calc. Mass | mDa  | PPM  | DBE  | i-FIT | Formula       |
|----------|------------|------|------|------|-------|---------------|
| 414.2174 | 414.2182   | -0.8 | -1.9 | 14.5 | 3.3   | C26 H28 N3 O2 |



### Elemental Composition Report

#### Single Mass Analysis

Tolerance = 5.0 PPM / DBE: min = 0.0, max = 80.0  
 Element prediction: Off  
 Number of isotope peaks used for i-FIT = 3

Monoisotopic Mass, Even Electron Ions  
 193 formula(e) evaluated with 1 results within limits (up to 4 best isotopic matches for each mass)  
 Elements Used:

C: 0-30 H: 0-35 N: 0-4 O: 0-3 Cl: 0-3

CPFS-6

Aurigene Discovery Technologies, Hyderabad

UT0911\_11 24 (0.541) Cm (24:28-74:82x0.010)

1. TOF MS ES-  
 2.53e+00

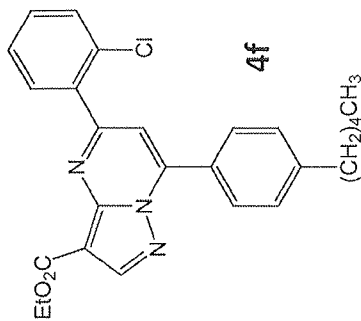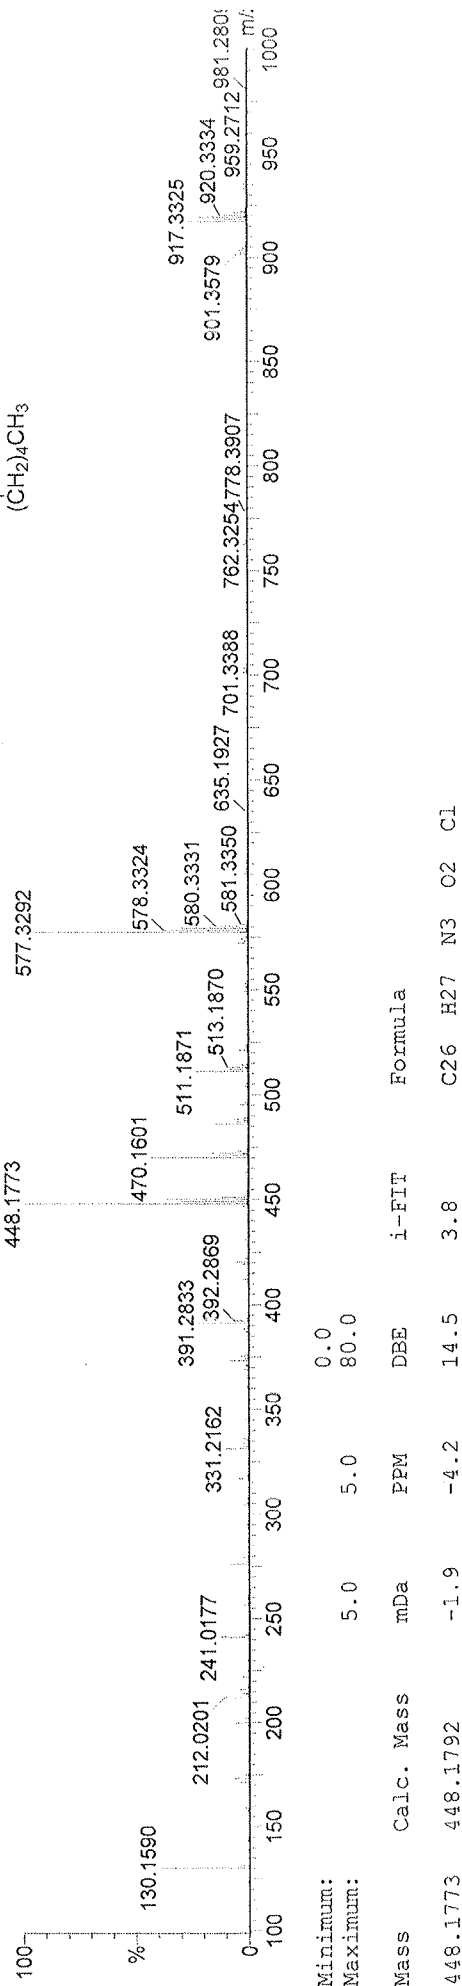

Minimum:  
 Maximum:

| Mass     | Calc. Mass | PPM  | DBE  | i-FIT | Formula          |
|----------|------------|------|------|-------|------------------|
| 448.1773 | 448.1792   | -1.9 | 14.5 | 3.8   | C26 H27 N3 O2 Cl |

### Elemental Composition Report

#### Single Mass Analysis

Tolerance = 5.0 PPM / DBE: min = 0.0, max = 80.0  
 Element prediction: Off  
 Number of isotope peaks used for i-FIT = 3

Monoisotopic Mass, Even Electron Ions  
 38 formula(e) evaluated with 1 results within limits (up to 4 best isotopic matches for each mass)  
 Elements Used:

C: 0-24 H: 0-25 N: 0-5 O: 0-3  
 CPPS-7

UT0911\_10 21 (0.488) Cm (21:24-68:72x0.010)

Aurigene Discovery Technologies, Hyderabad

1: TOF MS ES+  
 1.56e+00

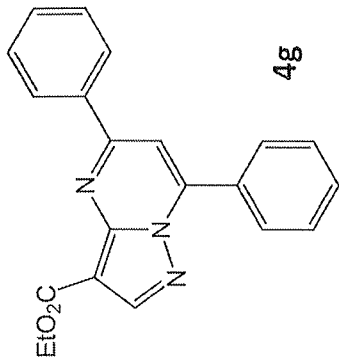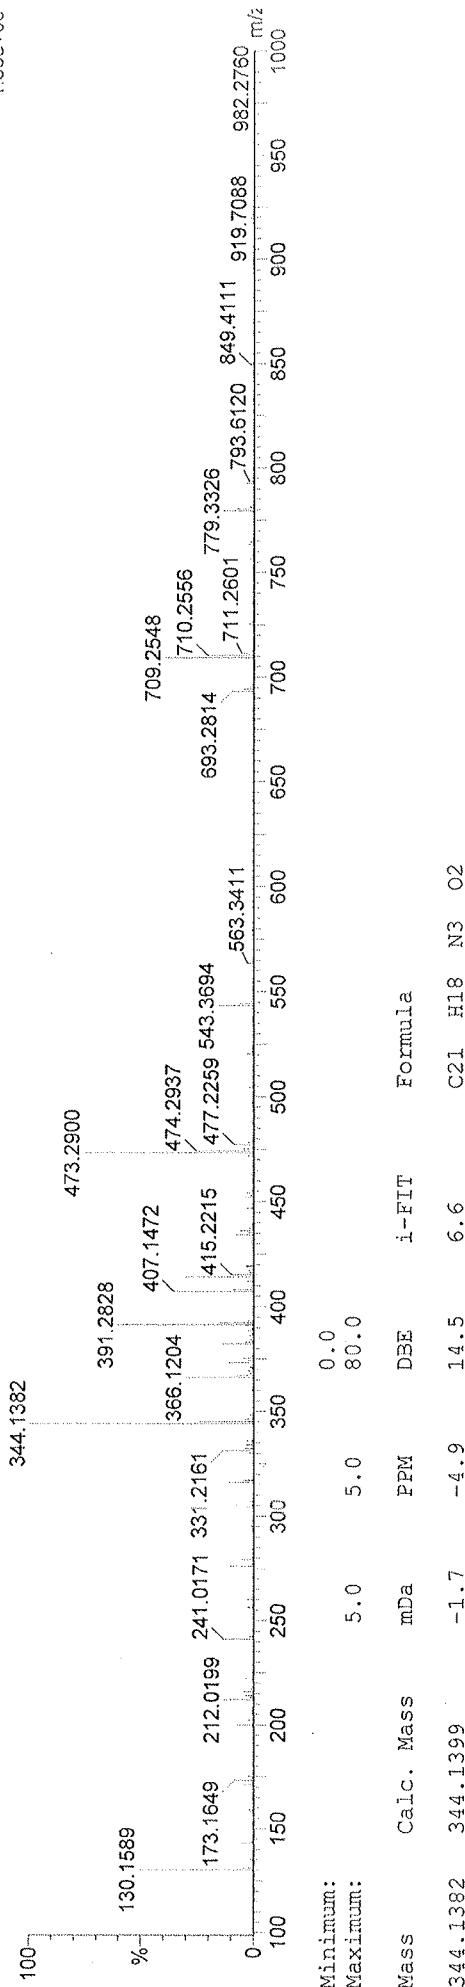

Minimum: 0.0  
 Maximum: 80.0

| Mass     | Calc. Mass | mDa  | PPM  | DBE  | i-FIT | Formula       |
|----------|------------|------|------|------|-------|---------------|
| 344.1382 | 344.1399   | -1.7 | -4.9 | 14.5 | 6.6   | C21 H18 N3 O2 |

### Elemental Composition Report

#### Single Mass Analysis

Tolerance = 5.0 PPM / DBE: min = 0.0, max = 80.0

Element prediction: Off

Number of isotope peaks used for i-FIT = 3

Monoisotopic Mass, Even Electron Ions

29 formula(e) evaluated with 1 results within limits (up to 4 best isotopic matches for each mass)

Elements Used:

C: 0-24 H: 0-25 N: 0-5 O: 0-3

CPPS-8

Aurigene Discovery Technologies, Hyderabad

UT0911\_09 19 (0.434) Cm (19:22-54:60x0.010)

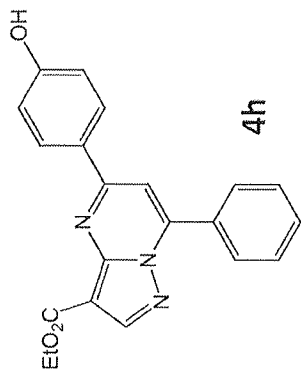

1: TOF MS ES+  
1.27e+00

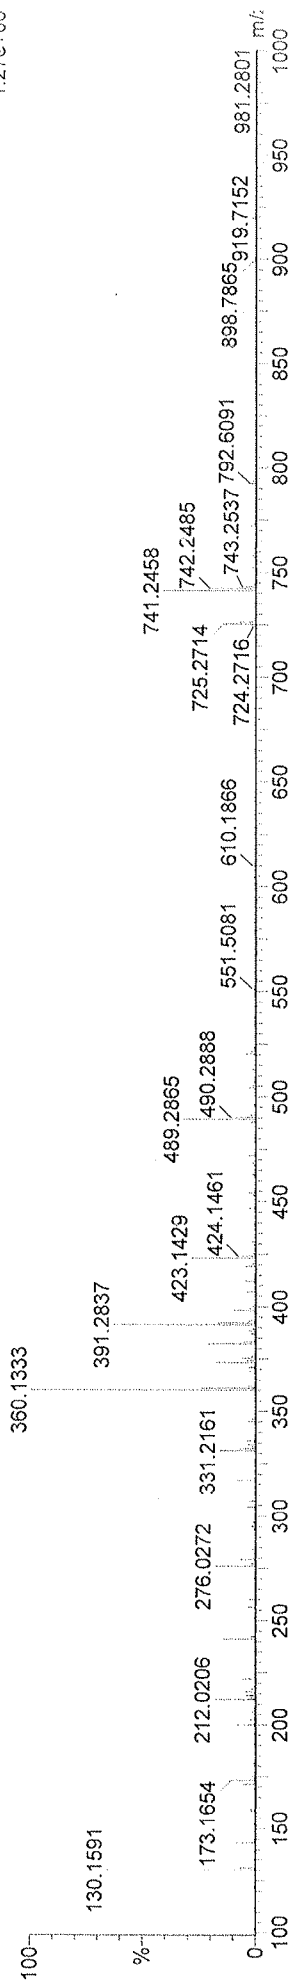

Minimum: 0.0  
Maximum: 80.0

| Mass     | Calc. Mass | mDa  | PPM  | DBE  | i-FIT | Formula       |
|----------|------------|------|------|------|-------|---------------|
| 360.1333 | 360.1348   | -1.5 | -4.2 | 14.5 | 1.8   | C21 H18 N3 O3 |



## Elemental Composition Report

### Single Mass Analysis

Tolerance = 5.0 PPM / DBE: min = 0.0, max = 80.0  
 Element prediction: Off  
 Number of isotope peaks used for i-FIT = 3

Monoisotopic Mass, Even Electron Ions  
 32 formula(e) evaluated with 1 results within limits (up to 4 best isotopic matches for each mass)  
 Elements Used:

C: 0-24 H: 0-25 N: 0-5 O: 0-3

CPPS-9

Aurigene Discovery Technologies, Hyderabad

UT0911\_08 17 (0.399) Cm (17:22-64:71x0.010)

1: TOF MS ES-  
 3.12e+0C

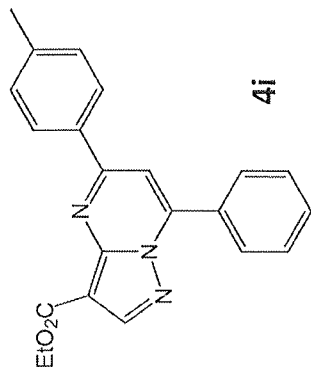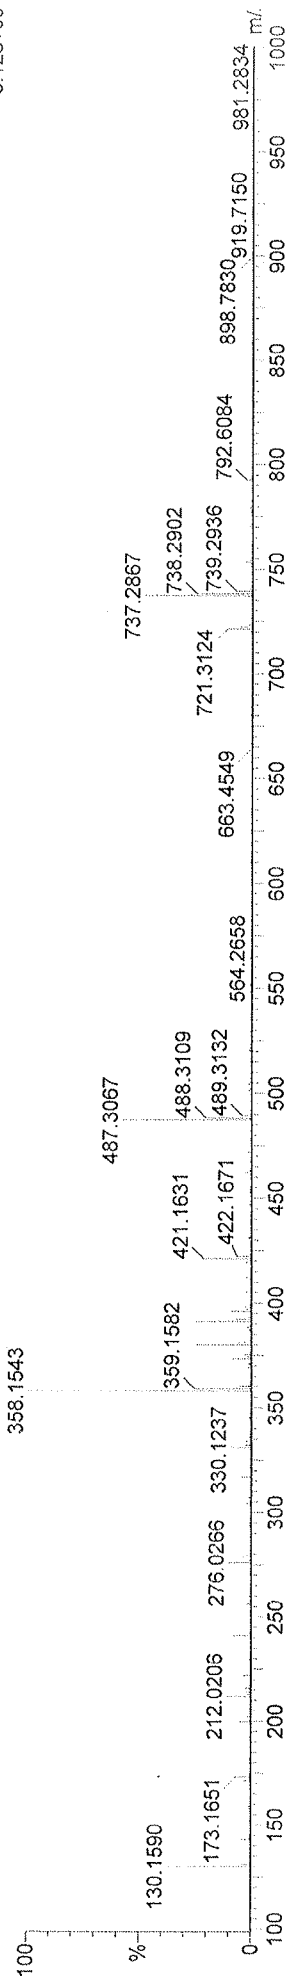

| Mass     | Calc. Mass | mDa  | PPM  | DBE  | Formula       |
|----------|------------|------|------|------|---------------|
| 358.1543 | 358.1556   | -1.3 | -3.6 | 14.5 | C22 H20 N3 O2 |
|          |            |      |      | 0.0  |               |
|          |            |      |      | 80.0 |               |

### Elemental Composition Report

#### Single Mass Analysis

Tolerance = 100.0 PPM / DBE: min = 0.0, max = 80.0

Element prediction: Off

Number of isotope peaks used for i-FIT = 3

Monoisotopic Mass, Even Electron Ions

185 formula(e) evaluated with 26 results within limits (up to 4 best isotopic matches for each mass)

Elements Used:

C: 0-35 H: 0-35 N: 0-5 O: 0-4 Cl: 0-1

CPSS-10

UT0911\_07 20 (0.450) Cm (20:24-45:55x0.010)

Aurigene Discovery Technologies, Hyderabad

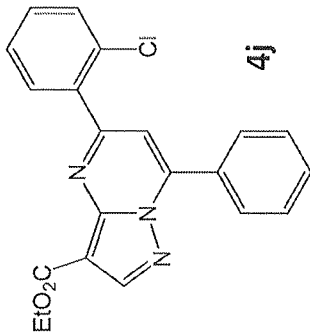

1: TOF MS ES:  
1.26e+06

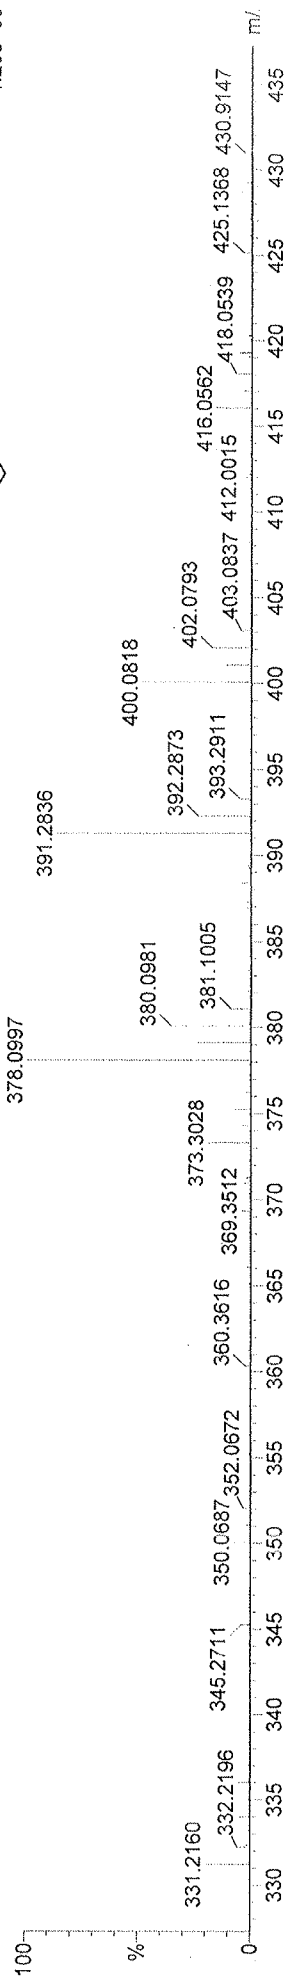

Minimum:  
Maximum:

5.0 100.0 0.0 80.0

Mass Calc. Mass mDa DBE Formula

378.0997 378.1009 -1.2 -3.2 14.5 2.1 C21 H17 N3 O2 Cl

### Elemental Composition Report

#### Single Mass Analysis

Tolerance = 5.0 PPM / DBE: min = 0.0, max = 80.0

Element prediction: Off

Number of isotope peaks used for i-FIT = 3

Monoisotopic Mass, Even Electron Ions

185 formula(e) evaluated with 3 results within limits (up to 4 best isotopic matches for each mass)

Elements Used:

C: 0-35 H: 0-35 N: 0-5 O: 0-4 Br: 0-1

CPPS11

Aurigene Discovery Technologies, Hyderabad

UT0911\_01 13 (0.308) Cm (13:19-57:68x0.010)

1: TOF MS ES-  
2.49e+0C

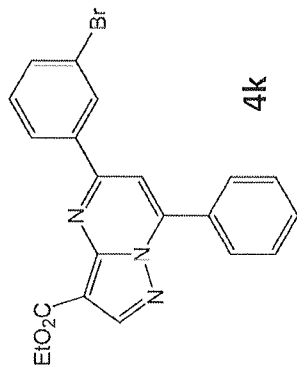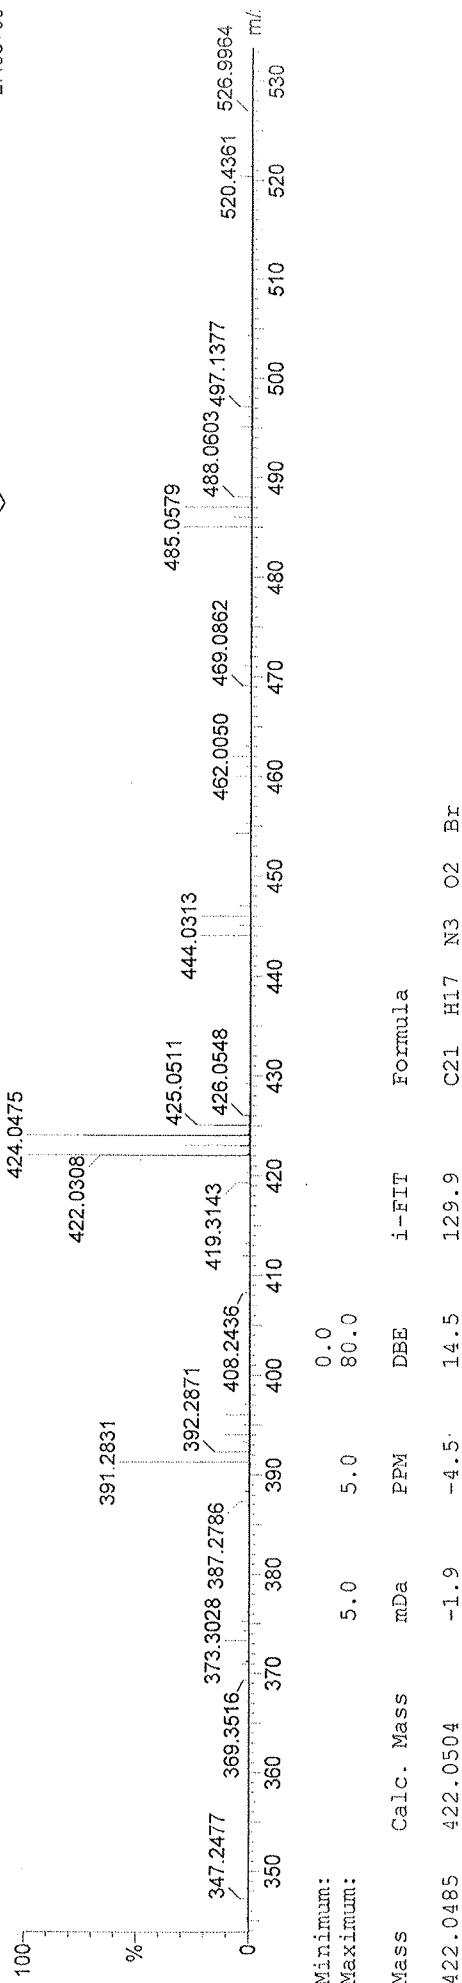

Minimum:

Maximum: 5.0 5.0 0.0

Mass Calc. Mass mDa PPM DBE Formula

422.0485 422.0504 -1.9 -4.5 14.5 129.9 C21 H17 N3 O2 Br

### Elemental Composition Report

#### Single Mass Analysis

Tolerance = 5.0 PPM / DBE: min = 0.0, max = 80.0

Element prediction: Off

Number of isotope peaks used for i-FIT = 3

Monoisotopic Mass, Even Electron Ions

53 formula(e) evaluated with 1 results within limits (up to 4 best isotopic matches for each mass)

Elements Used:

C: 0-25 H: 0-30 N: 0-3 O: 0-4 Br: 0-1

CPP21

Aurigenes Discovery Technologies, Hyderabad

UT0911\_04\_18 (0.415) Cm (18:23-56:60x0.010)

1: TOF MS ES-  
3.25e+0C

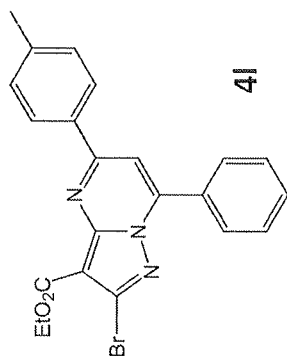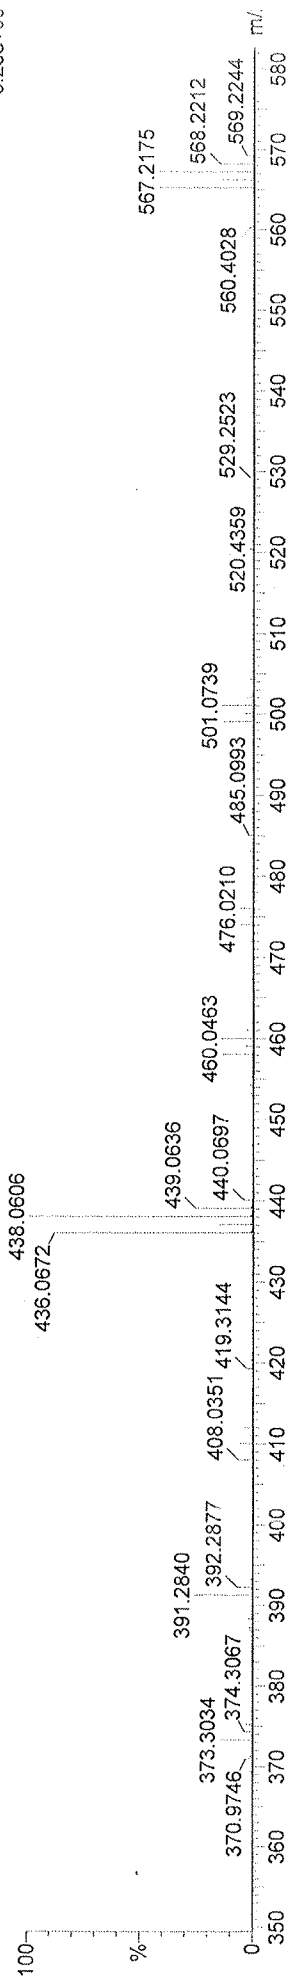

Minimum:  
Maximum:

5.0 5.0 0.0  
mDa DBE

Mass Calc. Mass PPM i-FIT Formula

436.0672 436.0661 1.1 2.5 897.9 C22 H19 N3 O2 Br

### Elemental Composition Report

#### Single Mass Analysis

Tolerance = 5.0 PPM / DBE: min = 0.0, max = 80.0  
 Element prediction: Off  
 Number of isotope peaks used for i-FIT = 3

Monoisotopic Mass, Even Electron Ions  
 52 formula(e) evaluated with 1 results within limits (up to 4 best isotopic matches for each mass)  
 Elements Used:

C: 0-24 H: 0-25 N: 0-5 O: 0-3  
 CPPS31

Aurigene Discovery Technologies, Hyderabad

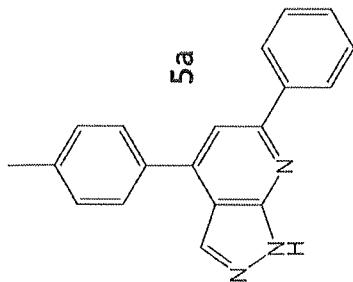

1: TOF MS ES<sup>+</sup>  
 1.27e+00

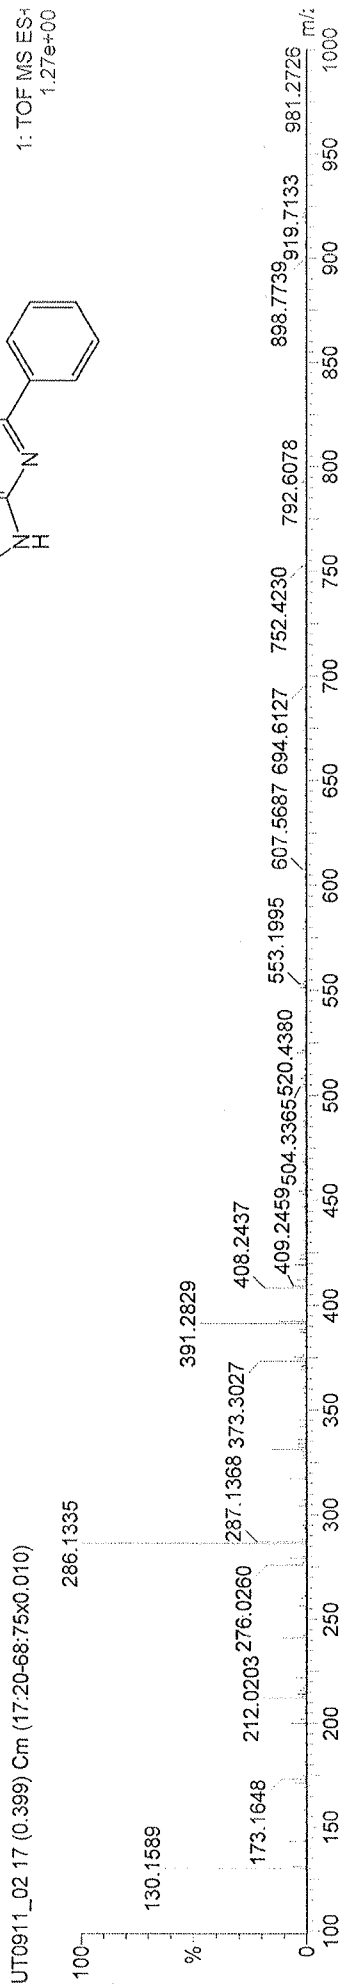

Minimum:  
 Maximum:

0.0  
 80.0

| Mass     | Calc. Mass | PPM  | DBE  | i-FIT | Formula    |
|----------|------------|------|------|-------|------------|
| 286.1335 | 286.1344   | -0.9 | 13.5 | 1.4   | C19 H16 N3 |

## Elemental Composition Report

### Single Mass Analysis

Tolerance = 5.0 PPM / DBE: min = 0.0, max = 80.0

Element prediction: Off

Number of isotope peaks used for i-FIT = 3

Monoisotopic Mass, Even Electron Ions

51 formula(e) evaluated with 1 results within limits (up to 4 best isotopic matches for each mass)

Elements Used:

C: 0-24 H: 0-25 N: 0-5 O: 0-3

CPSS32

Aurigene Discovery Technologies, Hyderabad

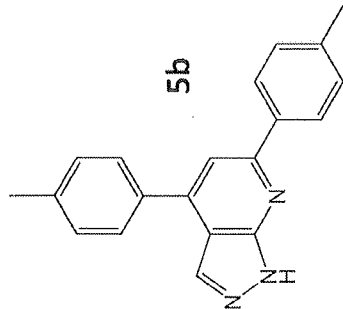

UT0911\_03 19 (0.433) Cm (19:20)

1: TOF MS ES+  
5.72e+00

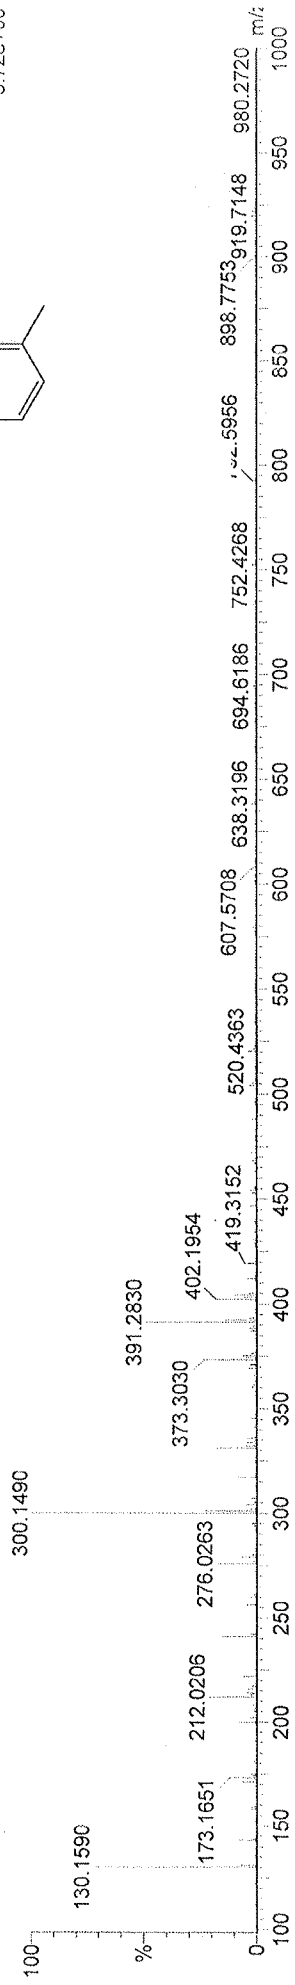

Minimum:  
Maximum:

0.0  
80.0

5.0 5.0

| Mass     | Calc. Mass | mDa  | PPM  | DBE  | i-FIT | Formula    |
|----------|------------|------|------|------|-------|------------|
| 300.1490 | 300.1501   | -1.1 | -3.7 | 13.5 | 1.0   | C20 H18 N3 |

### Elemental Composition Report

#### Single Mass Analysis

Tolerance = 5.0 PPM / DBE: min = 0.0, max = 80.0  
 Element prediction: Off  
 Number of isotope peaks used for i-FIT = 3

Monoisotopic Mass, Even Electron Ions  
 77 formula(e) evaluated with 1 results within limits (up to 4 best isotopic matches for each mass)  
 Elements Used:

C: 0-35 H: 0-35 N: 0-5 O: 0-4

CPPS-Suzuki

Aurigene Discovery Technologies, Hyderabad

UT0911\_05 20 (0.451) Cm (20:22-66:76x0.010)

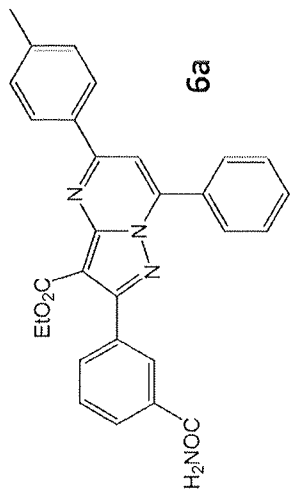

1: TOF MS ES+  
 8.55e+00:

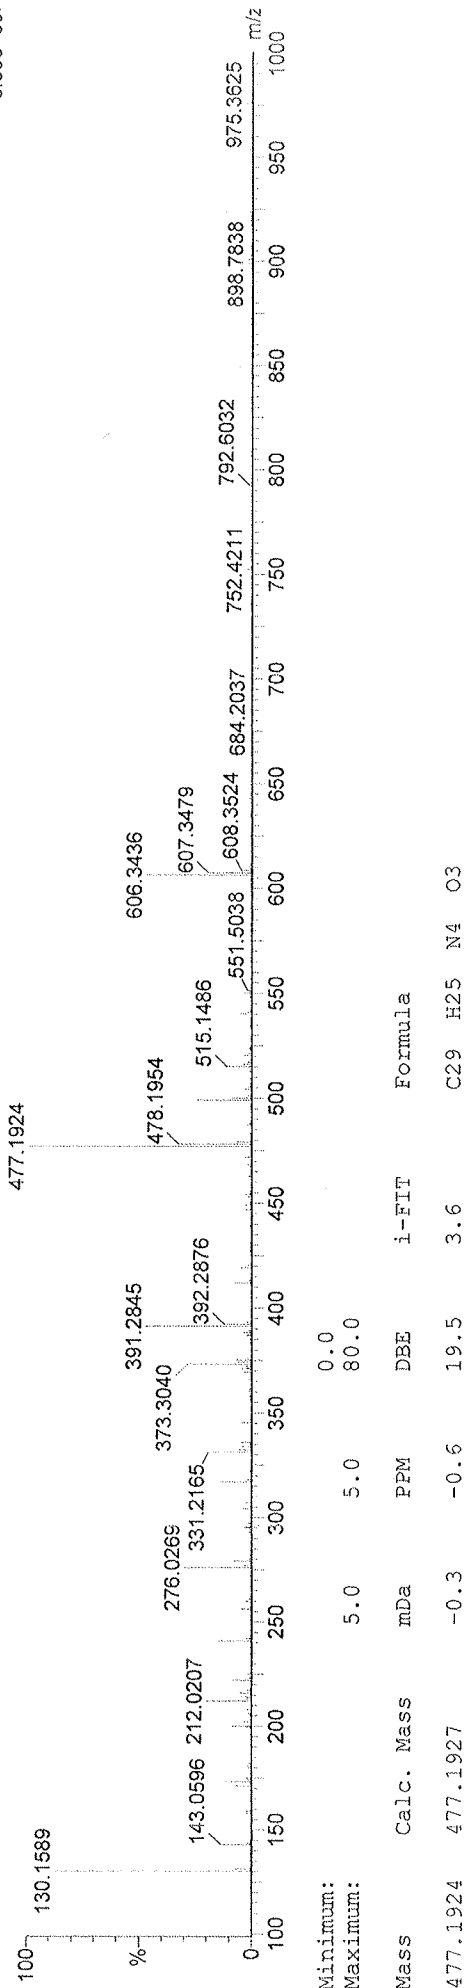

Minimum:  
 Maximum:

Mass 477.1924

Calc. Mass 477.1927

PPM -0.6

DBE 19.5

i-FIT 3.6

Formula C29 H25 N4 O3

### Elemental Composition Report

#### Single Mass Analysis

Tolerance = 5.0 PPM / DBE: min = 0.0, max = 80.0  
 Element prediction: Off  
 Number of isotope peaks used for i-FIT = 3

Monoisotopic Mass, Even Electron Ions

71 formula(e) evaluated with 1 results within limits (up to 4 best isotopic matches for each mass)

Elements Used:

C: 0-35 H: 0-35 N: 0-5 O: 0-4

CPPS-SOG

Aurigene Discovery Technologies, Hyderabad

UT0911\_06 21 (0.490) Cm (21:26-48:56x0.010)

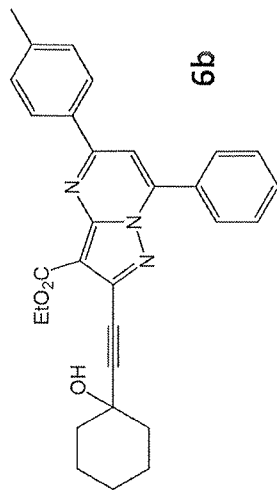

1: TOF MS ES+  
1.45e+00

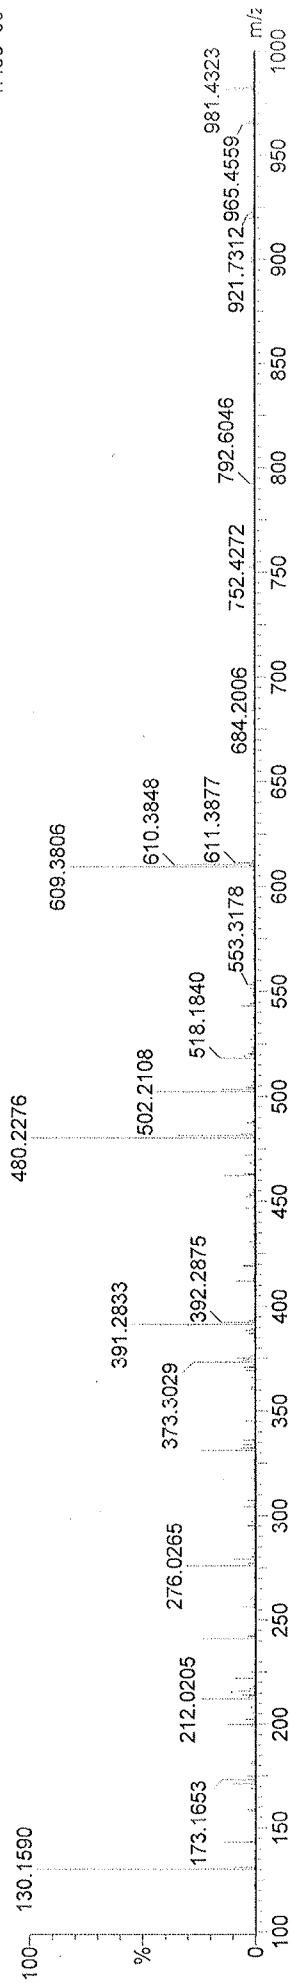

Minimum: 0.0

Maximum: 80.0

| Mass     | Calc. Mass | mDa  | PPM  | DBE  | i-FIT | Formula       |
|----------|------------|------|------|------|-------|---------------|
| 480.2276 | 480.2287   | -1.1 | -2.3 | 17.5 | 2.7   | C30 H30 N3 O3 |
